# Supplementary material for: Controlled introduction of functional groups at one P atom in [Cp*Fe(η5-P5)] and release of functionalised phosphines
Source: Royal Society of Chemistry journal article supplement (doi:10.1039/d3sc01488f), 2023-01-01
Supplement: d3sc01488f1.pdf [file d3sc01488f1.pdf]

## Supplementary Information for

# Controlled introduction of functional groups at one P atom in [Cp\*Fe( $\eta^5$ -P<sub>5</sub>)] and release of functionalised phosphines

Stephan Reichl<sup>1</sup>, Felix Riedelberger<sup>1</sup>, Martin Piesch<sup>1</sup>, Gábor Balázs<sup>1</sup>, Michael Seidl<sup>1</sup>,  
Manfred Scheer<sup>1\*</sup>

<sup>1</sup>Institute of Inorganic Chemistry, University of Regensburg; Universitätsstraße 31, 93053 Regensburg, Germany.

\*Corresponding author. Email: Manfred.Scheer@chemie.uni-regensburg.de

### This PDF file includes:

|                                       |    |
|---------------------------------------|----|
| 1. Experimental details               | 2  |
| 2. NMR spectroscopic characterization | 9  |
| 3. Crystallographic details           | 33 |
| 4. Additional information             | 54 |
| 5. Computational details              | 59 |
| 6. References                         | 61 |

## Experimental details

### General methods:

All manipulations were carried out under an inert atmosphere of dried argon using standard Schlenk and glove box techniques. 1,2-dimethoxyethane (DME) was dried and deoxygenated by distillation under argon atmosphere from sodium. All other solvents were dried using a MB SPS-800 device of the company MBRAUN and stored over molecular sieve. NMR spectra were recorded on a Bruker Avance III 400/600 MHz NMR spectrometer. Chemical shifts were measured at ambient temperature and are given in ppm; they are referenced to TMS for  $^1\text{H}$  and 85%  $\text{H}_3\text{PO}_4$  for  $^{31}\text{P}$  as external standard. Signal multiplicities are described using common abbreviations: s (singlet), d (doublet), t (triplet), q (quartet), quint (quintet), m (multiplet) and br (broad). LIFDI-/FD-/EI-MS spectra (LIFDI = liquid injection field desorption ionization, FD = field desorption, EI = electron ionization) were measured on a JEOL AccuTOF GCX. ESI-MS spectra (ESI = Electrospray ionization) were measured on an Agilent Q-TOF 6540 UHD. Elemental analysis (CHN) was determined using a Vario micro cube instrument. A glass stirring bar was used in reactions with potassium benzyl.

The compounds potassium benzyl (KBn,  $\text{KC}_7\text{H}_7$ ),  $[\text{K}(\text{DME})_2]_2[\text{Cp}^*\text{Fe}(\eta^4\text{-P}_5)]$  (**I'**),  $[\text{Cp}^*\text{Fe}(\eta^5\text{-P}_5)]$  (**I**),  $[\text{Li}(\text{DME})_3][\text{Cp}^*\text{Fe}(\eta^4\text{-P}_5\text{Me})]$  (**1a**) and  $[\text{Li}(\text{12c4})_2][\text{Cp}^*\text{Fe}(\eta^4\text{-P}_5\text{tBu})]$  (**1b**), were synthesized according to literature procedures<sup>1-4</sup>. Modified Synthesis of  $\text{KPPH}_2$ : Deprotonation of  $\text{PPh}_2\text{H}$  with KH in DME and stored as a stock solution at 8 °C.

Unless otherwise noted, all other materials were obtained from commercial suppliers and used without purification.

DFT calculations were carried out using the ORCA program<sup>5</sup>. The geometries were optimised using the B3LYP<sup>6-9</sup> functional together with the *def2-TZVP* basis set<sup>10</sup> and the RIJCOSX<sup>11</sup> approximation. The dispersion effects have been incorporated by using the charge dependent atom-pairwise dispersion correction D4<sup>12</sup> as implemented in Orca.

CV / SQV measurements were conducted via the following setup: glass carbon-, Pt- and Ag electrodes; 0.01 mmol analyte, 500 mg  $[\text{NBu}_4][\text{PF}_6]$  as conductive salt, 5 mL solvent (*o*-DFB), ferrocene for reference.

Crystals suitable for single crystal X-ray diffraction analysis were obtained as described below. The diffraction data were collected either on a Gemini Ultra diffractometer equipped with an Atlas<sup>S2</sup> CCD detector and with a fine-focus sealed  $\text{Cu-K}\alpha$  X-ray tube, on a XtaLAB Synergy R, DW system diffractometer equipped with a HyPix-Arc 150 detector and a rotating-anode  $\text{Cu-K}\alpha$  X-ray tube or a GV50 diffractometer equipped with a Titan<sup>S2</sup> CCD detector and a micro-focus  $\text{Cu-K}\alpha$  X-ray tube. Data collection and reduction were performed with CrysAlisPro software package. The structures were solved with Olex2<sup>13</sup>, using ShelXT<sup>14</sup> and a least-square refinement on  $F^2$  was carried out with ShelXL<sup>15</sup>. All non-hydrogen atoms were refined anisotropically. Hydrogen atoms at the carbon atoms were located in idealized positions and refined with isotropic displacement parameters according to the riding model. The images of the molecular structures were made using Olex2.<sup>13</sup> All NMR simulations were conducted with the *WinDaisy* application within the NMR software *Top Spin* 4.1.1 by Bruker.

## Synthetic protocols:

### Synthesis of $[\text{K}(\text{18c6})(\text{THF})][\text{Cp}^*\text{Fe}(\eta^4\text{-P}_5\text{-C}\equiv\text{CPh})]$ (**1c**):

Benzyl potassium (0.29 mmol, 37.8 mg, 1 eq) was dissolved in THF and 0.29 mmol (0.50 mL, 1 eq) of a 0.58 molar solution of ethynylbenzene in THF was added. Thereby the color changed from red to colorless. Afterwards this solution was added to a solution of 100 mg (0.29 mmol, 1 eq)  $[\text{Cp}^*\text{Fe}(\eta^5\text{-P}_5)]$  (**1**) at  $-80^\circ\text{C}$  in THF. The solution was slowly warmed up to ambient temperatures and stirred overnight. All volatiles were removed in vacuum and the brown residue was washed three times with 10 mL *n*-hexane. 38 mg (0.145 mmol, 1eq) 18-crown-6 was dissolved in THF 5 mL, added to the brown residue, layered with 20 mL *n*-hexane and stored at  $4^\circ\text{C}$ . After two weeks metallic dark green blocks of  $[\text{K}(\text{18c6})(\text{thf})][\text{Cp}^*\text{Fe}(\eta^4\text{-P}_5\text{-C}\equiv\text{C-Ph})]$  (**1c**) were formed.

Yield: 124.0 mg (0.151 mmol, 27 %).  $^1\text{H NMR}$  (THF- $d_8$ , 293 K):  $\delta$  [ppm] = 7.25 (m, 3 H, -Ph), 7.15 (m, 2 H, -Ph), 3.87 (s, 33 H, 18c6), 3.87 (33 H, THF), 2.01 (m, 3 H, THF), 1.73 (s, 15 H,  $\text{C}_5(\text{CH}_3)_5$ ).  $^{31}\text{P}\{^1\text{H}\}$  NMR (THF- $d_8$ , 293 K):  $\delta$  [ppm] = 35.5 (m, 1 P,  $\text{P}_A$ ), 26.1 (m, 2 P,  $\text{P}_{B,B'}$ ),  $-60.3$  (m, 2 P,  $\text{P}_{X,X'}$ ).  $^{31}\text{P}$  NMR (THF- $d_8$ , 293 K):  $\delta$  [ppm] = 35.5 (m, 1 P,  $\text{P}_A$ ), 26.1 (m, 2 P,  $\text{P}_{B,B'}$ ),  $-60.3$  (m, 2 P,  $\text{P}_{X,X'}$ ). (ESI-MS (DME): 446.96 (100 %,  $[\text{M}]^+$ ), 478.95 (16 %,  $[\text{M-O}_2]^+$ ). Elemental analysis (calcd., found for  $\text{C}_{34}\text{H}_{52}\text{FeKO}_7\text{P}_5$ ): C (49.64, 49.66), H (6.37, 6.39).

Alternative route: Compound **1** (0.87 mmol, 300.0 mg, 1eq) and  $\text{Li-C}\equiv\text{CPh}$  (0.87 mmol, 94.0 mg, 1 eq) were dissolved together in THF at r.t. Within the next 30 minutes, the green color of the solution got darker. After letting the solution stir overnight, the solvent was removed under reduced pressure and a 0.8102 molar solution of **12c4** in DME (1.74 mmol, 2.15 mL, 2 eq) was added. The solution was layered with 10 mL of *n*-Hexane and stored at r.t. Crystals suitable for XRD were obtained as green plates after one week. The analytical data matches the anion of **1c**.

Yield: 497.0 mg (0.69 mmol, 79 %).  $^1\text{H NMR}$  (THF- $d_8$ , 293 K):  $\delta$  [ppm] = 7.31 (m, 3 H, -Ph), 7.17 (m, 2 H, -Ph), 4.06 (s, 16 H, **12c4**), 3.67 (6 H, DME), 3.51 (m, 4 H, DME), 1.73 (s, 15 H,  $\text{C}_5(\text{CH}_3)_5$ ).  $^{31}\text{P}\{^1\text{H}\}$  NMR (THF- $d_8$ , 293 K):  $\delta$  [ppm] = 35.7 (m, 1 P,  $\text{P}_A$ ), 26.0 (m, 2 P,  $\text{P}_{B,B'}$ ),  $-59.3$  (m, 2 P,  $\text{P}_{X,X'}$ ).  $^{31}\text{P}$  NMR (THF- $d_8$ , 293 K):  $\delta$  [ppm] = 35.7 (m, 1 P,  $\text{P}_A$ ), 26.0 (m, 2 P,  $\text{P}_{B,B'}$ ),  $-59.3$  (m, 2 P,  $\text{P}_{X,X'}$ ). For coupling constants, see Table **S1**).

### Reaction of $[\text{Li}(\text{12c4})_2][\text{Cp}^*\text{Fe}(\eta^4\text{-P}_5\text{-}^t\text{Bu})]$ (**1a**) with 1,3-dibromopropane:

A solution of *in situ* generated **1a** ( $[\text{Cp}^*\text{Fe}(\eta^5\text{-P}_5)]$  (**1**): 2.9 mmol, 1 g, 1 eq;  $^t\text{BuLi}$  in *n*-pentane: 0.4 mmol,  $v = 0.97$  mL,  $c = 1.028$  mol·L $^{-1}$ , 1 eq) in 20 mL THF was added to a 0.917 molar solution of 1,3-dibromopropane in DME (2 mmol, 2.18 mL, 2 eq) at room temperature. A colour change from brown to green occurred and a colourless solid was formed. The mixture was stirred for 18 hours. The solvent was removed under reduced pressure. The residue was dissolved in dichloromethane, silica is added, and the solvent was removed *in vacuo*. The preabsorbed reaction mixture was purified via column chromatography ( $\text{SiO}_2$ , hexane, 15 x 3 cm). Using a mixture of hexane/toluene (8:2), a first green fraction ( $[\text{Cp}^*\text{Fe}(\eta^4\text{-P}_5\text{-}^t\text{Bu}(\text{CH}_2)_3\text{Br})]$  (**2a**), followed by a brown one ( $[(\text{Cp}^*\text{Fe})_2\{\mu,\eta^{4:4}\text{-P}_5\text{-}^t\text{Bu}(\text{CH}_2)_3\text{P}_5\text{-}^t\text{Bu}\}]$  (**3a**) can be eluted. The solvent of both fractions was removed under reduced pressure.  $[\text{Cp}^*\text{Fe}(\eta^4\text{-P}_5\text{-}^t\text{Bu}(\text{CH}_2)_3\text{Br})]$  (**2a**) can be isolated as dark green needles after one day in a concentrated *n*-hexane solution, stored at  $-30^\circ\text{C}$ .  $[(\text{Cp}^*\text{Fe})_2\{\mu,\eta^{4:4}\text{-P}_5\text{-}^t\text{Bu}(\text{CH}_2)_3\text{P}_5\text{-}^t\text{Bu}\}]$  (**3a**) can be obtained as brown needles after one week via layering a dichloromethane (3 mL) solution with acetonitrile (10 mL) and stored at  $-30^\circ\text{C}$ .

### Data for $[\text{Cp}^*\text{Fe}(\eta^4\text{-P}_5\text{-}^t\text{Bu}(\text{CH}_2)_3\text{Br})]$ (**2a**):

Yield: 917.0 mg (1.69 mmol, 58 %).  $^1\text{H NMR}$  ( $\text{CD}_2\text{Cl}_2$ , 293 K):  $\delta$  [ppm] = 3.62 (t, 2 H,  $J_{\text{H-H}} = 6.34$  Hz,  $(\text{CH}_2)_2\text{CH}_2\text{-Br}$ ), 2.70 (m, 2 H,  $-(\text{CH}_2)_2\text{CH}_3$ ), 2.56 (m, 2H,  $-(\text{CH}_2)_2\text{CH}_3$ ), 1.63 (s, 15 H,  $\text{C}_5(\text{CH}_3)_5$ ), 0.59 (d, 9 H,  $^3J_{\text{P-H}} = 14.54$  Hz,  $-\text{C}(\text{CH}_3)_3$ ).  $^{31}\text{P}\{^1\text{H}\}$  NMR ( $\text{CD}_2\text{Cl}_2$ , 293 K):  $\delta$  [ppm] = 165.1 (m, 1 P,  $\text{P}_A$ ), 40.2 (m, 2 P,  $\text{P}_{M,M'}$ ),  $-121.6$  (m, 2 P,  $\text{P}_{X,X'}$ ).  $^{31}\text{P}$  NMR ( $\text{CD}_2\text{Cl}_2$ , 293 K):  $\delta$  [ppm] = 165.1 (m, 1 P,  $\text{P}_A$ ), 40.2 (m, 2 P,

$P_{M,M}$ ), -121.6 (m, 2 P,  $P_{X,X}$ ). For coupling constants, see Table S2. **LIFDI-MS** (toluene):  $m/z = 523.90$  (100 %,  $[M]^+$ ). Elemental analysis (calcd., found for  $C_{17}H_{30}FeBrP_5$ ): C (47.26, 47.61), H (7.40, 7.49).

**Data for [(Cp\*Fe)<sub>2</sub>{ $\mu,\eta^{4:4}$ -P<sub>5</sub>Bu(CH<sub>2</sub>)<sub>3</sub>P<sub>5</sub>Bu}] (3a/3a')**

Yield: 390.0 mg (0.46 mmol, 32 %).

**3a**: <sup>1</sup>H NMR (CD<sub>2</sub>Cl<sub>2</sub>, 293 K):  $\delta$  [ppm] = 2.92 (m, 6 H, -(CH<sub>2</sub>)<sub>3</sub>-), 1.69 (s, 30 H, C<sub>5</sub>(CH<sub>3</sub>)<sub>5</sub>), 0.69 (d, 18 H, <sup>3</sup>J<sub>P-H</sub> = 14.32 Hz, -C(CH<sub>3</sub>)<sub>3</sub>), <sup>31</sup>P{<sup>1</sup>H} NMR (CD<sub>2</sub>Cl<sub>2</sub>, 293 K):  $\delta$  [ppm] = 162.4 (m, 1 P, P<sub>A</sub>), 44.6 (m, 2 P, P<sub>M,M</sub>), -120.1 (m, 2 P, P<sub>X,X</sub>). <sup>31</sup>P NMR (CD<sub>2</sub>Cl<sub>2</sub>, 293 K):  $\delta$  [ppm] = 162.4 (m, 1 P, P<sub>A</sub>), 44.6 (m, 2 P, P<sub>M,M</sub>), -120.1 (m, 2 P, P<sub>X,X</sub>). For coupling constants, see Table S7.

**3a'**: <sup>1</sup>H NMR (CD<sub>2</sub>Cl<sub>2</sub>, 293 K):  $\delta$  [ppm] = 2.75 (m, 1 H, -(CH<sub>2</sub>)<sub>3</sub>-), 2.61 (m, 2 H, -(CH<sub>2</sub>)<sub>3</sub>-), 1.77 (s, 8 H, C<sub>5</sub>(CH<sub>3</sub>)<sub>5</sub>), 1.69 (s, 8 H, C<sub>5</sub>(CH<sub>3</sub>)<sub>5</sub>), 0.66 (d, 5 H, <sup>3</sup>J<sub>P-H</sub> = 13.83 Hz, -C(CH<sub>3</sub>)<sub>3</sub>), 0.64 (d, 5 H, <sup>3</sup>J<sub>P-H</sub> = 14.33 Hz, -C(CH<sub>3</sub>)<sub>3</sub>). <sup>31</sup>P{<sup>1</sup>H} NMR (CD<sub>2</sub>Cl<sub>2</sub>, 293 K):  $\delta$  [ppm] = 162.4 (m, 1 P, P<sub>A</sub>), 44.6 (m, 2 P, P<sub>M,M</sub>), -120.1 (m, 2 P, P<sub>X,X</sub>). <sup>31</sup>P NMR (CD<sub>2</sub>Cl<sub>2</sub>, 293 K):  $\delta$  [ppm] = 162.4 (m, 1 P, P<sub>A</sub>), 44.6 (m, 2 P, P<sub>M,M</sub>), -120.1 (m, 2 P, P<sub>X,X</sub>). **LIFDI-MS** (toluene):  $m/z = 847.93$  (100 %,  $[M]^+$ ). Elemental analysis (calcd., found for C<sub>31</sub>H<sub>54</sub>Fe<sub>2</sub>P<sub>10</sub>): C (43.87, 43.61), H (6.42, 6.36). The given Proton NMR Spectrum (Fig. S7) and corresponding signals belong to an attempt to maximize **2b'** (see **Additional Information**) and does not correspond to the ratio in of **3a** / **3a'** in solid state (see **Crystallographic details**).

**Reaction of [Li(dme)<sub>3</sub>][Cp\*Fe( $\eta^4$ -P<sub>5</sub>Me)] (1b) with 1,3-dibromopropane:**

A solution of *in situ* generated **1b** ([Cp\*Fe( $\eta^5$ -P<sub>5</sub>)] (I): 0.4 mmol, 138.4 mg, 1 eq; MeLi in Et<sub>2</sub>O: 0.4 mmol,  $v = 0.50$  mL,  $c = 0.802$  mol·L<sup>-1</sup>, 1 eq) in 15 mL THF was added to a 0.917 molar solution of 1,3-dibromopropane in DME (0.8 mmol, 0.9 mL, 2 eq). A colour change from brown to green occurred and a colourless solid was formed. The mixture was stirred for one hour. The solvent was removed under reduced pressure. The residue was dissolved in dichloromethane, silica is added and the solvent was removed *in vacuo*. The preabsorbed reaction mixture was purified via column chromatography (SiO<sub>2</sub>, hexane, 15 x 2 cm). Using a mixture of hexane/dichloromethane (10:1), a first green fraction ([Cp\*Fe( $\eta^4$ -P<sub>5</sub>Me(CH<sub>2</sub>)<sub>3</sub>Br)] (**2b**), followed by a brown one ([Cp\*Fe)<sub>2</sub>{ $\mu,\eta^{4:4}$ -P<sub>5</sub>Me(CH<sub>2</sub>)<sub>3</sub>P<sub>5</sub>Me}] (**3b**) can be eluted. The solvent of both fractions was removed under reduced pressure. [Cp\*Fe( $\eta^4$ -P<sub>5</sub>Me(CH<sub>2</sub>)<sub>3</sub>Br)] (**2b**) can be isolated as dark green needles after one day in a concentrated *n*-hexane solution, stored at -30 °C. [(Cp\*Fe)<sub>2</sub>{ $\mu,\eta^{4:4}$ -P<sub>5</sub>Me(CH<sub>2</sub>)<sub>3</sub>P<sub>5</sub>Me}] (**3b**) can be obtained after one week as brown needles via layering a dichloromethane solution (3 mL) with acetonitrile (10 mL) and stored at -30°C.

**Data for [Cp\*Fe( $\eta^4$ -P<sub>5</sub>Me(CH<sub>2</sub>)<sub>3</sub>Br)] (2b):**

Yield: 77.7 mg (0.161 mmol, 40 %). <sup>1</sup>H NMR (C<sub>6</sub>D<sub>6</sub>, 293 K):  $\delta$  [ppm] = 2.88 (t, 2 H,  $J_{H-H} = 6.28$  Hz, -(CH<sub>2</sub>)<sub>2</sub>CH<sub>2</sub>Br), 2.05 (m, 2 H, -(CH<sub>2</sub>)<sub>2</sub>CH<sub>2</sub>Br), 1.75 (m, 2 H, -(CH<sub>2</sub>)<sub>2</sub>CH<sub>2</sub>Br), 1.63 (s, 15 H, C<sub>5</sub>(CH<sub>3</sub>)<sub>5</sub>), 0.04 (d, 3 H, -CH<sub>3</sub>, <sup>2</sup>J<sub>P-H</sub> = 10.57 Hz). <sup>31</sup>P{<sup>1</sup>H} NMR (C<sub>6</sub>D<sub>6</sub>, 293 K):  $\delta$  [ppm] = 128.9 (m, 1 P, P<sub>A</sub>), 32.0 (m, 2 P, P<sub>M,M</sub>), -130.3 (m, 2 P, P<sub>X,X</sub>). <sup>31</sup>P NMR (C<sub>6</sub>D<sub>6</sub>, 293 K):  $\delta$  [ppm] = 128.9 (m, 1 P, P<sub>A</sub>), 32.0 (m, 2 P, P<sub>M,M</sub>), -130.3 (m, 2 P, P<sub>X,X</sub>). For coupling constants, see Table S3. **FD-MS** (toluene):  $m/z = 481.91$  (100 %,  $[M]^+$ ). Elemental analysis (calcd., found for C<sub>15</sub>H<sub>24</sub>FeBrP<sub>5</sub>): C (34.82, 34.77), H (5.01, 4.90).

**Data for [(Cp\*Fe)<sub>2</sub>{ $\mu,\eta^{4:4}$ -P<sub>5</sub>Me(CH<sub>2</sub>)<sub>3</sub>P<sub>5</sub>Me}] (3b):**

Yield: 100.9 mg (0.132 mmol, 33 %).

<sup>1</sup>H NMR (C<sub>6</sub>D<sub>6</sub>, 293 K):  $\delta$  [ppm] = 2.27 (m, 2 H, -(CH<sub>2</sub>)<sub>3</sub>-), 1.86 (m, 1 H, -(CH<sub>2</sub>)<sub>3</sub>-), 1.67 (s, 15 H, C<sub>5</sub>(CH<sub>3</sub>)<sub>5</sub>), 0.19 (d, 3 H, <sup>2</sup>J<sub>P-H</sub> = 10.48 Hz, -CH<sub>3</sub>). <sup>31</sup>P{<sup>1</sup>H} NMR (C<sub>6</sub>D<sub>6</sub>, 293 K):  $\delta$  [ppm] = 127.4 (m, 1 P, P<sub>A</sub>), 32.6 (m, 2 P, P<sub>M,M</sub>), -129.5 (m, 2 P, P<sub>X,X</sub>). <sup>31</sup>P NMR (C<sub>6</sub>D<sub>6</sub>, 293 K):  $\delta$  [ppm] = 127.4 (m, 1 P, P<sub>A</sub>), 32.6 (m, 2 P, P<sub>M,M</sub>), -129.5 (m, 2 P, P<sub>X,X</sub>). For coupling constants, see Table S8.

**LIFDI-MS** (toluene):  $m/z = 763.94$  (100 %,  $[M]^+$ ). analysis (calcd., found for C<sub>25</sub>H<sub>42</sub>Fe<sub>2</sub>P<sub>10</sub>): C (39.30, 39.05), H (5.54, 5.55).

**Synthesis of [Cp\*Fe( $\eta^4$ -P<sub>5</sub>(-C≡CPh)Me)] (2c):**

An *in situ* generated solution of **1c** ([Cp\*Fe( $\eta^5$ -P<sub>5</sub>)] (I): 0.6 mmol, 207.6 mg, 1 eq; Li-C≡CPh: 0.6 mmol,  $m = 64.8$  mg, 1 eq) in 15 mL THF was cooled to -80°C and a 1.116 molar solution of MeI in Et<sub>2</sub>O

(0.6 mmol, 0.54 mL, 1 eq) was added. The mixture was allowed to stir overnight and reach room temperature, thereby the solution turned brownish/red. The solvent was removed under reduced pressure. The residue was dissolved in dichloromethane, silica is added, and the solvent was removed *in vacuo*. The preabsorbed reaction mixture was purified via column chromatography (SiO<sub>2</sub>, hexane, 7 x 1 cm). Using a mixture of hexane/dichloromethane (8:1), a first green fraction, can be eluted. A second red one showed decomposition within the workup and could not be further characterized. The solvent of the first fraction was removed under reduced pressure. of [Cp\*Fe{η<sup>4</sup>-P<sub>5</sub>(-C≡CPh)Me}] (**2b**) can be isolated as dark green plates after one week in a concentrated CH<sub>2</sub>Cl<sub>2</sub> solution, layered with *n*-hexane and stored at -30 °C.

Yield: 180.0 mg (0.389 mmol, 65 %). <sup>1</sup>H NMR (C<sub>6</sub>D<sub>6</sub>, 293 K): δ [ppm] = 6.89 (m, 2 H, -Ph), 6.79 (m, 1 H, -Ph), 6.68 (m, 1 H, -Ph), 2.17 (m, 3 H, -CH<sub>3</sub>), 1.56 (s, 15 H, C<sub>5</sub>(CH<sub>3</sub>)<sub>5</sub>). <sup>31</sup>P{<sup>1</sup>H} NMR (C<sub>6</sub>D<sub>6</sub>, 293 K): δ [ppm] = 76.2 (m, 1 P, P<sub>A</sub>), 39.6 (m, 2 P, P<sub>M,M</sub>), -83.2 (m, 2 P, P<sub>X,X</sub>). <sup>31</sup>P NMR (C<sub>6</sub>D<sub>6</sub>, 293 K): δ [ppm] = 76.2 (m, 1 P, P<sub>A</sub>), 39.6 (m, 2 P, P<sub>G,G</sub>), -83.2 (m, 2 P, P<sub>X,X</sub>). For coupling constants, see **Table S4. FD-MS** (toluene): *m/z* = 461.04 (100 %, [M]<sup>+</sup>). Elemental analysis (calcd., found for C<sub>19</sub>H<sub>23</sub>FeP<sub>5</sub>): C (49.38, 49.16), H (5.02, 5.02).

#### Synthesis of [Cp\*Fe{η<sup>4</sup>-P<sub>5</sub>Me(CH<sub>2</sub>)<sub>3</sub>CN}] (**2d**):

A solution of **1a** (0.16 mmol, 100 mg, 1 eq) in 10 mL DME was cooled to -50 °C and a 0.1093 molar solution of 4-Bromobutyronitrile in DME (0.2 mmol, 1.43 mL, 1 eq) was added. The mixture was allowed to stir overnight and reach room temperature, thereby a colourless solid is formed. The solvent was removed under reduced pressure and a brown solution was extracted with 10 mL toluene and filtered over diatomaceous earth. The solvent was reduced, layered with *n*-pentane and stored at -30 °C.

Compound **2d** was isolated as dark blocks after one week.

Yield: 233 mg (0.12 mmol, 72 %). <sup>1</sup>H NMR (CD<sub>2</sub>Cl<sub>2</sub>, 293 K): δ [ppm] = 1.93 (m, 2 H, -(CH<sub>2</sub>)<sub>2</sub>CH<sub>2</sub>CN), 1.62 (s, 15 H, C<sub>5</sub>(CH<sub>3</sub>)<sub>5</sub>), 1.43 (t, 2 H, J<sub>H-H</sub> = 6.66 Hz, -(CH<sub>2</sub>)<sub>2</sub>CH<sub>2</sub>CN), 1.28 (m, 2 H, -(CH<sub>2</sub>)<sub>2</sub>CH<sub>2</sub>CN), -0.01 (d, 3 H, <sup>2</sup>J<sub>P-H</sub> = 10.41 Hz, -CH<sub>3</sub>). <sup>31</sup>P{<sup>1</sup>H} NMR (CD<sub>2</sub>Cl<sub>2</sub>, 293 K): δ [ppm] = 127.3 (m, 1 P, P<sub>A</sub>), 32.0 (m, 2 P, P<sub>M,M</sub>), -129.6 (m, 2 P, P<sub>1,X,X</sub>). <sup>31</sup>P NMR (CD<sub>2</sub>Cl<sub>2</sub>, 293 K): δ [ppm] = 127.3 (m, 1 P, P<sub>A</sub>), 32.0 (m, 2 P, P<sub>M,M</sub>), -129.6 (m, 2 P, P<sub>1,X,X</sub>). For coupling constants, see **Table S5. LIFDI-MS** (toluene): *m/z* = 428.99 (100 %, [M]<sup>+</sup>). Elemental analysis (calcd., found for C<sub>15</sub>H<sub>24</sub>FeP<sub>5</sub>N): C (41.99, 42.25), H (5.64, 5.61), N (3.26, 3.09).

#### Reaction of [Li(dme)<sub>3</sub>][Cp\*Fe(η<sup>4</sup>-P<sub>5</sub>Me)] (**1b**) with 1,4-dibromobutane:

A solution of *in situ* generated **1b** ([Cp\*Fe(η<sup>5</sup>-P<sub>5</sub>)] (**I**): 0.58 mmol, 200.6 mg, 1 eq; MeLi in Et<sub>2</sub>O: 0.58 mmol, *v* = 0.72 mL, *c* = 0.802 mol·L<sup>-1</sup>, 1 eq) in 15 mL THF was added to a 0.0968 molar solution of 1,4-dibromopropane in DME (1.16 mmol, 12.0 mL, 2 eq) at room temperature. The mixture was stirred for one hour. The solvent was removed under reduced pressure. The residue was dissolved in dichloromethane, silica is added and the solvent was removed *in vacuo*. The preabsorbed reaction mixture was purified via column chromatography (SiO<sub>2</sub>, hexane, 10 x 2 cm). Using a mixture of hexane/dichloromethane (8:1), a first green fraction ([Cp\*Fe(η<sup>4</sup>-P<sub>5</sub>Me(CH<sub>2</sub>)<sub>4</sub>Br)] (**2e**) can be eluted. Compound **2e** can be obtained as dark brown needles from a concentrated *cyclo*-hexane solution, stored at 8 °C.

Increasing the amount of dichloromethane up to a ratio of 1:1 (hexane), yields [(Cp\*Fe)<sub>2</sub>{μ,η<sup>4,4</sup>-P<sub>5</sub>Me(CH<sub>2</sub>)<sub>4</sub>P<sub>5</sub>Me}] (**3c**) as a green-brown fraction. Compound **3c** can be obtained after one week as green plates via layering a dichloromethane solution (3 mL) with hexane (10 mL) and stored at -30°C.

#### Data for [Cp\*Fe(η<sup>4</sup>-P<sub>5</sub>Me(CH<sub>2</sub>)<sub>4</sub>Br)] (**2e**):

Yield: 124.2 mg (0.250 mmol, 43 %). <sup>1</sup>H NMR (C<sub>6</sub>D<sub>6</sub>, 293 K): δ [ppm] = 2.88 (t, 2 H, J<sub>H-H</sub> = 6.06 Hz, -(CH<sub>2</sub>)<sub>2</sub>CH<sub>2</sub>-Br), 1.87 (m, 2 H, -(CH<sub>2</sub>)<sub>2</sub>CH<sub>2</sub>-Br), 1.63 (s, 15 H, C<sub>5</sub>(CH<sub>3</sub>)<sub>5</sub>), 1.47 (m, 4 H, -(CH<sub>2</sub>)<sub>2</sub>CH<sub>2</sub>-Br), 0.11 (d, 3 H, <sup>2</sup>J<sub>P-H</sub> = 10.61 Hz, -CH<sub>3</sub>). <sup>31</sup>P{<sup>1</sup>H} NMR (C<sub>6</sub>D<sub>6</sub>, 293 K): δ [ppm] = 130.8 (m, 1 P, P<sub>A</sub>), 32.0 (m, 2 P, P<sub>M,M</sub>), -130.8 (m, 2 P, P<sub>X,X</sub>). <sup>31</sup>P NMR (C<sub>6</sub>D<sub>6</sub>, 293 K): δ [ppm] = 130.8 (m, 1 P, P<sub>A</sub>), 32.0 (m, 2 P, P<sub>M,M</sub>),

-130.8 (m, 2 P, P<sub>X,X</sub>). For coupling constants, see **Table S6**. **LIFDI-MS** (toluene): *m/z* = 496.00 (100 %, [M]<sup>+</sup>). Elemental analysis (calcd., found for C<sub>15</sub>H<sub>26</sub>FeBrP<sub>5</sub>): C (36.25, 37.70), H (5.27, 5.08). elemental analysis failed after several attempts of the isolated crystals.

**Data for [(Cp\*Fe)<sub>2</sub>{μ,η<sup>4:4</sup>-P<sub>5</sub>Me(CH<sub>2</sub>)<sub>4</sub>P<sub>5</sub>Me}] (3c):**

Yield: 106.7 mg (0.137 mmol, 24 %). **<sup>1</sup>H NMR** (C<sub>6</sub>D<sub>6</sub>, 293 K): δ [ppm] = 2.10 (m, 4 H, -(CH<sub>2</sub>)<sub>4</sub>-), 1.68 (s, 30 H, C<sub>5</sub>(CH<sub>3</sub>)<sub>5</sub>), 2.92 (m, 4 H, -(CH<sub>2</sub>)<sub>4</sub>-), 0.23 (d, 6 H, <sup>2</sup>J<sub>P-H</sub> = 10.55 Hz, -CH<sub>3</sub>). **<sup>31</sup>P{<sup>1</sup>H} NMR** (C<sub>6</sub>D<sub>6</sub>, 293 K): δ [ppm] = 130.1 (m, 1 P, P<sub>A</sub>), 32.9 (m, 2 P, P<sub>M,M</sub>), -130.1 (m, 2 P, P<sub>X,X</sub>). **<sup>31</sup>P NMR** (C<sub>6</sub>D<sub>6</sub>, 293 K): δ [ppm] = 130.1 (m, 1 P, P<sub>A</sub>), 32.9 (m, 2 P, P<sub>M,M</sub>), -130.1 (m, 2 P, P<sub>X,X</sub>). For coupling constants, see **Table S9**. **LIFDI-MS** (toluene): *m/z* = 777.92 (100 %, [M]<sup>+</sup>). analysis (calcd., found for C<sub>26</sub>H<sub>44</sub>Fe<sub>2</sub>P<sub>10</sub>): C (40.14, 39.82), H (5.70, 5.57).

**Synthesis of [(Cp\*Fe)<sub>2</sub>{μ,η<sup>4:4</sup>-P<sub>5</sub><sup>t</sup>Bu(CH<sub>2</sub>)<sub>3</sub>P<sub>5</sub>Me}] (4):**

Compound **1b** (0.1 mmol, 63.8 mg, 1 eq) and **2a** (0.1 mmol, 52.5 mg, 1 eq) were dissolved separately in 10 mL THF. The solution of **1b** was added to **2a**. A colourless solid was formed and the suspension was allowed to stir for 1 hour. The solvent was removed under reduced pressure and a brown solution was extracted with 5 mL toluene and filtered over diatomaceous earth. The solvent was removed *in vacuo*. The brown residue was dissolved in 2 mL THF, layered with 4 mL *n*-pentane and stored at -30 °C. [(Cp\*Fe)<sub>2</sub>{μ,η<sup>4:4</sup>-P<sub>5</sub><sup>t</sup>Bu(CH<sub>2</sub>)<sub>3</sub>P<sub>5</sub>Me}] (**4**) was formed as dark green blocks after one day.

Yield: 64.5 mg (0.08 mmol, 80 %). **<sup>1</sup>H NMR** (CD<sub>2</sub>Cl<sub>2</sub>, 293 K): δ [ppm] = 2.79 (m, 4 H, -(CH<sub>2</sub>)<sub>2</sub>CH<sub>3</sub>), 2.44 (m, 2 H, -(CH<sub>2</sub>)<sub>2</sub>CH<sub>3</sub>), 1.67 (s, 15 H, C<sub>5</sub>(CH<sub>3</sub>)<sub>5</sub>), 1.66 (s, 15 H, C<sub>5</sub>(CH<sub>3</sub>)<sub>5</sub>), 0.79 (d, 3 H, <sup>2</sup>J<sub>P-H</sub> = 10.67 Hz, -CH<sub>3</sub>), 0.64 (d, 9 H, <sup>3</sup>J<sub>P-H</sub> = 14.54 Hz, -C(CH<sub>3</sub>)<sub>3</sub>), **<sup>31</sup>P{<sup>1</sup>H} NMR** (CD<sub>2</sub>Cl<sub>2</sub>, 293 K): δ [ppm] = 164.3 (m, 1 P, P<sub>1A</sub>), 128.9 (m, 1 P, P<sub>2A</sub>), 41.0 (m, 2 P, P<sub>1M,M</sub>), 29.8 (m, 2 P, P<sub>2M,M</sub>), -120.3 (m, 2 P, P<sub>1X,X</sub>), -129.9 (m, 2 P, P<sub>2X,X</sub>). **<sup>31</sup>P{<sup>1</sup>H} NMR** (CD<sub>2</sub>Cl<sub>2</sub>, 293 K): δ [ppm] = 164.3 (m, 1 P, P<sub>1A</sub>), 128.9 (m, 1 P, P<sub>2A</sub>), 41.0 (m, 2 P, P<sub>1M,M</sub>), 29.8 (m, 2 P, P<sub>2M,M</sub>), -120.3 (m, 2 P, P<sub>1X,X</sub>), -129.9 (m, 2 P, P<sub>2X,X</sub>). For coupling constants, see **Table S10, S11**. **LIFDI-MS** (toluene): *m/z* = 806.02 (100 %, [M]<sup>+</sup>). Elemental analysis (calcd., found for C<sub>28</sub>H<sub>48</sub>Fe<sub>2</sub>P<sub>10</sub>): C (41.72, 41.49), H (6.42, 5.79).

**Synthesis of [(Cp\*Fe){η<sup>4</sup>-P<sub>5</sub><sup>t</sup>Bu(CH<sub>2</sub>)<sub>3</sub>PPh<sub>2</sub>}] (5):**

Complex **2a** (0.5 mmol, 262.5 mg, 1 eq) was dissolved in 10 mL THF and cooled to -80 °C and a 0.233 molar solution of KPPH<sub>2</sub> in DME (2.2 mL, 1 eq) was added dropwise. The mixture was allowed to stir overnight and reach room temperature, thereby a colour solid was formed. The solvent was removed *in vacuum*, the brown residue was solved in hexane and purified via column chromatography (SiO<sub>2</sub>, hexane, 5 x 2 cm). Using a mixture of hexane/toluene (1:1) yields [(Cp\*Fe){η<sup>4</sup>-P<sub>5</sub><sup>t</sup>Bu(CH<sub>2</sub>)<sub>3</sub>PPh<sub>2</sub>}] (**8**) as a brown greenish fraction. The solvent was removed under reduced pressure and the brown residue is dissolved in 15 mL *n*-pentane. Compound **8** can be obtained spectroscopically pure as dark green crystals by slow removal of the solvent under reduced pressure at room temperature.

Yield: 237.1 mg (0.375 mmol, 75 %).

**<sup>1</sup>H NMR** (C<sub>6</sub>D<sub>6</sub>, 293 K): δ [ppm] = 7.48 (m, 8H, -(CH<sub>2</sub>)<sub>3</sub>PPh<sub>2</sub>), 7.11 (m, 8 H, -(CH<sub>2</sub>)<sub>3</sub>PPh<sub>2</sub>), 2.50 (m, 2 H, -(CH<sub>2</sub>)<sub>3</sub>PPh<sub>2</sub>), 2.18 (m, 2 H, -(CH<sub>2</sub>)<sub>3</sub>PPh<sub>2</sub>), 2.10 (m, 2 H, -(CH<sub>2</sub>)<sub>3</sub>PPh<sub>2</sub>), 1.59 (s, 15 H, C<sub>5</sub>(CH<sub>3</sub>)<sub>5</sub>), 0.29 (d, 9 H, <sup>2</sup>J<sub>P-H</sub> = 14.12 Hz, -C(CH<sub>3</sub>)<sub>3</sub>). **<sup>31</sup>P{<sup>1</sup>H} NMR** (C<sub>6</sub>D<sub>6</sub>, 293 K): δ [ppm] = 164.9 (m, 1 P, P<sub>A</sub>), 42.6 (m, 2 P, P<sub>M,M</sub>), -17.9 (s, 1P, PPh<sub>2</sub>), -121.7 (m, 2 P, P<sub>X,X</sub>). **<sup>31</sup>P NMR** (C<sub>6</sub>D<sub>6</sub>, 293 K): δ [ppm] = 164.9 (m, 1 P, P<sub>A</sub>), 42.6 (m, 2 P, P<sub>M,M</sub>), -17.9 (s, 1P, PPh<sub>2</sub>), -121.7 (m, 2 P, P<sub>X,X</sub>). For coupling constants, see **Table S12**. **LIFDI-MS** (toluene): *m/z* = 630.05 (100 %, [M]<sup>+</sup>). Elemental analysis (calcd., found for C<sub>29</sub>H<sub>40</sub>FeP<sub>6</sub>): C (55.23, 55.71), H (6.40, 6.18).

**Synthesis of P<sup>t</sup>BuBn((CH<sub>2</sub>)<sub>4</sub>Ph) (6):**

Complex **2a** (0.18 mmol, 94.5 mg, 1 eq) and KBn (0.36 mmol, 46.8 mg, 2 eq) were dissolved separately in 10 mL THF and cooled to -80 °C. One equivalent of the KBn solution was added dropwise (a <sup>31</sup>P{<sup>1</sup>H} NMR was recorded of the reaction mixture) (see Fig. S60). The mixture was allowed to stir for one hour, thereby

a colourless solid was formed (\*). The solution was again cooled to  $-80\text{ }^{\circ}\text{C}$ . and the second equivalent of the K<sub>Bn</sub> solution was added. The reaction mixture was stirred for an additional hour. The solvent was removed under reduced pressure. The brownish oily residue was extracted with 3 x 10 mL of *n*-pentane and filtered over diatomaceous earth. The solvent was removed *in vacuo*. Compound **6** can be isolated as a slightly brownish oil.

Yield: 37.5 mg (0.12 mmol, 67 %).

**<sup>1</sup>H NMR** (C<sub>6</sub>D<sub>6</sub>, 293 K):  $\delta$  [ppm] = 7.21 (m, 3 H, -Ph), 7.08 (m, 7 H, -Ph), 2.77 (dd, 1 H,  $^2J_{\text{P-H}} = 14.12$  Hz,  $^3J_{\text{P-H}} = 1.74$  Hz, P-CH<sub>2</sub>-Ph), 2.45 (dd, 1 H,  $^2J_{\text{P-H}} = 13.43$  Hz,  $^3J_{\text{P-H}} = 3.18$  Hz, P-CH<sub>2</sub>-Ph), 2.37 (t, 2 H,  $^2J_{\text{H-H}} = 7.69$  Hz,  $^3J_{\text{P-H}} = 1.74$  Hz, -CH<sub>2</sub>-Ph), 1.51 (m, 2 H, -(CH<sub>2</sub>)<sub>3</sub>-Ph), 1.30 (m, 3 H, -(CH<sub>2</sub>)<sub>3</sub>-Ph), 1.20 (m, 2 H, -(CH<sub>2</sub>)<sub>3</sub>-Ph), 0.97 (d, 9 H,  $J_{\text{P-H}} = 14.12$  Hz, -C(CH<sub>3</sub>)<sub>3</sub>). **<sup>31</sup>P{<sup>1</sup>H} NMR** (C<sub>6</sub>D<sub>6</sub>, 293 K):  $\delta$  [ppm] = 4.5 (s). **<sup>31</sup>P NMR** (C<sub>6</sub>D<sub>6</sub>, 293 K):  $\delta$  [ppm] = 4.5 (s, br). **<sup>13</sup>C{<sup>1</sup>H} NMR** (C<sub>6</sub>D<sub>6</sub>, 293 K):  $\delta$  [ppm] = 142.4 (s, Ph), 139.7 (d,  $^2J_{\text{P-C}} = 7.8$  Hz, Ph), 129.4 (d,  $^3J_{\text{P-C}} = 6.8$  Hz, Ph), 128.3 (d,  $^2J_{\text{P-C}} = 9.8$  Hz, Ph), 128.2 (d,  $^3J_{\text{P-C}} = 6.2$  Hz, Ph), 125.6 (s, Ph), 125.5 (d,  $^4J_{\text{P-C}} = 2.2$  Hz, Ph), 35.6 (s, -(CH<sub>2</sub>)-Ph), 33.0 (d,  $^1J_{\text{P-C}} = 12.0$  Hz, P-(CH<sub>2</sub>)-Ph), 32.3 (d,  $^1J_{\text{P-C}} = 22.3$  Hz, P-(CH)-(CH<sub>3</sub>)<sub>2</sub>-Ph), 27.8 (d,  $J_{\text{P-C}} = 14.7$  Hz), 27.2 (d,  $J_{\text{P-C}} = 14.7$  Hz), 27.2 (d,  $J_{\text{P-C}} = 19.1$  Hz), 27.1 (d,  $J_{\text{P-C}} = 13.2$  Hz), 23.9 (d,  $^2J_{\text{P-C}} = 20.5$  Hz, P-C(CH<sub>3</sub>)<sub>3</sub>).

#### Synthesis of SP<sup>+</sup>BuBn((CH<sub>2</sub>)<sub>4</sub>Ph) (6')

Compound **6** was synthesised *in situ* according to previous experimental details (0.18 mmol, 1 eq) and dissolved in 5 mL of *n*-pentane. Sulfur (0.18 mmol, 5.8 mg, 1 eq) was dissolved in 2 mL of *n*-pentane and added to compound **6** at room temperature. The reaction mixture is stirred for one hour. The solvent is reduced *in vacuo* and stored at  $-30\text{ }^{\circ}\text{C}$ . Compound **6'** can be isolated as colourless blocks after three days. Yield: 51.7 mg (0.15 mmol, 83 %).

**<sup>1</sup>H NMR** (C<sub>6</sub>D<sub>6</sub>, 293 K):  $\delta$  [ppm] = 7.35 (m, 2 H, -Ph), 7.05 (m, 7 H, -Ph), 2.86 (d, 1 H,  $^2J_{\text{P-H}} = 6.37$  Hz, P-CH<sub>2</sub>-Ph), 2.86 (d, 1 H,  $^2J_{\text{P-H}} = 6.37$  Hz, P-CH<sub>2</sub>-Ph), 2.83 (d, 1 H,  $^2J_{\text{P-H}} = 3.84$  Hz, P-CH<sub>2</sub>-Ph), 2.28 (m, 2 H, -CH<sub>2</sub>-Ph), 1.59 (m, 2 H, -(CH<sub>2</sub>)<sub>3</sub>-Ph), 1.35 (m, 3 H, -(CH<sub>2</sub>)<sub>3</sub>-Ph), 1.11 (m, 2 H, -(CH<sub>2</sub>)<sub>3</sub>-Ph), 0.98 (d, 9 H,  $J_{\text{P-H}} = 15.25$  Hz, -C(CH<sub>3</sub>)<sub>3</sub>). **<sup>31</sup>P{<sup>1</sup>H} NMR** (C<sub>6</sub>D<sub>6</sub>, 293 K):  $\delta$  [ppm] = 63.5 (s). **<sup>31</sup>P NMR** (C<sub>6</sub>D<sub>6</sub>, 293 K):  $\delta$  [ppm] = 63.5 (s, br). **<sup>13</sup>C{<sup>1</sup>H} NMR** (C<sub>6</sub>D<sub>6</sub>, 293 K):  $\delta$  [ppm] = 142.2 (s, Ph), 132.9 (d,  $^2J_{\text{P-C}} = 7.5$  Hz, Ph), 130.2 (d,  $^3J_{\text{P-C}} = 4.7$  Hz, Ph), 128.3 (d,  $^2J_{\text{P-C}} = 7.0$  Hz, Ph), 126.8 (d,  $^4J_{\text{P-C}} = 3.0$  Hz, Ph), 125.7 (s, Ph), 35.8 (d,  $^1J_{\text{P-C}} = 41.8$  Hz, P-(CH<sub>2</sub>)-Ph), 35.4 (s, -(CH<sub>2</sub>)-Ph), 33.9 (d,  $^1J_{\text{P-C}} = 47.8$  Hz, P-(CH)-(CH<sub>3</sub>)<sub>2</sub>-Ph), 32.9 (d,  $J_{\text{P-C}} = 14.0$  Hz), 25.6 (d,  $^2J_{\text{P-C}} = 20.5$  Hz, P-C(CH<sub>3</sub>)<sub>3</sub>), 24.7 (d,  $J_{\text{P-C}} = 0.2$  Hz), 22.9 (d,  $J_{\text{P-C}} = 3.6$  Hz).

**GC-MS** (CH<sub>2</sub>Cl<sub>2</sub>):  $m/z = 344.17$  (15 %, [M]<sup>+</sup>), 91.06 (100 %, [Bn]<sup>+</sup>), 57.07 (15 %, [<sup>t</sup>Bu]<sup>+</sup>), 312.20 (5 %, [M-S]<sup>+</sup>). Elemental analysis (calcd., found for C<sub>21</sub>H<sub>29</sub>SP): C (73.22, 70.23), H (8.49, 7.50), S (9.31, 12.01).

#### Synthesis of [Cp<sup>+</sup>Fe{ $\eta^4$ -P<sub>5</sub>((CH<sub>2</sub>)<sub>3</sub>CN)<sub>2</sub>}] (7):

Complex **I** (0.15 mmol, 90.7 mg, 1 eq) was dissolved in DME, cooled to  $-50\text{ }^{\circ}\text{C}$  and a 0.1093 molar solution of 4-Bromobutyronitrile in DME (0.3 mmol, 2.75 mL, 2 eq) was added. Thereby the colour change to red/brown and a colourless solid formed. The solution was allowed to stir over night. The solvent was removed under reduced pressure and the brown residue was washed with 3 x 10 mL of *n*-pentane. The residue was dissolved in 5 mL of toluene, filtered over diatomaceous earth, layered with 5 mL of *n*-pentane and stored at  $-30\text{ }^{\circ}\text{C}$ . Compound **7** can be isolated as dark green blocks after washing with 10 mL of *n*-hexane in order to remove residues of **I'**.

Yield: 46.0 mg (0.096 mmol, 64 %).

**<sup>1</sup>H NMR** (C<sub>6</sub>D<sub>6</sub>, 293 K):  $\delta$  [ppm] = 2.02 (m, 2 H, -(CH<sub>2</sub>)<sub>2</sub>CH<sub>2</sub>CN), 1.63 (s, 15 H, C<sub>5</sub>(CH<sub>3</sub>)<sub>5</sub>), 1.48 (t, 2 H, -(CH<sub>2</sub>)<sub>2</sub>CH<sub>2</sub>CN,  $J_{\text{H-H}} = 6.52$  Hz), 1.32 (m, 2 H, -(CH<sub>2</sub>)<sub>2</sub>CH<sub>2</sub>CN), 1.05 (t, 2 H, -(CH<sub>2</sub>)<sub>2</sub>CH<sub>2</sub>CN,  $J_{\text{H-H}} = 6.70$  Hz), 0.59 (m, 2 H, -(CH<sub>2</sub>)<sub>2</sub>CH<sub>2</sub>CN), 0.25 (m, 2 H, -(CH<sub>2</sub>)<sub>2</sub>CH<sub>2</sub>CN). **<sup>31</sup>P{<sup>1</sup>H} NMR** (C<sub>6</sub>D<sub>6</sub>, 293 K):  $\delta$  [ppm] = 133.7 (m, 1 P, P<sub>A</sub>), 37.0 (m, 2 P, P<sub>M,M</sub>), -129.2 (m, 2 P, P<sub>X,X</sub>). **<sup>31</sup>P NMR** (C<sub>6</sub>D<sub>6</sub>, 293 K):  $\delta$  [ppm] = 133.7 (m, 1 P, P<sub>A</sub>), 37.0 (m, 2 P, P<sub>M,M</sub>), -129.2 (m, 2 P, P<sub>X,X</sub>). For coupling constants, see **Table S13**. **LIFDI-MS** (toluene):  $m/z = 482.01$  (100 %, [M]<sup>+</sup>), 964.05 (2 %, [M]<sub>2</sub><sup>+</sup>). Elemental analysis (calcd., found for C<sub>18</sub>H<sub>27</sub>FeP<sub>5</sub>N<sub>2</sub>): C (44.84, 45.34), H (5.64, 5.23), N (5.81, 6.00).

**Synthesis of  $[\{\text{Cp}^*\text{Fe}\{\eta^4\text{-P}_5((\text{CH}_2)_3\text{CN})_2\}\}\text{ZnBr}_2]$  (**8**):**

Compound **7** (0.15 mmol, 72.3 mg, 1 eq) and  $\text{ZnBr}_2$  (0.15 mmol, 72.3 mg, 1 eq) were dissolved separately in 10 mL THF. The solution of **7** was added to  $\text{ZnBr}_2$ . A colour change was not observed and the solution was allowed to stir for 1 hour. The solvent was removed under reduced pressure and a brown oil was dissolved in 3 mL  $\text{CH}_2\text{Cl}_2$ , layered with 10 mL toluene and stored at room temperature.  $[\{\text{Cp}^*\text{Fe}\{\eta^4\text{-P}_5((\text{CH}_2)_3\text{CN})_2\}\}\text{ZnBr}_2]$  (**8**) was formed as dark green/brownish plates after three days.

Yield: 86.5 mg (0.122 mmol, 81 %).

**$^1\text{H}$  NMR** (THF- $d_8$ , 293 K):  $\delta$  [ppm] = 2.78 (m, 2 H,  $-(\text{CH}_2)_2\text{CH}_2\text{CN}$ ), 2.69 (t, 2 H,  $-(\text{CH}_2)_2\text{CH}_2\text{CN}$ ,  $J_{\text{H-H}} = 6.88$  Hz), 2.21 (t, 2 H,  $-(\text{CH}_2)_2\text{CH}_2\text{CN}$ ,  $J_{\text{H-H}} = 6.88$  Hz), 2.17 (m, 2 H,  $-(\text{CH}_2)_2\text{CH}_2\text{CN}$ ), 1.63 (s, 15 H,  $\text{C}_5(\text{CH}_3)_5$ ), 1.20 (m, 2 H,  $-(\text{CH}_2)_2\text{CH}_2\text{CN}$ ), 1.06 (m, 2 H,  $-(\text{CH}_2)_2\text{CH}_2\text{CN}$ ).  **$^{31}\text{P}\{^1\text{H}\}$  NMR** ( $\text{C}_6\text{D}_6$ , 293 K):  $\delta$  [ppm] = 137.9 (m, 1 P,  $\text{P}_A$ ), 36.3 (m, 2 P,  $\text{P}_{M,M'}$ ), -130.3 (m, 2 P,  $\text{P}_{X,X'}$ ).  **$^{31}\text{P}$  NMR** ( $\text{C}_6\text{D}_6$ , 293 K):  $\delta$  [ppm] = 137.9 (m, 1 P,  $\text{P}_A$ ), 36.3 (m, 2 P,  $\text{P}_{M,M'}$ ), -130.3 (m, 2 P,  $\text{P}_{X,X'}$ ). For coupling constants, see **Table S14**. **LIFDI-MS** ( $o$ -DFB):  $m/z = 482.01$  (100 %, [**7**] $^+$ ). Elemental analysis (calcd., found for  $\text{C}_{18}\text{H}_{27}\text{FeP}_5\text{N}_2\text{ZnBr}_2$ ): C (30.69, 30.98), H (3.87, 3.91), N (3.78, 3.93).



## NMR spectroscopic characterization

### $^1\text{H}$ NMR Spectra:

$[\text{K}(\text{18c6})(\text{thf})][\text{Cp}^*\text{Fe}(\eta^4\text{-P}_5\text{-C}\equiv\text{CPh})]$  (**1c**)

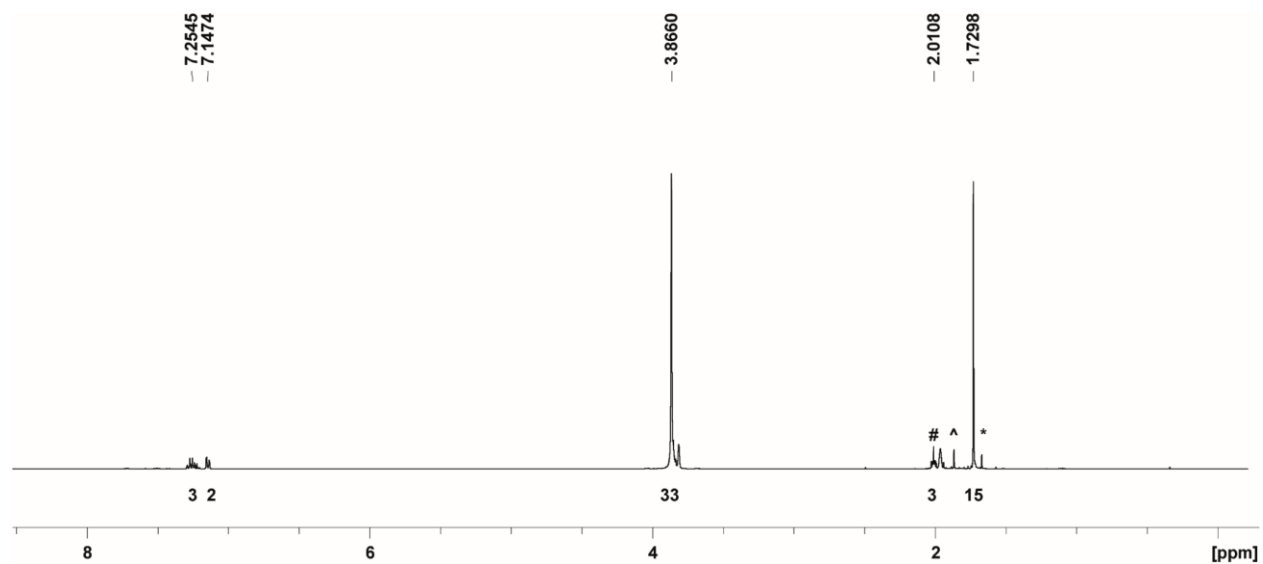

**Fig. S1.** Experimental  $^1\text{H}$  NMR (400.13 MHz,  $\text{THF-d}_8$ ) spectrum of **1c** (# = THF, ^ = unidentified impurity, \* = I).

$[\text{Cp}^*\text{Fe}(\eta^4\text{-P}_5\text{tBu}(\text{CH}_2)_3\text{Br})]$  (**2a**)

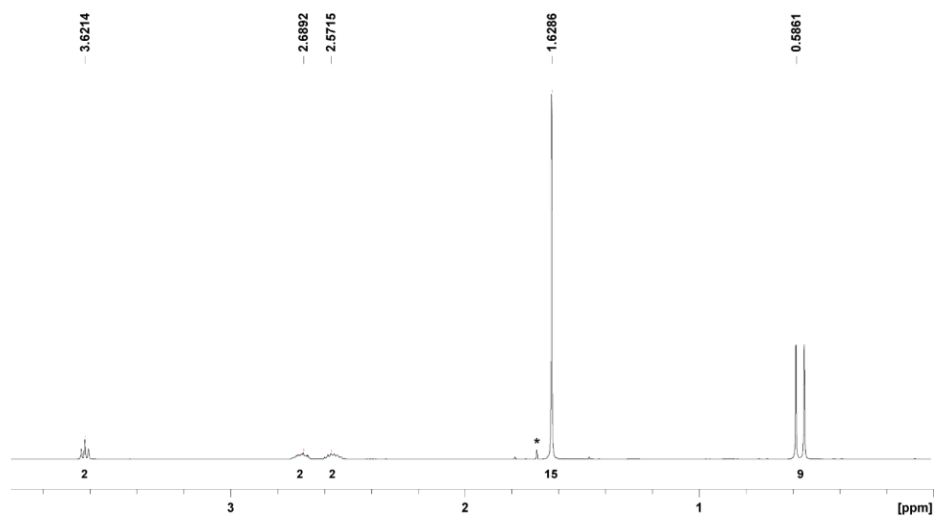

**Fig. S2.** Experimental  $^1\text{H}$  NMR (400.13 MHz,  $\text{CD}_2\text{Cl}_2$ ) spectrum of **2a** (\* = I).

[Cp\*Fe( $\eta^4$ -P<sub>5</sub>Me(CH<sub>2</sub>)<sub>3</sub>Br)] (**2b**)

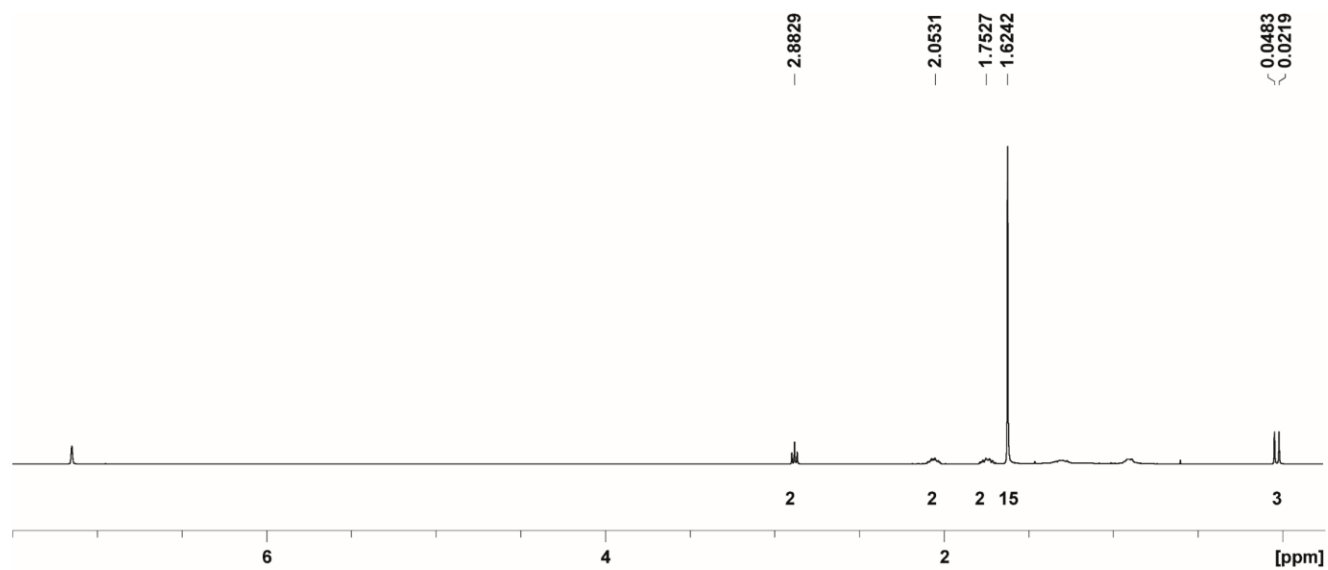

**Fig. S3.** Experimental <sup>1</sup>H NMR (400.13 MHz, C<sub>6</sub>D<sub>6</sub>) spectrum of **2b**.

[Cp\*Fe{ $\eta^4$ -P<sub>5</sub>(-C≡CPh)Me}] (**2c**)

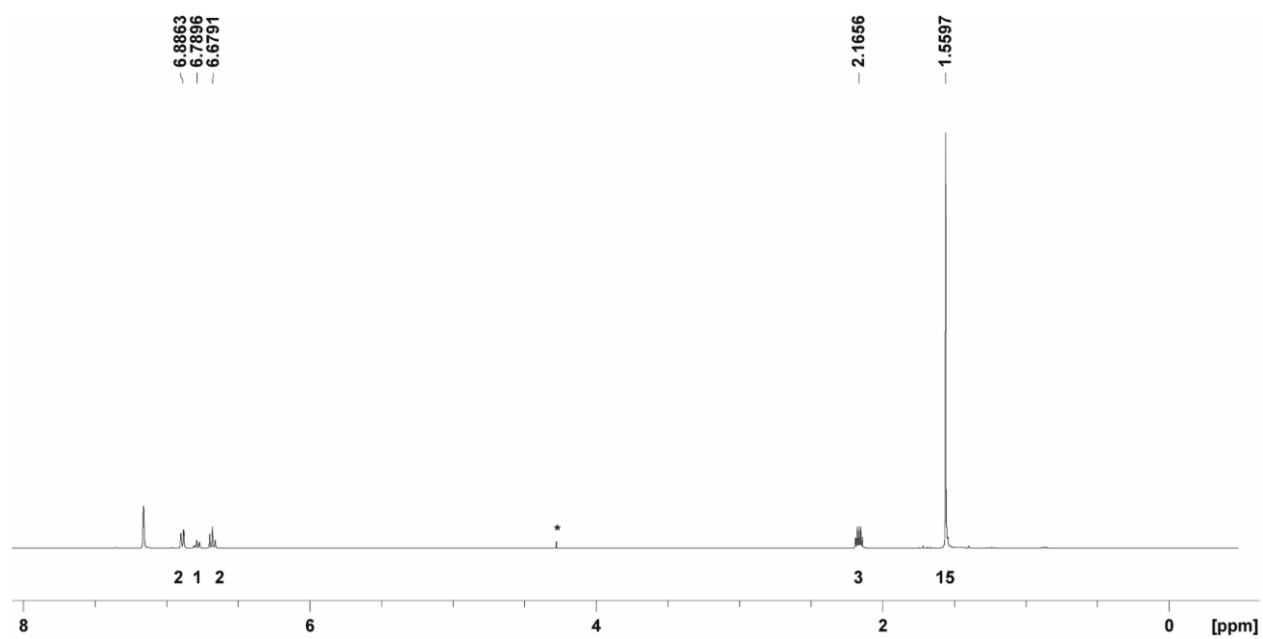

**Fig. S4.** Experimental <sup>1</sup>H NMR (400.13 MHz, C<sub>6</sub>D<sub>6</sub>) spectrum of **2c** (\* = CH<sub>2</sub>Cl<sub>2</sub>).

[Cp\*Fe{η<sup>4</sup>-P<sub>5</sub>Me(CH<sub>2</sub>)<sub>3</sub>CN}] (**2d**)

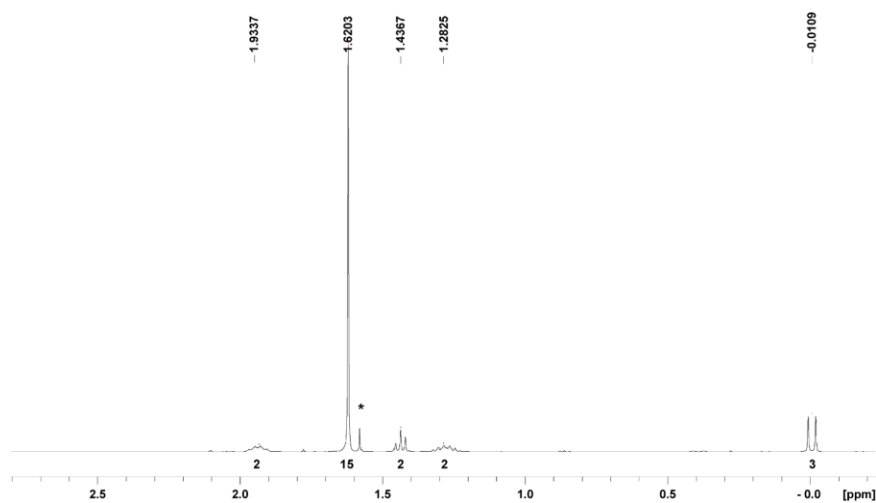

Fig. S5. Experimental <sup>1</sup>H NMR (400.13 MHz, C<sub>6</sub>D<sub>6</sub>) spectrum of **2d** (\* = I).

[Cp\*Fe{(η<sup>4</sup>-P<sub>5</sub>Me(CH<sub>2</sub>)<sub>4</sub>Br)}] (**2e**)

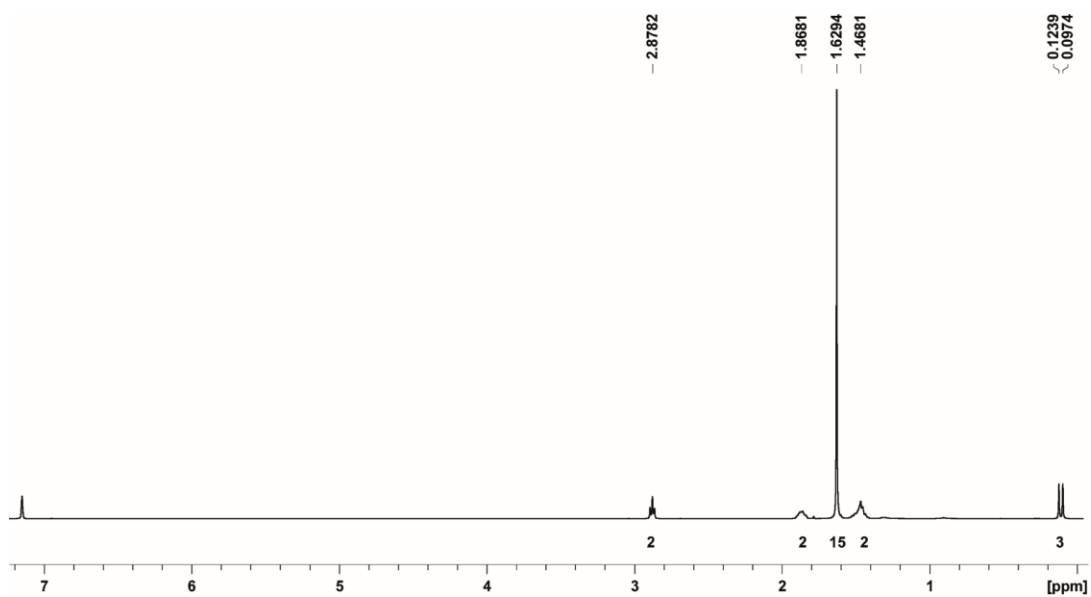

Fig. S6. Experimental <sup>1</sup>H NMR (400.13 MHz, C<sub>6</sub>D<sub>6</sub>) spectrum of **2e**.

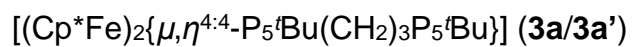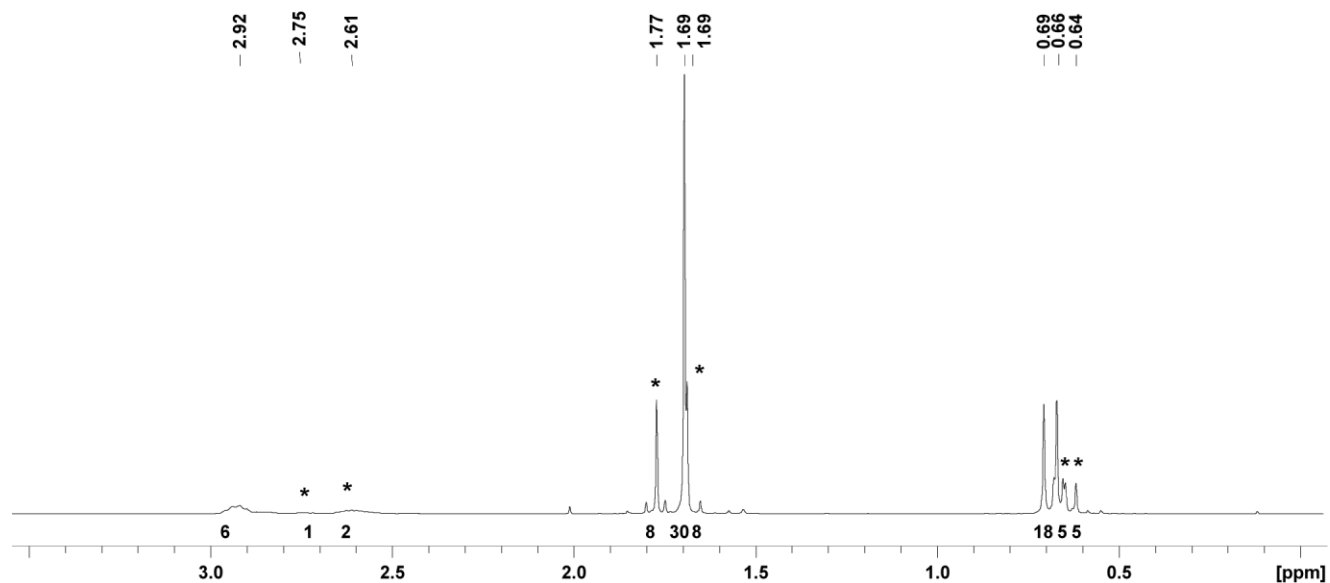

**Fig. S7.** Experimental  $^1\text{H}$  NMR (400.13 MHz,  $\text{CD}_2\text{Cl}_2$ ) spectrum of **3a** ( $*$  = **3a'**).

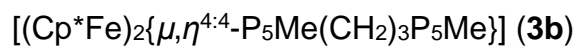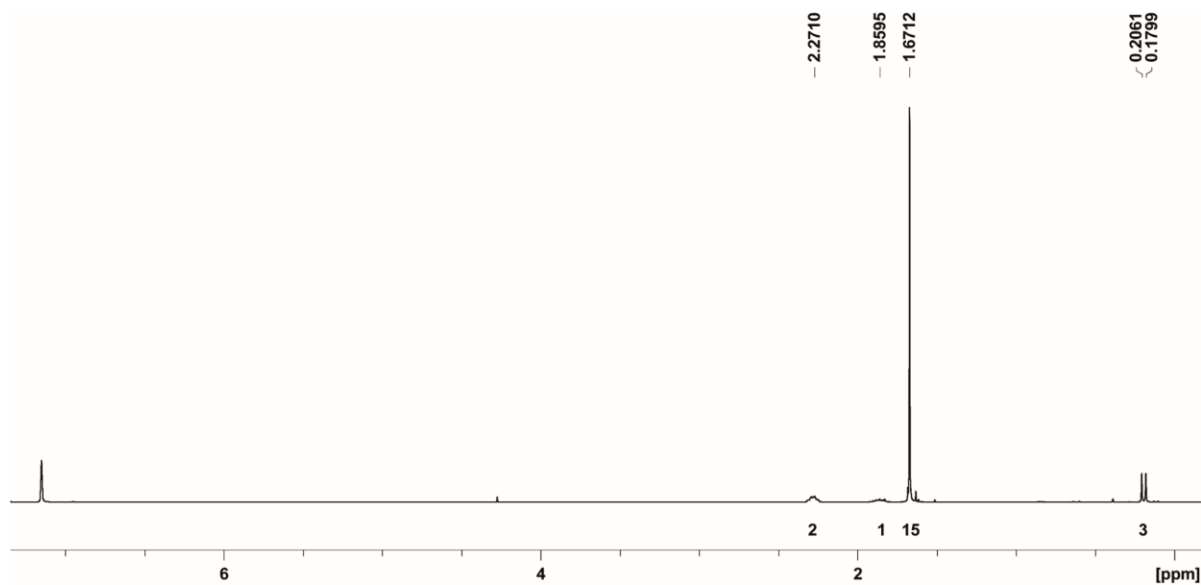

**Fig. S8.** Experimental  $^1\text{H}$  NMR (400.13 MHz,  $\text{CD}_2\text{Cl}_2$ ) spectrum of **3b**.

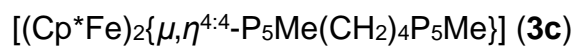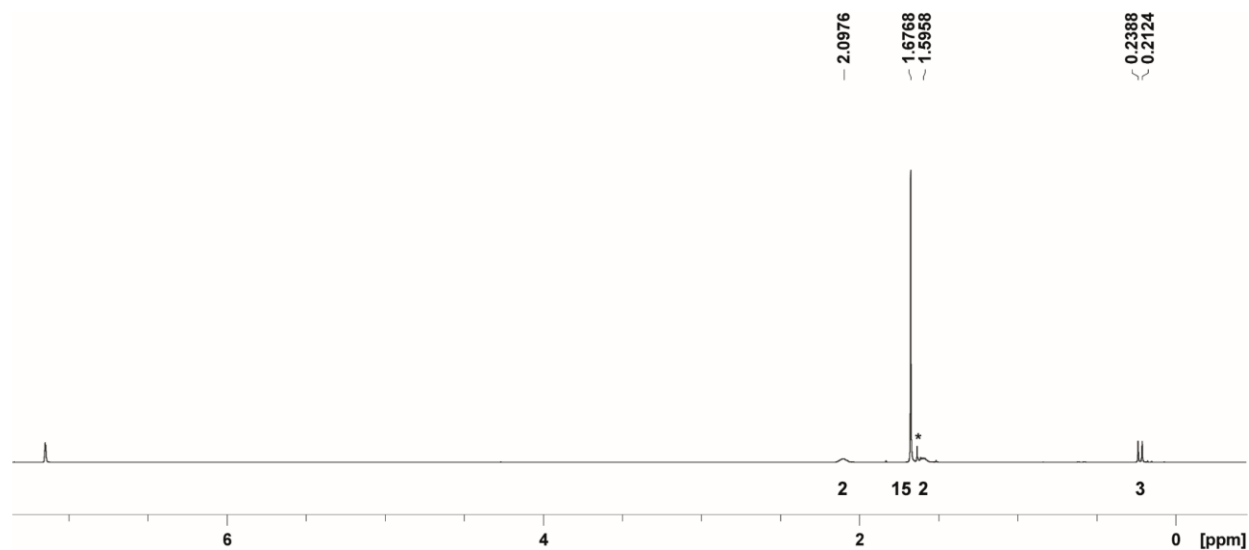

**Fig. S9.** Experimental  $^1\text{H}$  NMR (400.13 MHz,  $\text{CD}_2\text{Cl}_2$ ) spectrum of **3c** (\* =  $\text{CH}_2\text{Cl}_2$ ; \* = **3c'**).

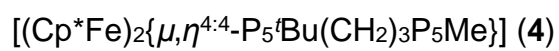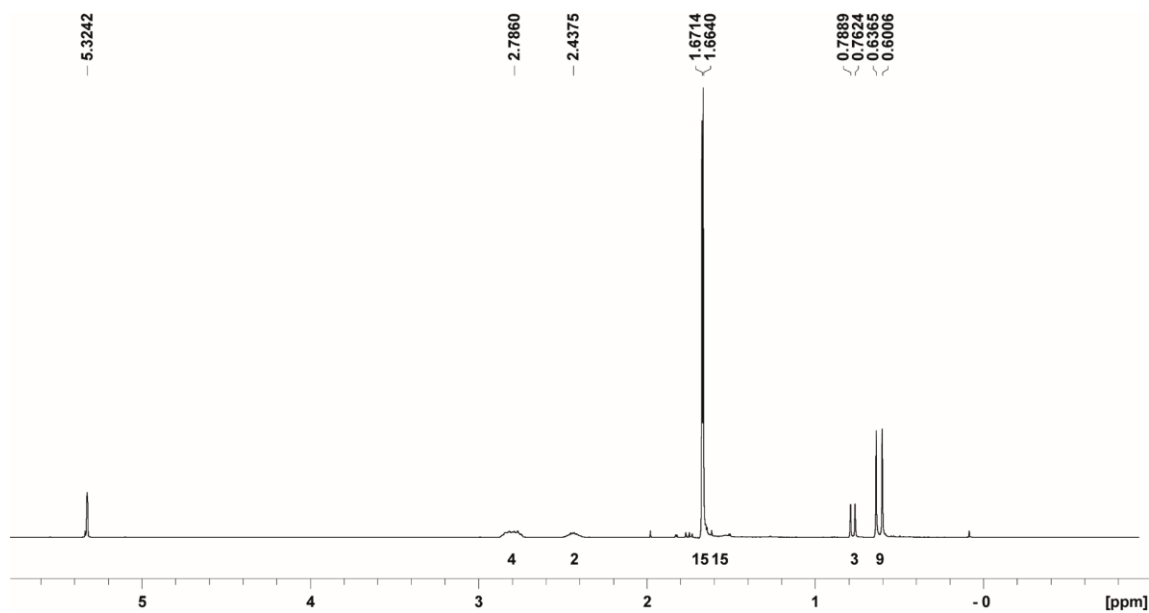

**Fig. S10.** Experimental  $^1\text{H}$  NMR (400.13 MHz,  $\text{CD}_2\text{Cl}_2$ ) spectrum of **4**.

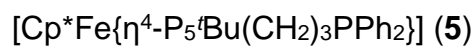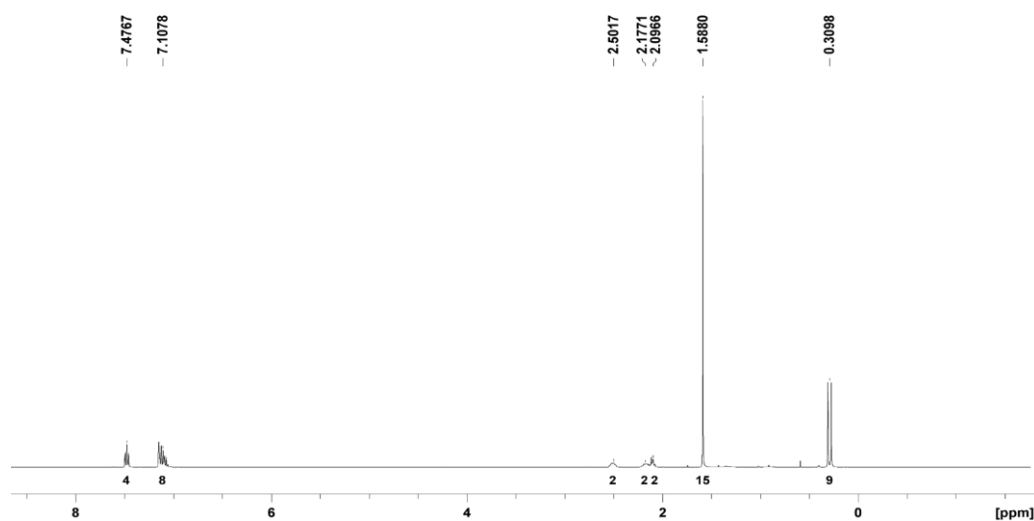

Fig. S11. Experimental <sup>1</sup>H NMR (400.13 MHz, C<sub>6</sub>D<sub>6</sub>) spectrum of 5.

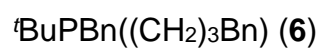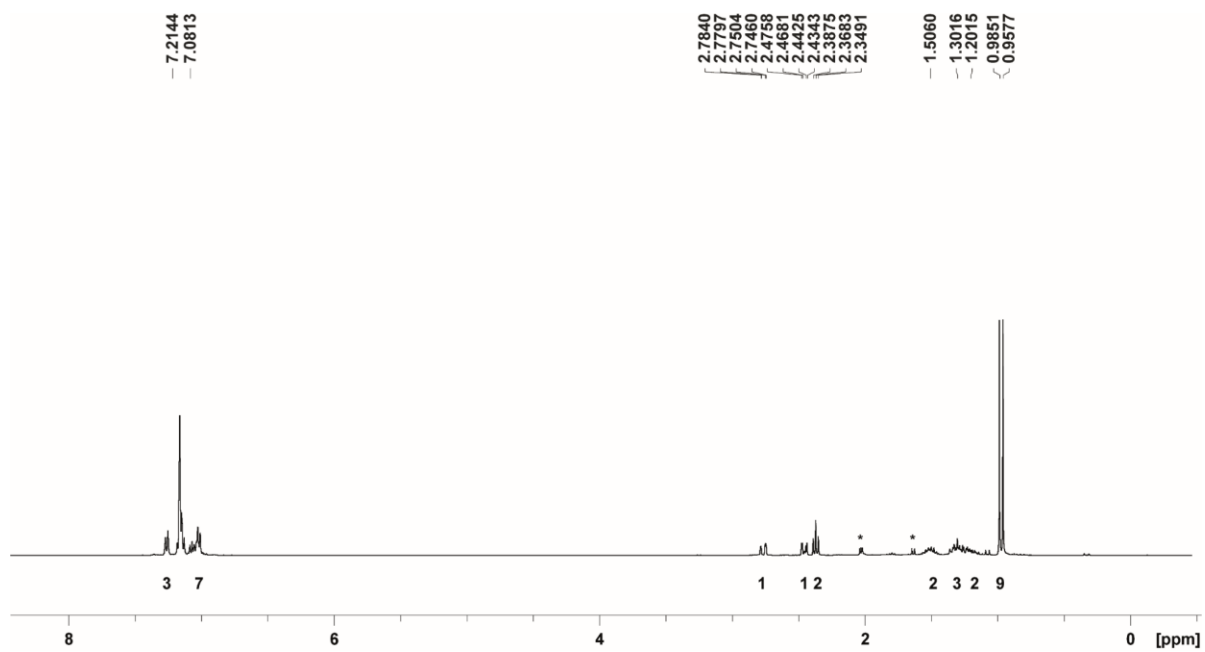

Fig. S12. Experimental <sup>1</sup>H NMR (400.13 MHz, C<sub>6</sub>D<sub>6</sub>) spectrum of 6 (\* = unidentified sideproduct).

SP<sup>t</sup>BuBn((CH<sub>2</sub>)<sub>3</sub>Bn) (**6'**)

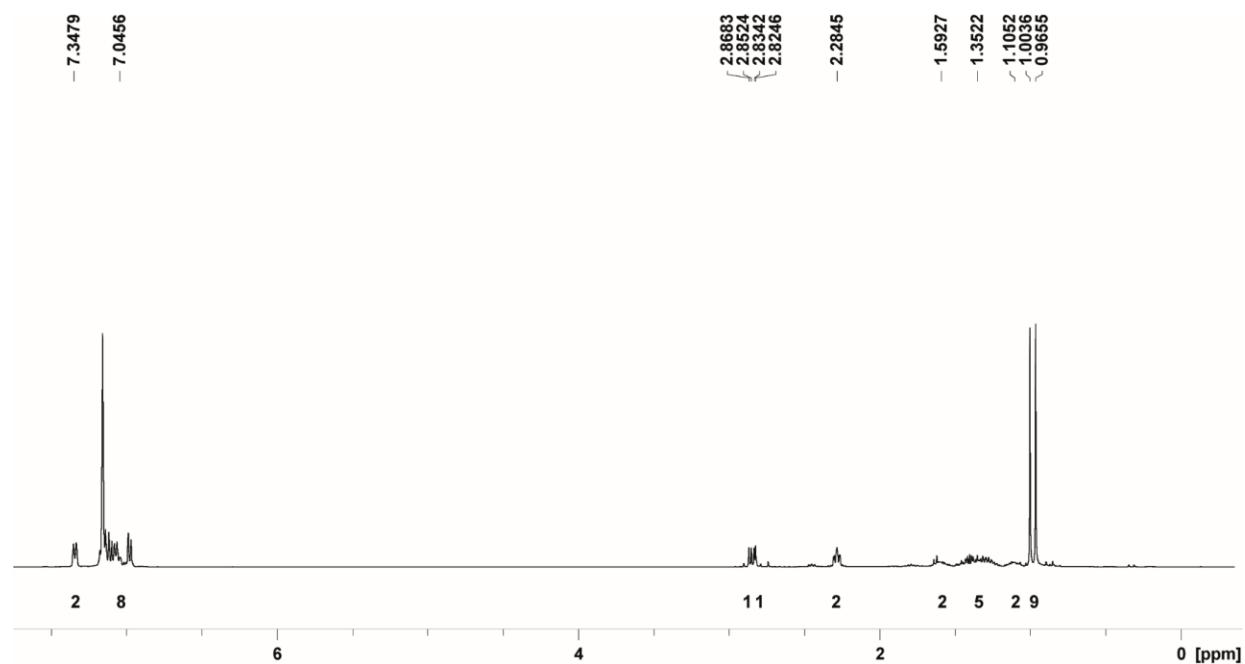

Fig. S13. Experimental <sup>1</sup>H NMR (400.13 MHz, C<sub>6</sub>D<sub>6</sub>) spectrum of **6'**.

[Cp\*Fe{η<sup>4</sup>-P<sub>5</sub>((CH<sub>2</sub>)<sub>3</sub>CN)<sub>2</sub>}] (**7**)

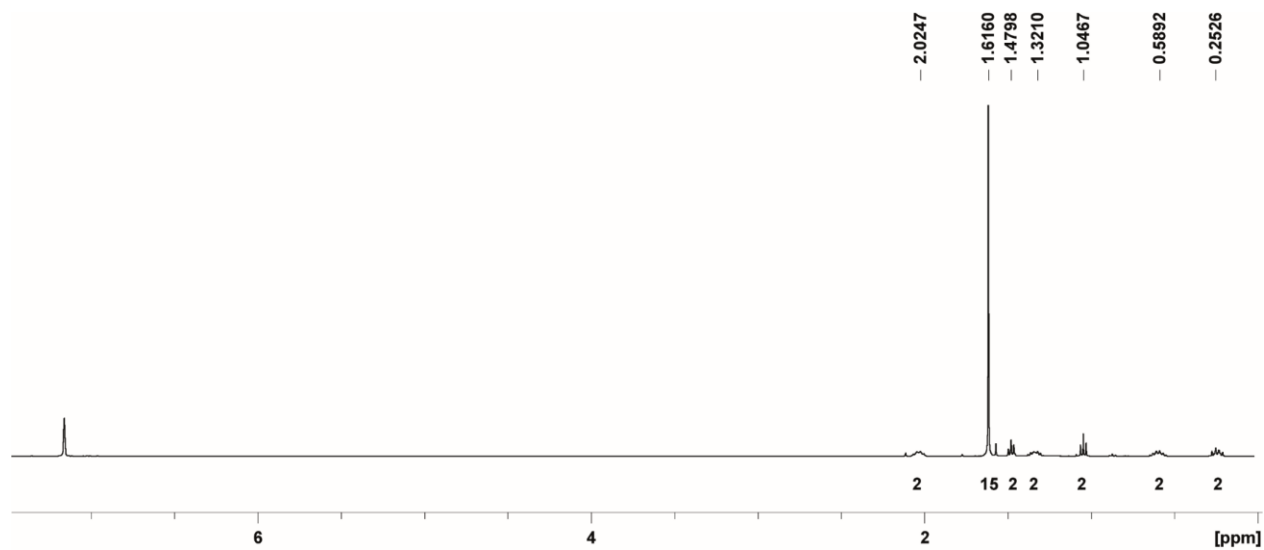

Fig. S14. Experimental <sup>1</sup>H NMR (400.13 MHz, C<sub>6</sub>D<sub>6</sub>) spectrum of **7**.

[Cp\*Fe{η<sup>4</sup>-P<sub>5</sub>((CH<sub>2</sub>)<sub>3</sub>CN)<sub>2</sub>}ZnBr<sub>2</sub>] (**8**)

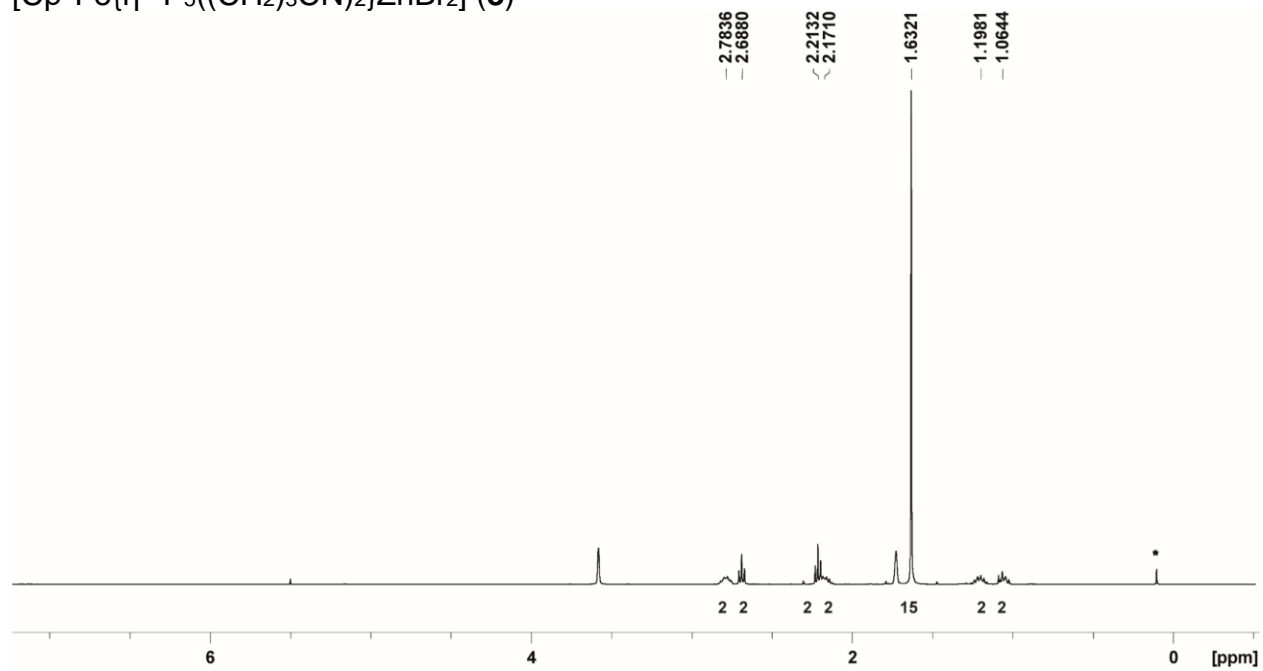

**Fig. S15.** Experimental <sup>1</sup>H NMR (400.13 MHz, THF-d<sub>8</sub>) spectrum of **8** (\* = grease).



### <sup>31</sup>P NMR Spectra:

[K(18c6)(thf)][Cp\*Fe(η<sup>4</sup>-P<sub>5</sub>-C≡CPh)] (1c)

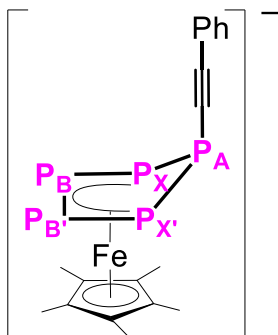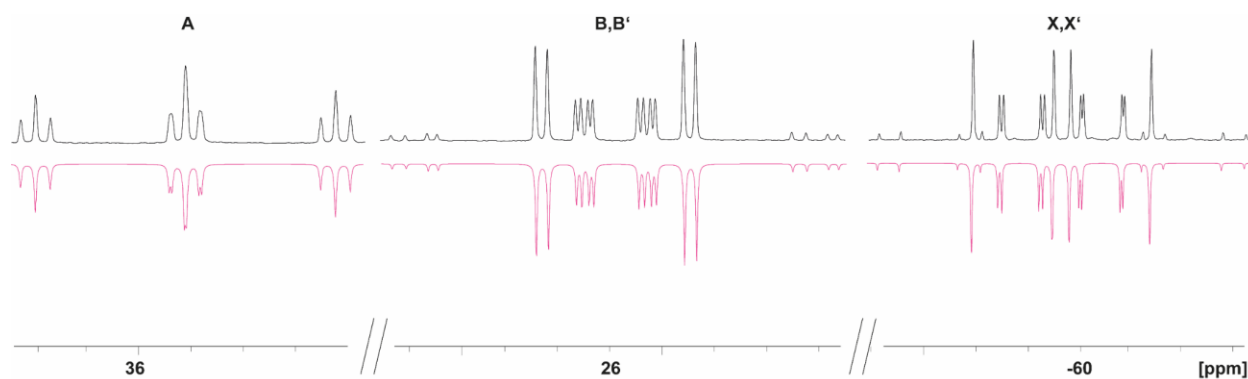

**Fig. S16.** Experimental (top) and simulated (bottom) <sup>31</sup>P{<sup>1</sup>H} NMR (161.98 MHz, THF-d<sub>8</sub>) spectrum of the anion of **1c**. (for a better resolution, **1** was reacted with Li-C≡CPh in THF-d<sub>8</sub>).

**Table S1.** Chemical shifts and coupling constants obtained from the simulation (R-factor = 2.43 %) in Figure S16.

| <i>J</i> [Hz]                                                 |        |                                                                |        | <i>δ</i> [ppm] |       |
|---------------------------------------------------------------|--------|----------------------------------------------------------------|--------|----------------|-------|
| <sup>1</sup> <i>J</i> <sub>P<sub>A</sub>,P<sub>X</sub></sub>  | 305.0  | <sup>1</sup> <i>J</i> <sub>P<sub>B</sub>,P<sub>X</sub></sub>   | 377.5  | X, X'          | -59.3 |
| <sup>1</sup> <i>J</i> <sub>P<sub>A</sub>,P<sub>X'</sub></sub> | 301.58 | <sup>1</sup> <i>J</i> <sub>P<sub>B'</sub>,P<sub>X'</sub></sub> | 377.5  |                |       |
| <sup>2</sup> <i>J</i> <sub>P<sub>A</sub>,P<sub>B</sub></sub>  | -48.37 | <sup>2</sup> <i>J</i> <sub>P<sub>B</sub>,P<sub>X</sub></sub>   | -21.25 | B, B'          | 26.0  |
| <sup>2</sup> <i>J</i> <sub>P<sub>A</sub>,P<sub>B'</sub></sub> | -31.74 | <sup>2</sup> <i>J</i> <sub>P<sub>B</sub>,P<sub>X'</sub></sub>  | -2.30  |                |       |
| <sup>1</sup> <i>J</i> <sub>P<sub>B</sub>,P<sub>B'</sub></sub> | 418.99 | <sup>2</sup> <i>J</i> <sub>P<sub>X</sub>,P<sub>X'</sub></sub>  | -48.37 | A              | 35.7  |

[Cp\*Fe{η<sup>4</sup>-P<sub>5</sub><sup>t</sup>Bu(CH<sub>2</sub>)<sub>3</sub>Br}] (**2a**)

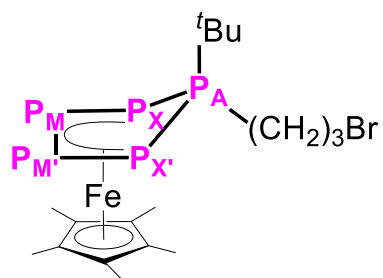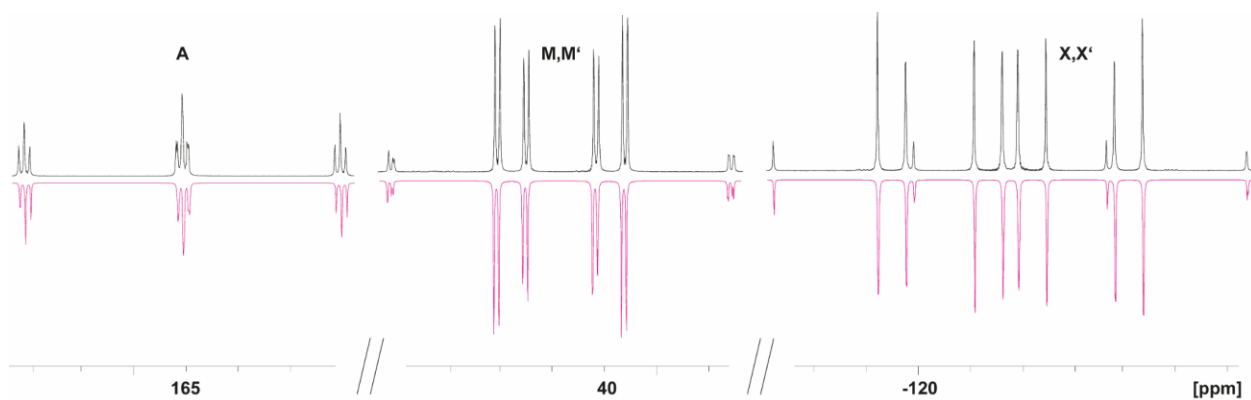

**Fig. S17.** Experimental (top) and simulated (bottom) <sup>31</sup>P NMR (161.98 MHz, CD<sub>2</sub>Cl<sub>2</sub>) spectrum of **2a**.

**Table S2.** Chemical shifts and coupling constants obtained from the simulation (R-factor = 0.27 %) in Figure S17.

| <i>J</i> [Hz]                                                 |        |                                                               |        | $\delta$ [ppm]                                                |        |
|---------------------------------------------------------------|--------|---------------------------------------------------------------|--------|---------------------------------------------------------------|--------|
| <sup>1</sup> <i>J</i> <sub>P<sub>A</sub>,P<sub>X</sub></sub>  | 410.20 | <sup>1</sup> <i>J</i> <sub>P<sub>A</sub>,P<sub>X</sub></sub>  | 410.20 | <sup>1</sup> <i>J</i> <sub>P<sub>A</sub>,P<sub>X</sub></sub>  | 410.20 |
| <sup>1</sup> <i>J</i> <sub>P<sub>A</sub>,P<sub>X'</sub></sub> | 410.36 | <sup>1</sup> <i>J</i> <sub>P<sub>A</sub>,P<sub>X'</sub></sub> | 410.36 | <sup>1</sup> <i>J</i> <sub>P<sub>A</sub>,P<sub>X'</sub></sub> | 410.36 |
| <sup>2</sup> <i>J</i> <sub>P<sub>A</sub>,P<sub>M</sub></sub>  | 14.77  | <sup>2</sup> <i>J</i> <sub>P<sub>A</sub>,P<sub>M'</sub></sub> | 14.77  | <sup>2</sup> <i>J</i> <sub>P<sub>A</sub>,P<sub>M'</sub></sub> | 14.77  |
| <sup>2</sup> <i>J</i> <sub>P<sub>A</sub>,P<sub>M'</sub></sub> | 13.31  | <sup>2</sup> <i>J</i> <sub>P<sub>A</sub>,P<sub>M</sub></sub>  | 13.31  | <sup>2</sup> <i>J</i> <sub>P<sub>A</sub>,P<sub>M</sub></sub>  | 13.31  |
| <sup>1</sup> <i>J</i> <sub>P<sub>M</sub>,P<sub>M'</sub></sub> | 386.77 | <sup>1</sup> <i>J</i> <sub>P<sub>M</sub>,P<sub>M'</sub></sub> | 386.77 | <sup>1</sup> <i>J</i> <sub>P<sub>M</sub>,P<sub>M'</sub></sub> | 386.77 |

[Cp\*Fe{η<sup>4</sup>-P<sub>5</sub>Me(CH<sub>2</sub>)<sub>3</sub>Br}] (**2b**)

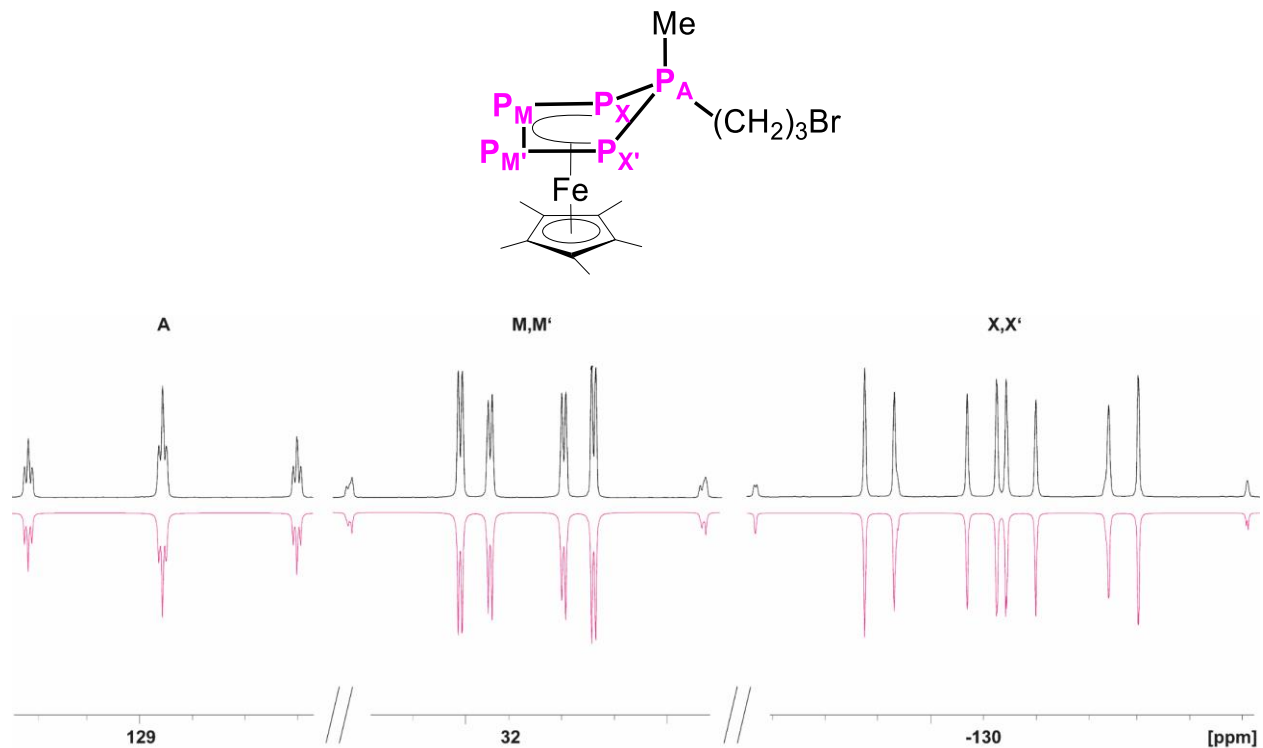

**Fig. S18.** Experimental (top) and simulated (bottom) <sup>31</sup>P{<sup>1</sup>H} NMR (161.98 MHz, C<sub>6</sub>D<sub>6</sub>) spectrum of **2b**.

**Table S3.** Coupling constants obtained from the simulation (R-factor = 2.02 %) in Figure S18.

| J [Hz]                           |        |                                   |        | δ [ppm] |        |
|----------------------------------|--------|-----------------------------------|--------|---------|--------|
| <sup>1</sup> J <sub>PA,PX</sub>  | 387.09 | <sup>1</sup> J <sub>PM,PX</sub>   | 399.39 | X, X'   | -130.3 |
| <sup>1</sup> J <sub>PA,PX'</sub> | 387.32 | <sup>1</sup> J <sub>PM',PX'</sub> | 398.72 |         |        |
| <sup>2</sup> J <sub>PA,PM</sub>  | -10.20 | <sup>2</sup> J <sub>PM',PX</sub>  | -38.00 | M, M'   | 32.0   |
| <sup>2</sup> J <sub>PA,PM'</sub> | -11.42 | <sup>2</sup> J <sub>PM,PX'</sub>  | -37.62 |         |        |
| <sup>1</sup> J <sub>PM,PM'</sub> | 379.54 | <sup>2</sup> J <sub>PX,PX'</sub>  | 2.56   | A       | 128.9  |

[Cp\*Fe{η<sup>4</sup>-P<sub>5</sub>(-C≡CPh)Me}] (**2c**)

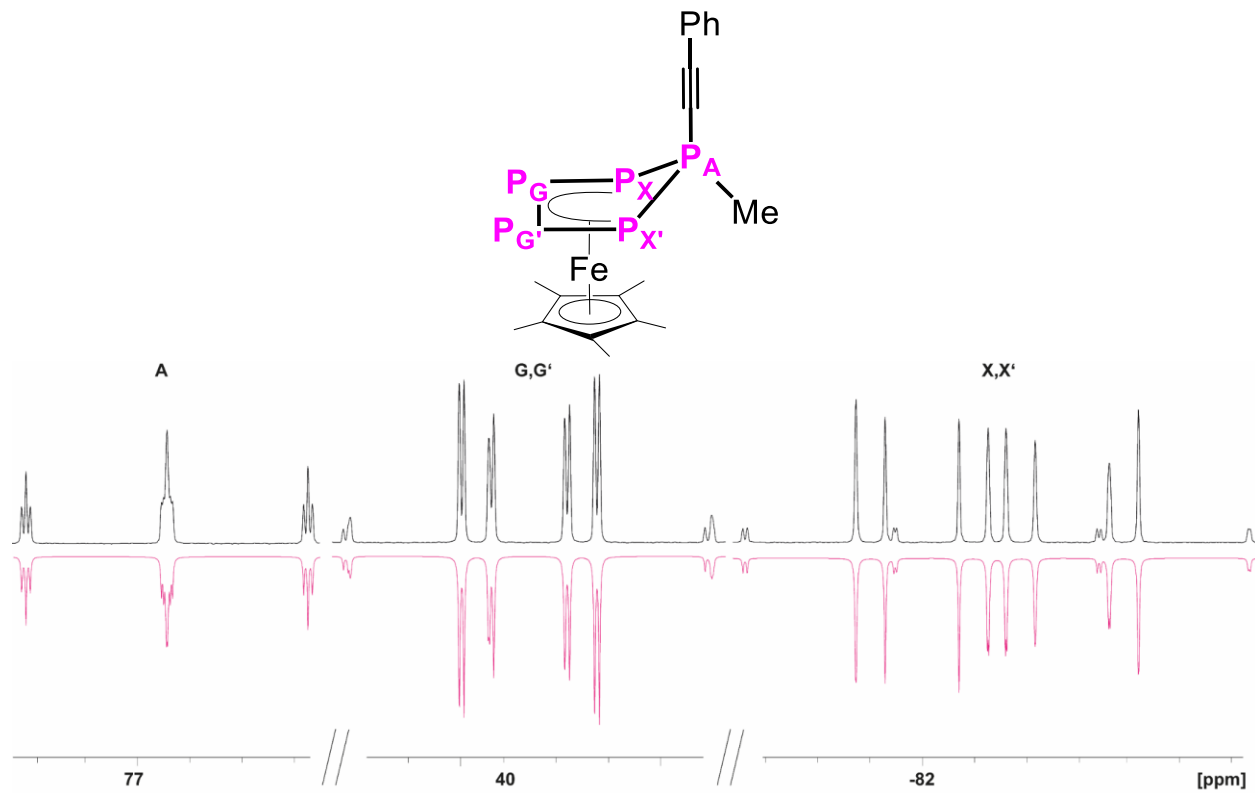

**Fig. S19.** Experimental (top) and simulated (bottom) <sup>31</sup>P{<sup>1</sup>H} NMR (161.98 MHz, C<sub>6</sub>D<sub>6</sub>) spectrum of **2c**.

**Table S4.** Coupling constants obtained from the simulation (R-factor = 2.68 %) in Figure S19.

| <i>J</i> [Hz]                                                 |        |                                                                |        | $\delta$ [ppm] |       |
|---------------------------------------------------------------|--------|----------------------------------------------------------------|--------|----------------|-------|
| <sup>1</sup> <i>J</i> <sub>P<sub>A</sub>,P<sub>X</sub></sub>  | 414.97 | <sup>1</sup> <i>J</i> <sub>P<sub>G</sub>,P<sub>X</sub></sub>   | 405.75 | X, X'          | -83.2 |
| <sup>1</sup> <i>J</i> <sub>P<sub>A</sub>,P<sub>X'</sub></sub> | 414.31 | <sup>1</sup> <i>J</i> <sub>P<sub>G'</sub>,P<sub>X'</sub></sub> | 406.26 |                |       |
| <sup>2</sup> <i>J</i> <sub>P<sub>A</sub>,P<sub>G</sub></sub>  | 13.19  | <sup>2</sup> <i>J</i> <sub>P<sub>G'</sub>,P<sub>X</sub></sub>  | -40.72 | G, G'          | 39.6  |
| <sup>2</sup> <i>J</i> <sub>P<sub>A</sub>,P<sub>G'</sub></sub> | 12.39  | <sup>2</sup> <i>J</i> <sub>P<sub>G</sub>,P<sub>X'</sub></sub>  | -41.16 |                |       |
| <sup>1</sup> <i>J</i> <sub>P<sub>G</sub>,P<sub>G'</sub></sub> | 386.38 | <sup>2</sup> <i>J</i> <sub>P<sub>X</sub>,P<sub>X'</sub></sub>  | 5.07   | A              | 76.2  |

[Cp\*Fe( $\eta^4$ -P<sub>5</sub>Me(CH<sub>2</sub>)<sub>3</sub>CN)] (**2d**)

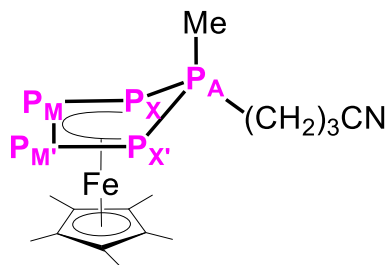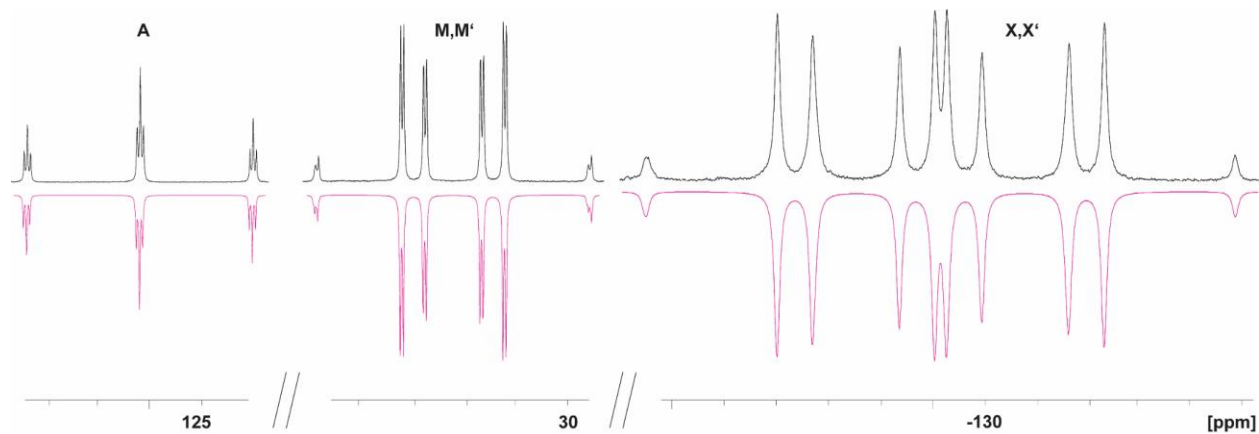

**Fig. S20.** Experimental (top) and simulated (bottom)  $^{31}\text{P}\{^1\text{H}\}$  NMR (161.98 MHz,  $\text{C}_6\text{D}_6$ ) spectrum of **2d**.

**Table S5.** Coupling constants obtained from the simulation (R-factor = 0.85 %) in Figure S20.

| $J$ [Hz]                          |        |                                      |        | $\delta$ [ppm] |        |
|-----------------------------------|--------|--------------------------------------|--------|----------------|--------|
| $^1J_{\text{P}_A, \text{P}_X}$    | 388.43 | $^1J_{\text{P}_M, \text{P}_X}$       | 402.00 | X, X'          | -129.6 |
| $^1J_{\text{P}_A, \text{P}_{X'}}$ | 387.79 | $^1J_{\text{P}_{M'}, \text{P}_{X'}}$ | 396.52 |                |        |
| $^2J_{\text{P}_A, \text{P}_M}$    | 10.38  | $^2J_{\text{P}_{M'}, \text{P}_X}$    | -41.41 | M, M'          | 32.0   |
| $^2J_{\text{P}_A, \text{P}_{M'}}$ | 11.35  | $^2J_{\text{P}_M, \text{P}_{X'}}$    | -35.78 |                |        |
| $^1J_{\text{P}_M, \text{P}_{M'}}$ | 381.21 | $^2J_{\text{P}_X, \text{P}_{X'}}$    | 2.56   | A              | 127.3  |

[Cp\*Fe{(η<sup>4</sup>-P<sub>5</sub>Me(CH<sub>2</sub>)<sub>4</sub>Br)}] (**2e**)

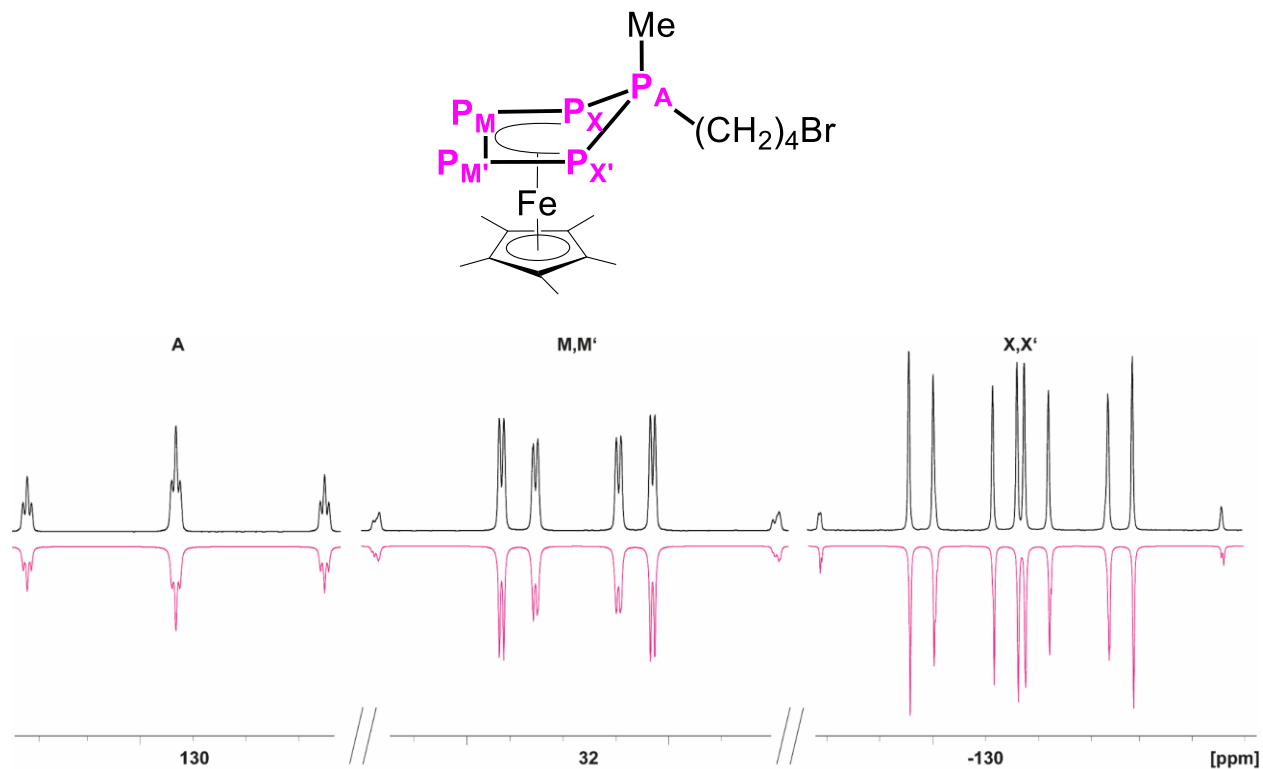

**Fig. S21.** Experimental (top) and simulated (bottom) <sup>31</sup>P{<sup>1</sup>H} NMR (161.98 MHz, C<sub>6</sub>D<sub>6</sub>) spectrum of **2e**.

**Table S6.** Coupling constants obtained from the simulation (R-factor = 3.15 %) in Figure S21.

| <i>J</i> [Hz]                                                 |       | $\delta$ [ppm]                                                 |       |       |            |
|---------------------------------------------------------------|-------|----------------------------------------------------------------|-------|-------|------------|
| <sup>1</sup> <i>J</i> <sub>P<sub>A</sub>,P<sub>X</sub></sub>  | 385.4 | <sup>1</sup> <i>J</i> <sub>P<sub>M</sub>,P<sub>X</sub></sub>   | 402.6 | X, X' | -130.8     |
| <sup>1</sup> <i>J</i> <sub>P<sub>A</sub>,P<sub>X'</sub></sub> | 385.7 | <sup>1</sup> <i>J</i> <sub>P<sub>M'</sub>,P<sub>X'</sub></sub> | 395.4 |       |            |
| <sup>2</sup> <i>J</i> <sub>P<sub>A</sub>,P<sub>M</sub></sub>  | -10.4 | <sup>2</sup> <i>J</i> <sub>P<sub>M'</sub>,P<sub>X</sub></sub>  | -41.0 | M, M' | 31.9, 32.0 |
| <sup>2</sup> <i>J</i> <sub>P<sub>A</sub>,P<sub>M'</sub></sub> | -11.1 | <sup>2</sup> <i>J</i> <sub>P<sub>M</sub>,P<sub>X'</sub></sub>  | -34.0 |       |            |
| <sup>1</sup> <i>J</i> <sub>P<sub>M</sub>,P<sub>M'</sub></sub> | 380.3 | <sup>2</sup> <i>J</i> <sub>P<sub>X</sub>,P<sub>X'</sub></sub>  | -2.8  | A     | 130.8      |

[(Cp\*Fe)<sub>2</sub>{μ,η<sup>4:4</sup>-P<sub>5</sub>tBu(CH<sub>2</sub>)<sub>3</sub>P<sub>5</sub>tBu}] (**3a/3a'**)

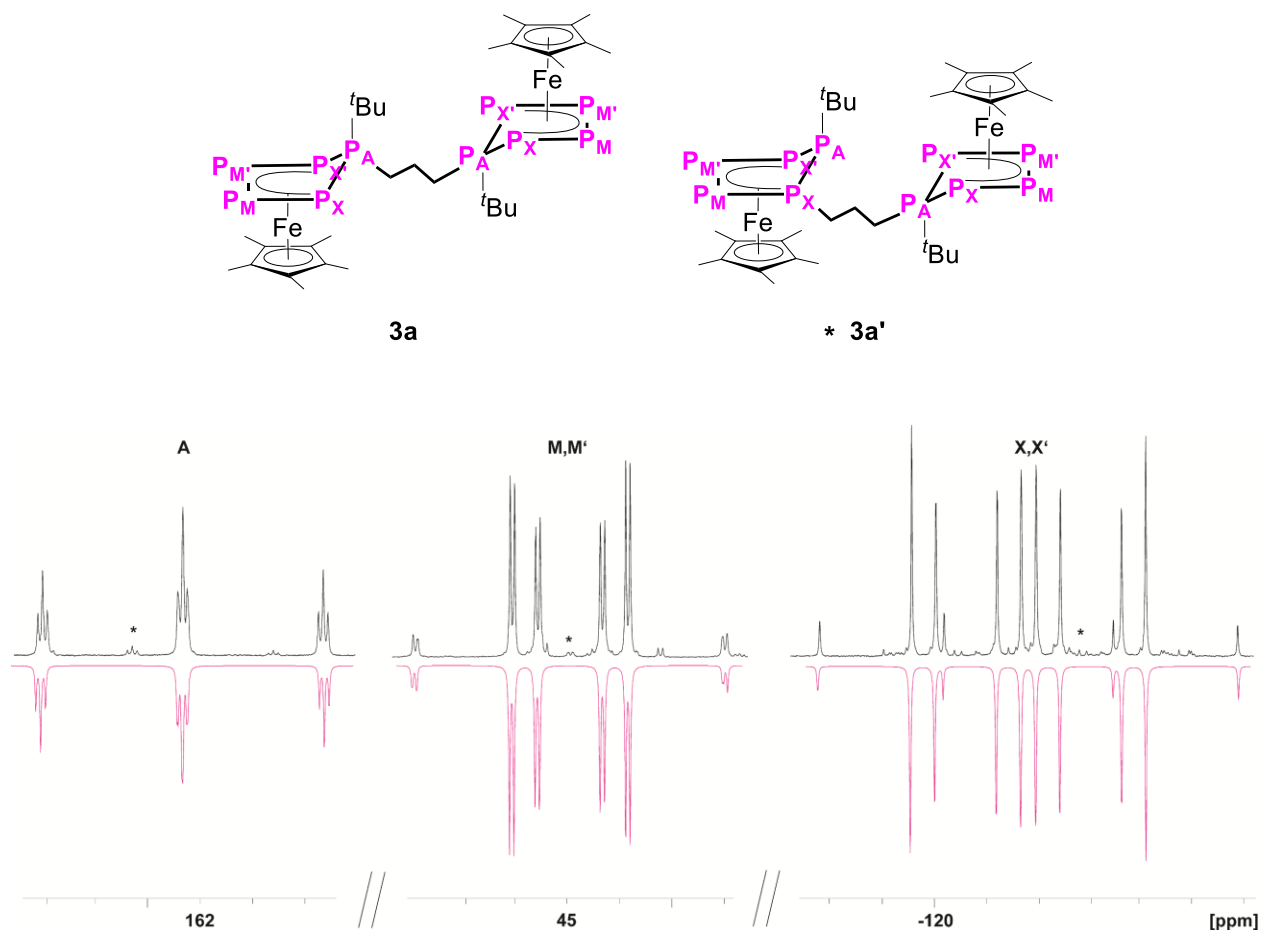

**Fig. S22.** Experimental (top) and simulated (bottom) <sup>31</sup>P{<sup>1</sup>H} NMR (161.98 MHz, CD<sub>2</sub>Cl<sub>2</sub>) spectrum of **3a** (\* = **3a'**).

**Table S7.** Chemical shifts and coupling constants obtained from the simulation (R-factor = 1.05 %) in Figure S22.

| <i>J</i> [Hz]                                                 |        | <i>δ</i> [ppm]                                                 |        |       |         |
|---------------------------------------------------------------|--------|----------------------------------------------------------------|--------|-------|---------|
| <sup>1</sup> <i>J</i> <sub>P<sub>A</sub>,P<sub>X</sub></sub>  | 403.07 | <sup>1</sup> <i>J</i> <sub>P<sub>M</sub>,P<sub>X</sub></sub>   | 404.00 | X, X' | -120.14 |
| <sup>1</sup> <i>J</i> <sub>P<sub>A</sub>,P<sub>X'</sub></sub> | 403.07 | <sup>1</sup> <i>J</i> <sub>P<sub>M'</sub>,P<sub>X'</sub></sub> | 404.00 |       |         |
| <sup>2</sup> <i>J</i> <sub>P<sub>A</sub>,P<sub>M</sub></sub>  | 14.41  | <sup>2</sup> <i>J</i> <sub>P<sub>M'</sub>,P<sub>X</sub></sub>  | -37.51 | M, M' | 44.64   |
| <sup>2</sup> <i>J</i> <sub>P<sub>A</sub>,P<sub>M'</sub></sub> | 14.41  | <sup>2</sup> <i>J</i> <sub>P<sub>M</sub>,P<sub>X'</sub></sub>  | -37.51 |       |         |
| <sup>1</sup> <i>J</i> <sub>P<sub>M</sub>,P<sub>M'</sub></sub> | 385.06 | <sup>2</sup> <i>J</i> <sub>P<sub>X</sub>,P<sub>X'</sub></sub>  | 2.00   | A     | 162.43  |

Three Signals of **3a'** overlay with the Signals of **3a**. Due to the low intensity of **3a'** and the overlay, a simulation was not possible.

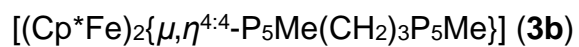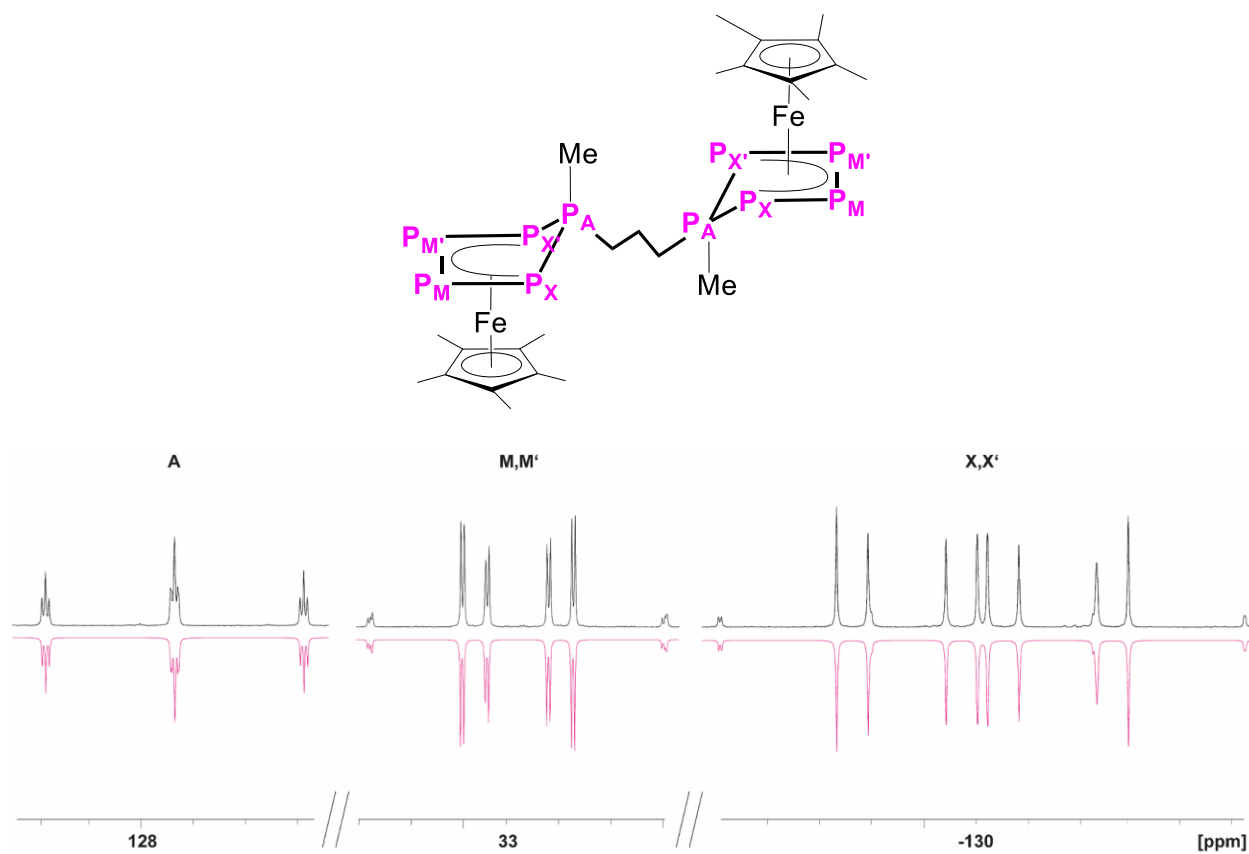

**Fig. S23.** Experimental (top) and simulated (bottom)  $^{31}\text{P}\{^1\text{H}\}$  NMR (161.98 MHz,  $\text{C}_6\text{D}_6$ ) spectrum of **3b**.

**Table S8.** Coupling constants obtained from the simulation (R-factor = 0.43 %) in Figure S23.

| $J$ [Hz]                         |        |                                     |        | $\delta$ [ppm] |        |
|----------------------------------|--------|-------------------------------------|--------|----------------|--------|
| $^1J_{\text{P}_A,\text{P}_X}$    | 386.34 | $^1J_{\text{P}_M,\text{P}_X}$       | 401.41 | X, X'          | -129.6 |
| $^1J_{\text{P}_A,\text{P}_{X'}}$ | 387.07 | $^1J_{\text{P}_{M'},\text{P}_{X'}}$ | 396.75 |                |        |
| $^2J_{\text{P}_A,\text{P}_M}$    | 10.32  | $^2J_{\text{P}_{M'},\text{P}_X}$    | -40.64 | M, M'          | 32.6   |
| $^2J_{\text{P}_A,\text{P}_{M'}}$ | 11.16  | $^2J_{\text{P}_M,\text{P}_{X'}}$    | -36.00 |                |        |
| $^1J_{\text{P}_M,\text{P}_{M'}}$ | 379.19 | $^2J_{\text{P}_X,\text{P}_{X'}}$    | 3.21   | A              | 127.4  |



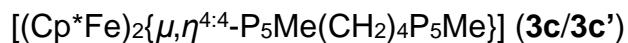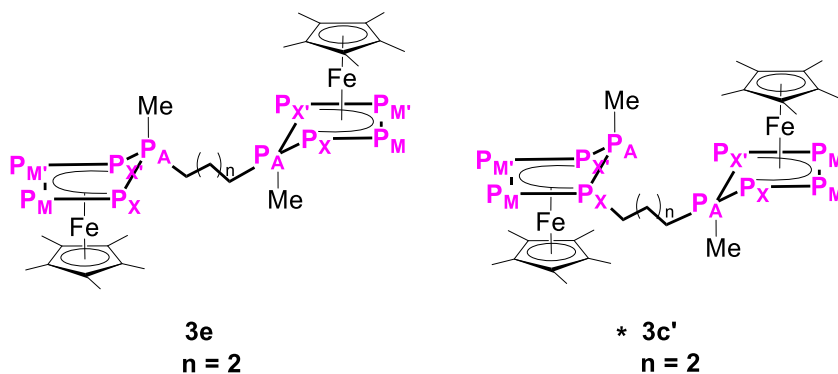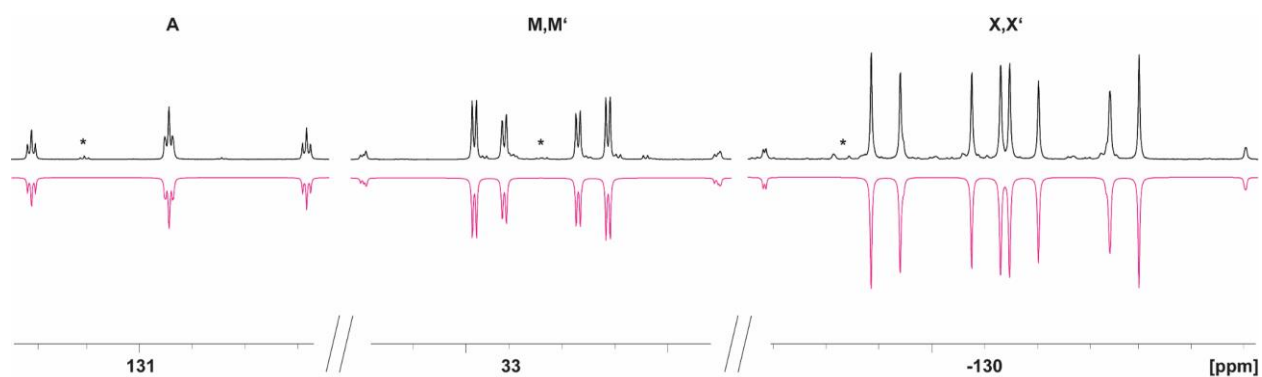

**Fig. S24.** Experimental (top) and simulated (bottom)  $^{31}\text{P}\{^1\text{H}\}$  NMR (161.98 MHz,  $\text{C}_6\text{D}_6$ ) spectrum of **3c** (\* = **3c'**).

**Table S9.** Coupling constants obtained from the simulation (R-factor = 1.06 %) in Figure S24.

| $J$ [Hz]                          |        |                                      |        | $\delta$ [ppm] |        |
|-----------------------------------|--------|--------------------------------------|--------|----------------|--------|
| $^1J_{\text{P}_A, \text{P}_X}$    | 386.37 | $^1J_{\text{P}_M, \text{P}_X}$       | 400.10 | X, X'          | -130.1 |
| $^1J_{\text{P}_A, \text{P}_{X'}}$ | 386.60 | $^1J_{\text{P}_{M'}, \text{P}_{X'}}$ | 398.96 |                |        |
| $^2J_{\text{P}_A, \text{P}_M}$    | 11.02  | $^2J_{\text{P}_{M'}, \text{P}_X}$    | -37.19 | M, M'          | 32.9   |
| $^2J_{\text{P}_A, \text{P}_{M'}}$ | 11.27  | $^2J_{\text{P}_M, \text{P}_{X'}}$    | -38.77 |                |        |
| $^1J_{\text{P}_M, \text{P}_{M'}}$ | 378.84 | $^2J_{\text{P}_X, \text{P}_{X'}}$    | 3.49   | A              | 130.8  |

Three signals of **3c'** overlay with the signals of **3c**. Due to the low intensity of **3c'** and the overlay, a simulation was not possible.

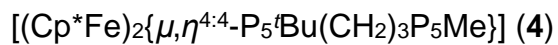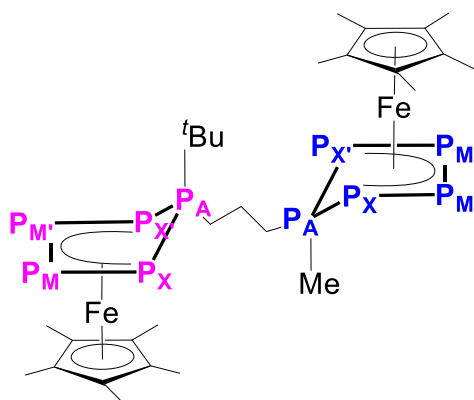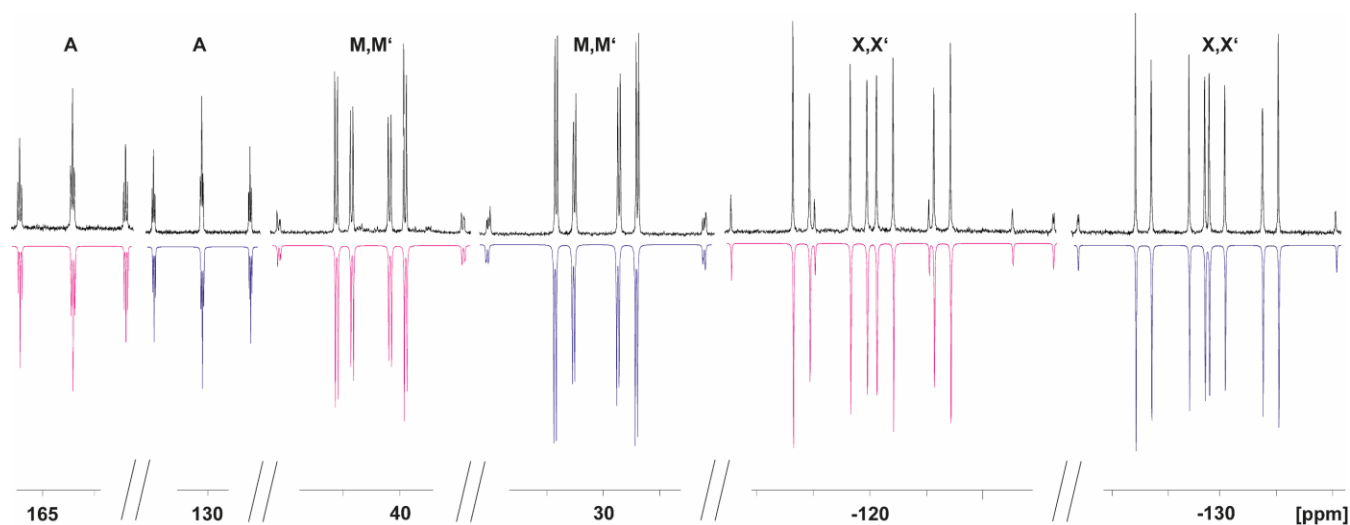

**Fig. S25.** Experimental (top) and simulated (bottom)  $^{31}\text{P}\{^1\text{H}\}$  NMR (161.98 MHz,  $\text{CD}_2\text{Cl}_2$ ) spectrum of **4**.

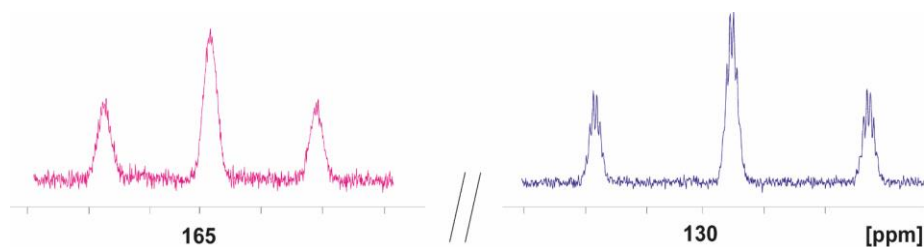

**Fig. S26.** View frame of the essential part of the experimental  $^{31}\text{P}$  NMR (161.98 MHz,  $\text{CD}_2\text{Cl}_2$ ) spectrum of **4**.

**$\text{P}_5\text{tBu-R}$ :**

**Table S10.** Chemical shifts and coupling constants obtained from the simulation (R-factor = 3.79 %) in Figure S25.

| $J$ [Hz]                         |        | $\delta$ [ppm]                   |        |
|----------------------------------|--------|----------------------------------|--------|
| $^1J_{\text{P}_A,\text{P}_X}$    | 411.79 | $^1J_{\text{P}_M,\text{P}_X}$    | 402.75 |
| $^1J_{\text{P}_A,\text{P}_{X'}}$ | 411.53 | $^1J_{\text{P}_M,\text{P}_{X'}}$ | 404.17 |
|                                  |        | X, X'                            | -120.3 |

|                      |        |                      |        |       |       |
|----------------------|--------|----------------------|--------|-------|-------|
| ${}^2J_{P_A,P_M}$    | 14.41  | ${}^2J_{P_{M'},P_X}$ | -38.32 | M, M' | 41.0  |
| ${}^2J_{P_A,P_{M'}}$ | 14.28  | ${}^2J_{P_M,P_{X'}}$ | -39.65 |       |       |
| ${}^1J_{P_M,P_{M'}}$ | 386.85 | ${}^2J_{P_X,P_{X'}}$ | -0.52  | A     | 164.3 |

### P<sub>5</sub>Me-R:

**Table S11.** Coupling constants obtained from the simulation (R-factor = 3.79 %) in Figure S24.

| $J$ [Hz]             |        |                         |        | $\delta$ [ppm] |        |
|----------------------|--------|-------------------------|--------|----------------|--------|
| ${}^1J_{P_A,P_X}$    | 384.39 | ${}^1J_{P_M,P_X}$       | 396.00 | X, X'          | -129.9 |
| ${}^1J_{P_A,P_{X'}}$ | 383.85 | ${}^1J_{P_{M'},P_{X'}}$ | 400.37 |                |        |
| ${}^2J_{P_A,P_M}$    | 10.69  | ${}^2J_{P_{M'},P_X}$    | -35.00 | M, M'          | 29.8   |
| ${}^2J_{P_A,P_{M'}}$ | 10.95  | ${}^2J_{P_M,P_{X'}}$    | -39.00 |                |        |
| ${}^1J_{P_M,P_{M'}}$ | 385.85 | ${}^2J_{P_X,P_{X'}}$    | 3.03   | A              | 128.9  |

[Cp\*Fe{η<sup>4</sup>-P<sup>t</sup>Bu(CH<sub>2</sub>)<sub>3</sub>PPh<sub>2</sub>}] (**5**)

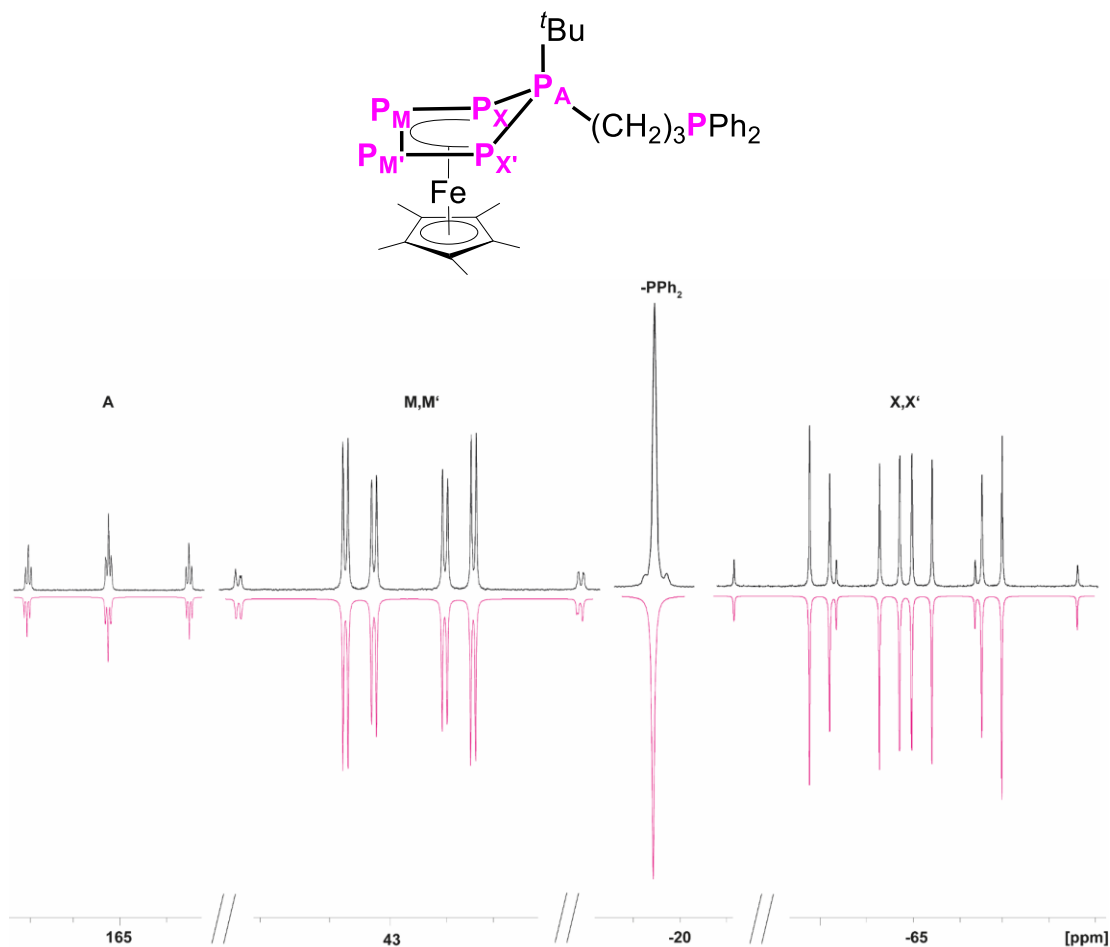

**Fig. S27.** Experimental (top) and simulated (bottom) <sup>31</sup>P{<sup>1</sup>H} NMR (161.98 MHz, C<sub>6</sub>D<sub>6</sub>) spectrum of **5**.

**Table S12.** Coupling constants obtained from the simulation (R-factor = 8.07 %) in Figure S27.

| J [Hz]                                                 |        |                                                         |        | δ [ppm]          |         |
|--------------------------------------------------------|--------|---------------------------------------------------------|--------|------------------|---------|
| <sup>1</sup> J <sub>P<sub>A</sub>,P<sub>X</sub></sub>  | 412.20 | <sup>1</sup> J <sub>P<sub>M</sub>,P<sub>X</sub></sub>   | 400.99 | X, X'            | -121.65 |
| <sup>1</sup> J <sub>P<sub>A</sub>,P<sub>X'</sub></sub> | 412.09 | <sup>1</sup> J <sub>P<sub>M'</sub>,P<sub>X'</sub></sub> | 403.85 |                  |         |
| <sup>2</sup> J <sub>P<sub>A</sub>,P<sub>M</sub></sub>  | 14.25  | <sup>2</sup> J <sub>P<sub>M'</sub>,P<sub>X</sub></sub>  | -37.84 | M, M'            | 42.57   |
| <sup>2</sup> J <sub>P<sub>A</sub>,P<sub>M'</sub></sub> | 14.26  | <sup>2</sup> J <sub>P<sub>M</sub>,P<sub>X'</sub></sub>  | -40.90 |                  |         |
| <sup>1</sup> J <sub>P<sub>M</sub>,P<sub>M'</sub></sub> | 383.98 | <sup>2</sup> J <sub>P<sub>X</sub>,P<sub>X'</sub></sub>  | -0.344 | A                | 164.88  |
|                                                        |        |                                                         |        | PPh <sub>2</sub> | -17.87  |

$t\text{BuPBn}((\text{CH}_2)_3\text{Bn})$  (**6**)

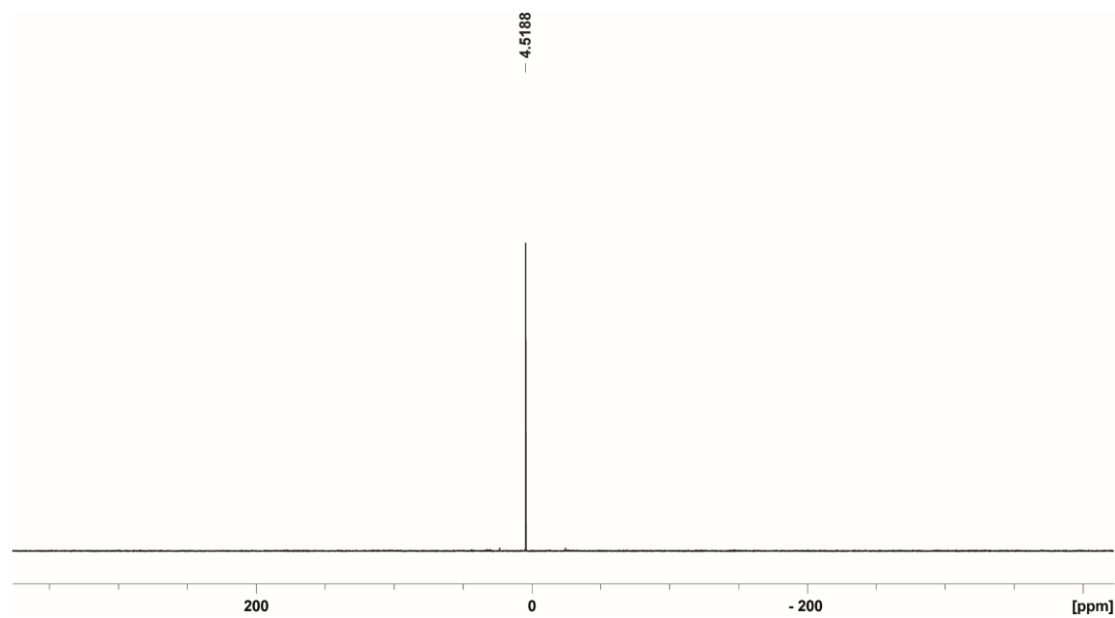

**Fig. S28.** Experimental  $^{31}\text{P}\{^1\text{H}\}$  NMR (161.98 MHz,  $\text{C}_6\text{D}_6$ ) spectrum of **6**.

$\text{SP}^t\text{BuBn}((\text{CH}_2)_3\text{Bn})$  (**6'**)

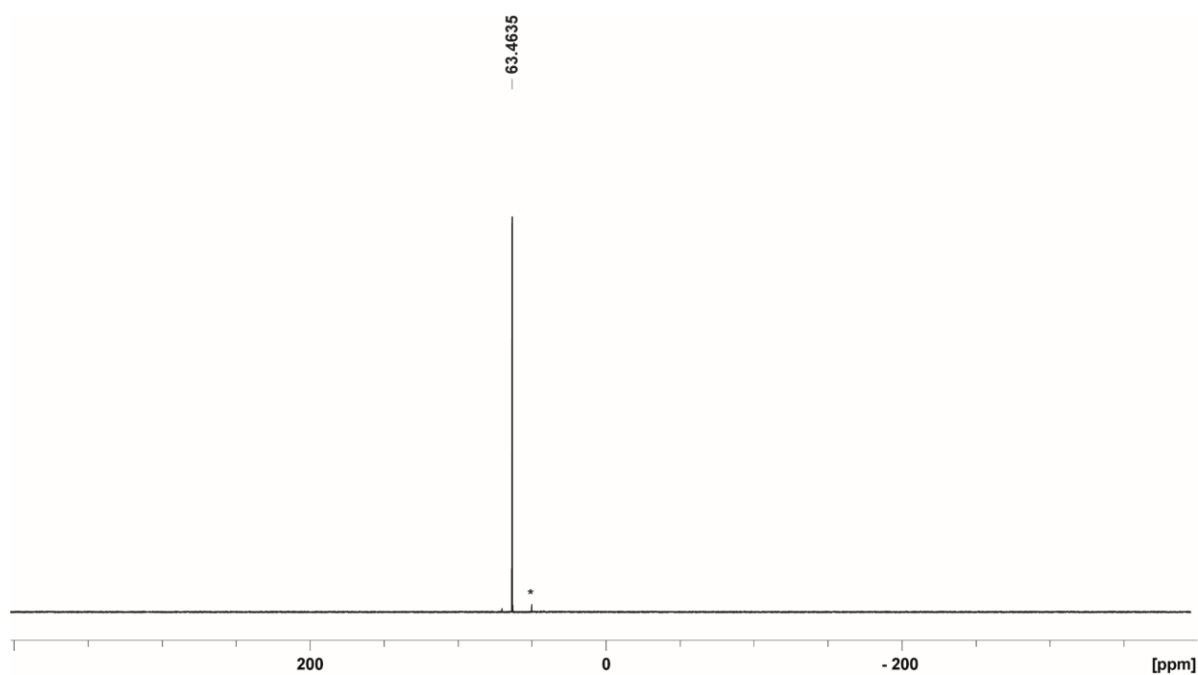

**Fig. S29.** Experimental  $^{31}\text{P}\{^1\text{H}\}$  NMR (161.98 MHz,  $\text{C}_6\text{D}_6$ ) spectrum of **6'** (\* =  $\text{OP}^t\text{BuBn}((\text{CH}_2)_3\text{Bn})$ ).

[Cp\*Fe{η<sup>4</sup>-P<sub>5</sub>((CH<sub>2</sub>)<sub>3</sub>CN)<sub>2</sub>}] (**7**)

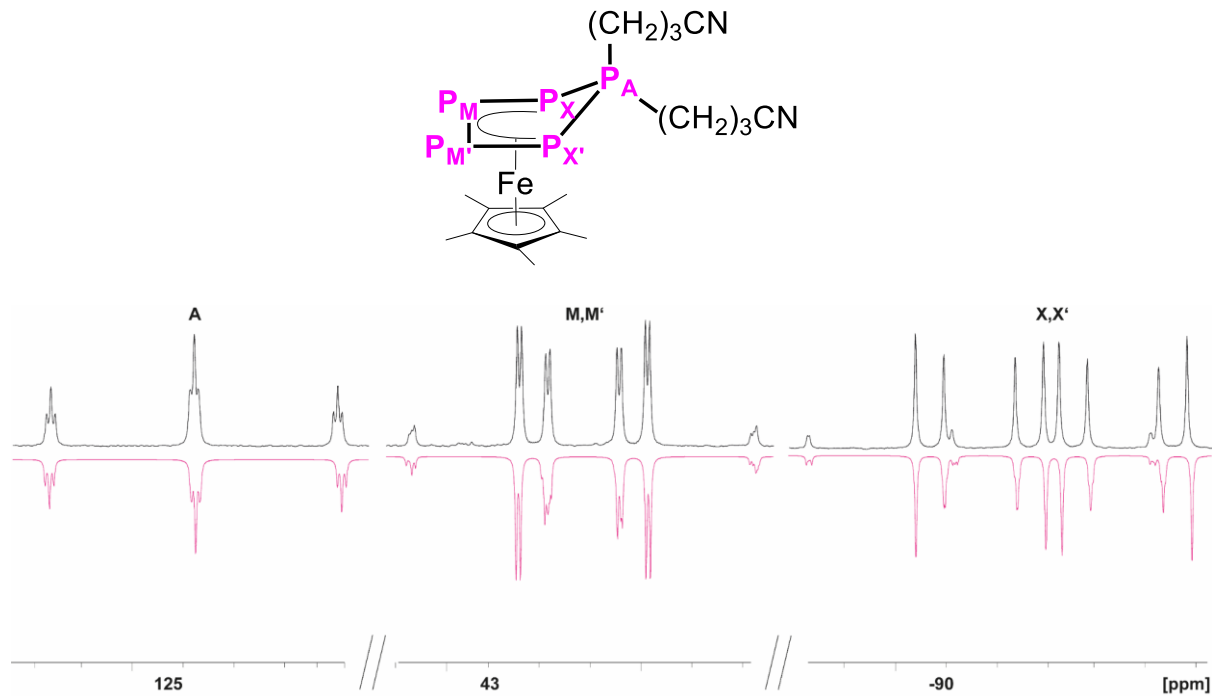

**Fig. S30.** Experimental (top) and simulated (bottom) <sup>31</sup>P{<sup>1</sup>H} NMR (161.98 MHz, C<sub>6</sub>D<sub>6</sub>) spectrum of **7**.

**Table S13.** Coupling constants obtained from the simulation (R-factor = 2.41 %) in Figure S30.

| J [Hz]                                                 |        |                                                         |        | δ [ppm] |        |
|--------------------------------------------------------|--------|---------------------------------------------------------|--------|---------|--------|
| <sup>1</sup> J <sub>P<sub>A</sub>,P<sub>X</sub></sub>  | 409.62 | <sup>1</sup> J <sub>P<sub>M</sub>,P<sub>X</sub></sub>   | 400.00 | X, X'   | -129.2 |
| <sup>1</sup> J <sub>P<sub>A</sub>,P<sub>X'</sub></sub> | 409.76 | <sup>1</sup> J <sub>P<sub>M'</sub>,P<sub>X'</sub></sub> | 407.00 |         |        |
| <sup>2</sup> J <sub>P<sub>A</sub>,P<sub>M</sub></sub>  | 11.37  | <sup>2</sup> J <sub>P<sub>M'</sub>,P<sub>X</sub></sub>  | -35.28 | M, M'   | 37.0   |
| <sup>2</sup> J <sub>P<sub>A</sub>,P<sub>M'</sub></sub> | 11.51  | <sup>2</sup> J <sub>P<sub>M</sub>,P<sub>X'</sub></sub>  | -42.64 |         |        |
| <sup>1</sup> J <sub>P<sub>M</sub>,P<sub>M'</sub></sub> | 379.00 | <sup>2</sup> J <sub>P<sub>X</sub>,P<sub>X'</sub></sub>  | 1.50   | A       | 133.7  |

[Cp\*Fe{η<sup>4</sup>-P<sub>5</sub>((CH<sub>2</sub>)<sub>3</sub>CN)<sub>2</sub>}ZnBr<sub>2</sub>] (**8**)

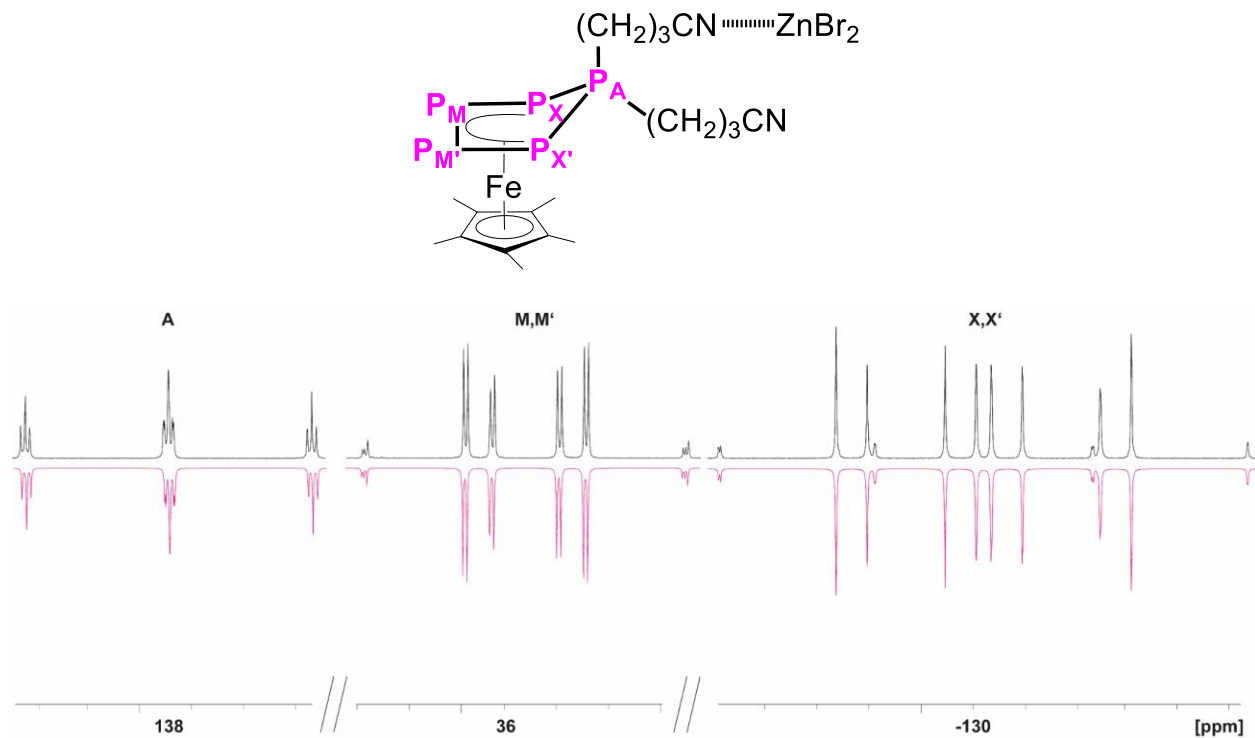

**Fig. S31.** Experimental (top) and simulated (bottom) <sup>31</sup>P{<sup>1</sup>H} NMR (161.98 MHz, THF-d<sub>8</sub>) spectrum of **8**.

**Table S14.** Coupling constants obtained from the simulation (R-factor = 0.39 %) in Figure S31.

| <i>J</i> [Hz]                                                 |        |                                                                |        | $\delta$ [ppm] |        |
|---------------------------------------------------------------|--------|----------------------------------------------------------------|--------|----------------|--------|
| <sup>1</sup> <i>J</i> <sub>P<sub>A</sub>,P<sub>X</sub></sub>  | 398.68 | <sup>1</sup> <i>J</i> <sub>P<sub>M</sub>,P<sub>X</sub></sub>   | 397.74 | X, X'          | -130.3 |
| <sup>1</sup> <i>J</i> <sub>P<sub>A</sub>,P<sub>X'</sub></sub> | 398.62 | <sup>1</sup> <i>J</i> <sub>P<sub>M'</sub>,P<sub>X'</sub></sub> | 400.27 |                |        |
| <sup>2</sup> <i>J</i> <sub>P<sub>A</sub>,P<sub>M</sub></sub>  | 12.41  | <sup>2</sup> <i>J</i> <sub>P<sub>M</sub>,P<sub>X</sub></sub>   | -37.83 | M, M'          | 36.3   |
| <sup>2</sup> <i>J</i> <sub>P<sub>A</sub>,P<sub>M'</sub></sub> | 12.63  | <sup>2</sup> <i>J</i> <sub>P<sub>M</sub>,P<sub>X'</sub></sub>  | -40.16 |                |        |
| <sup>1</sup> <i>J</i> <sub>P<sub>M</sub>,P<sub>M'</sub></sub> | 378.88 | <sup>2</sup> <i>J</i> <sub>P<sub>X</sub>,P<sub>X'</sub></sub>  | 2.26   | A              | 137.9  |

**$^{13}\text{C}$  NMR spectra:**

**$t\text{BuPBn}((\text{CH}_2)_3\text{Bn})$  (**6**)**

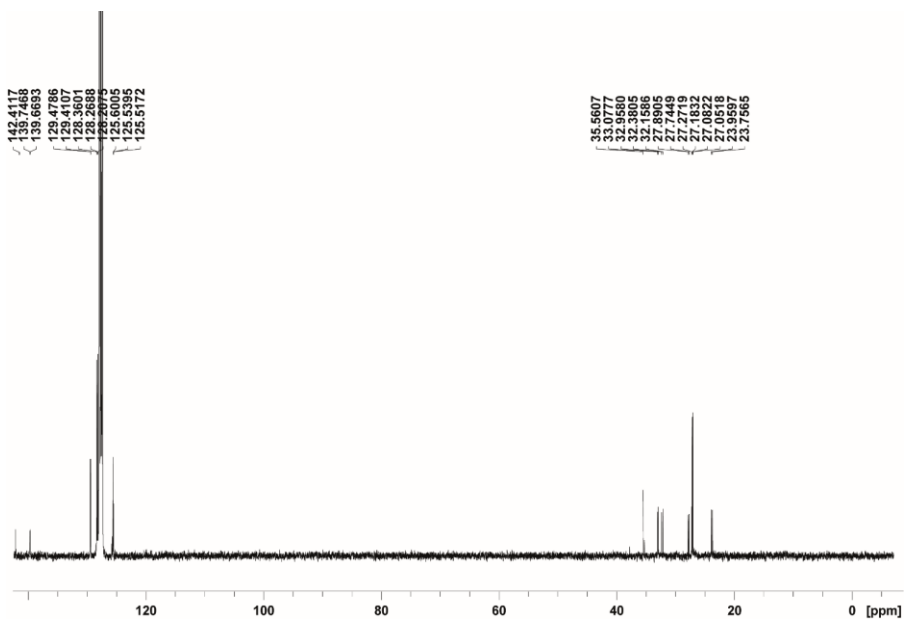

**Fig. S32.** Experimental  $^{13}\text{C}\{^1\text{H}\}$  NMR (100.61 MHz,  $\text{C}_6\text{D}_6$ ) spectrum of **6**.

**$\text{SP}^t\text{BuBn}((\text{CH}_2)_3\text{Bn})$  (**6'**)**

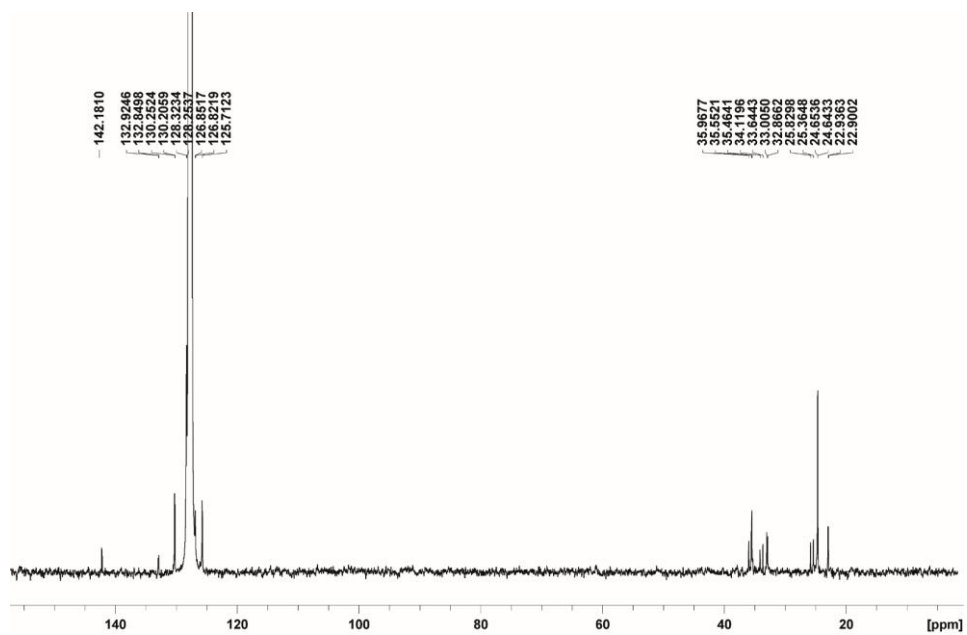

**Fig. S33.** Experimental  $^{13}\text{C}\{^1\text{H}\}$  NMR (100.61 MHz,  $\text{C}_6\text{D}_6$ ) spectrum of **6'**.



### Crystallographic details

**[K(18c6)(thf)][Cp\*Fe( $\eta^4$ -P<sub>5</sub>-C≡CPh)] (1c):** There are two molecules of **1c**, two by 18-c-6 coordinated K cations and two THF solvent molecules in the asymmetric unit. One of these THF molecule is disordered over two positions (50:50). Further are both P<sub>5</sub> ligands disordered over two positions (94:6; 92:8). The restraints SADI and SIMU were applied to model these disorders. The structure in solid state is given in **Figure S34 and S35**. Crystallographic and refinement data are summarized in **Table S15**.

**[Cp\*Fe( $\eta^4$ -P<sub>5</sub><sup>t</sup>Bu(CH<sub>2</sub>)<sub>3</sub>Br)] (2a):** The asymmetric unit contains one molecule of **2a** without any disorder. The structure in solid state is given in **Figure S36**. Crystallographic and refinement data are summarized in **Table S15**.

**[Cp\*Fe( $\eta^4$ -P<sub>5</sub>Me(CH<sub>2</sub>)<sub>3</sub>Br)] (2b):** The asymmetric unit contains one molecule of **2b**. Compound **3b** co crystallizes with another compound in the ratio (90:10). The second compound features a P<sub>5</sub>Me(CH<sub>2</sub>)<sub>3</sub>Br ligand were one substituent migrated to a neighboring phosphorus atom. The SADI and SIMU restraints were applied to model this disorder. The structure in solid state is given in **Figure S37**. Crystallographic and refinement data are summarized in **Table S15**.

**[Cp\*Fe( $\eta^4$ -P<sub>5</sub>(-C≡CPh)Me)] (2c):** The asymmetric unit contains one molecule of **2c** without any disorder. The structure in solid state is given in **Figure S38**. Crystallographic and refinement data are summarized in **Table S15**.

**[Cp\*Fe( $\eta^4$ -P<sub>5</sub>Me(CH<sub>2</sub>)<sub>3</sub>CN)] (2d):** The asymmetric unit contains one molecule of **3d**. Furthermore, compound **I** co-crystallizes at the same position and can only be distinguished by the disordered middle deck, with a distribution of 5:95. The structure in solid state is given in **Figure S39 and S40**. Crystallographic and refinement data are summarized in **Table S15**.

**[Cp\*Fe( $\eta^4$ -P<sub>5</sub>Me(CH<sub>2</sub>)<sub>4</sub>Br)] (2e):** The asymmetric unit contains one molecule of **2e**. Compound **3b** co crystallizes with another compound in the ratio (90:10). The second compound features a P<sub>5</sub>Me(CH<sub>2</sub>)<sub>4</sub>Br ligand were one substituent migrated to a neighboring phosphorus atom. The SADI and SIMU restraints were applied to model this disorder. The structure in solid state is given in **Figure S41**. Crystallographic and refinement data are summarized in **Table S15**.

**[(Cp\*Fe)<sub>2</sub>( $\mu$ , $\eta^{4:4}$ -P<sub>5</sub><sup>t</sup>Bu(CH<sub>2</sub>)<sub>3</sub>P<sub>5</sub><sup>t</sup>Bu)] (3a / 3a')**: The asymmetric unit contains one molecule of **3a** and **3a'** which co-crystallizes and a distribution of 92:8, respectively. The structures in solid state are depicted in **Figure S42, S43 and S44**. The unit cell contains 2 uncoordinated molecules of dichloromethane and 3 molecules of *n*-hexane which were removed with the implemented tool *SQUEEZE* due to unresolvable disorder. Crystallographic and refinement data are summarized in **Table S16**.

**[(Cp\*Fe)<sub>2</sub>( $\mu$ , $\eta^{4:4}$ -P<sub>5</sub>Me(CH<sub>2</sub>)<sub>3</sub>P<sub>5</sub>Me)] (3b):** The asymmetric unit contains one molecule of **3b**. One Cp\* ligand is disordered over two positions with a distribution of 58:42. To

describe the disorders the SIMU restrain is applied. The structure in solid state is given in **Figure S45**. Crystallographic and refinement data are summarized in **Table S16**.

**[(Cp\*Fe)<sub>2</sub>{μ,η<sup>4:4</sup>-P<sub>5</sub>Me(CH<sub>2</sub>)<sub>4</sub>P<sub>5</sub>Me}] (3c)**: The asymmetric unit contains half a molecule of **3c**. The Cp\* ligand is disordered over two positions with a distribution of 60:40. The structure in solid state is given in **Figure S46**. The unit cell contains 1.5 uncoordinated molecules of dichloromethane which were removed with the implemented tool *SQUEEZE* due to unresolvable disorder. Crystallographic and refinement data are summarized in **Table S16**.

**[(Cp\*Fe)<sub>2</sub>{μ,η<sup>4:4</sup>-P<sub>5</sub>tBu(CH<sub>2</sub>)<sub>3</sub>P<sub>5</sub>Me}] (4)**: The asymmetric unit contains one molecule of **4** without any disorder. The structure in solid state is given in **Figure S47**. Crystallographic and refinement data are summarized in **Table S16**.

**[Cp\*Fe(η<sup>4</sup>-P<sub>5</sub>tBu(CH<sub>2</sub>)<sub>3</sub>PPh<sub>2</sub>)] (5)**: The asymmetric unit contains two molecules of **5**. The P<sub>5</sub> middle decks are disordered over two positions in both molecules with a distribution of 65:35 / 76:24, respectively. As well as the middle decks, both Cp\* ligands is disordered over two positions with a distribution of 85:15 in both molecules. In addition to this, the *n*-propyl-di-phenyl-phosphine residue is disorder over two positions. Thereby, the occupancy is 77:23 / 85:15, respectively. To describe the disorders the SADI and SIMU restrains are applied. Since the distribution, bond lengths, and bond angles are very similar, only one molecule in solid state is depicted in **Figure S48** and **S49** and its bond lengths and angles are presented in **Table S38** and **S39**. Crystallographic and refinement data are summarized in **Table S17**.

**SPtBuBn((CH<sub>2</sub>)<sub>4</sub>Ph) (6')**: The asymmetric unit contains one molecule of **6'** without any disorder. The structure in solid state is given in **Figure S50**. Crystallographic and refinement data are summarized in **Table S17**.

**[Cp\*Fe{η<sup>4</sup>-P<sub>5</sub>((CH<sub>2</sub>)<sub>3</sub>CN)<sub>2</sub>}] (7)**: The asymmetric unit contains one molecule of **7**. The P<sub>5</sub> middle decks are disordered over two positions with a distribution of 97:3. Since the carbon atoms of part 2 cannot be resolved, due to the low occupation, only the bond lengths and angles of part 1 are presented in **Table S42** and **S43**. The structure in solid state is given in **Figure S51** and **S52**. Crystallographic and refinement data are summarized in **Table S17**.

**[(Cp\*Fe{η<sup>4</sup>-P<sub>5</sub>((CH<sub>2</sub>)<sub>3</sub>CN)<sub>2</sub>})ZnBr<sub>2</sub>] (8)**: The asymmetric unit contains one molecule of **8** without any disorder, forming a linear polymer when grown. Since the measured crystal was twinned, a HKLF5 refinement was applied (BASF 0.368). The structure in solid state is given in **Figure S53**. Crystallographic and refinement data are summarized in **Table S17**.

CCDC-2247948 (**1c**), CCDC-2041983 (**2a**), CCDC-2247949 (**2b**), CCDC-2247950 (**2c**), CCDC-2041982 (**2d**), CCDC-2247951 (**2e**), CCDC-2041984 (**3a**), CCDC-2247952 (**3b**), CCDC-2247953 (**3c**), CCDC-2041985 (**4**), CCDC-2041986 (**5**), CCDC-2247954 (**6'**), CCDC-2247955 (**7**), and CCDC-2247956 (**8**), contain the supplementary crystallographic data for this paper. These data can be obtained free of charge at [www.ccdc.cam.ac.uk/conts/retrieving.html](http://www.ccdc.cam.ac.uk/conts/retrieving.html) (or from the Cambridge Crystallographic Data Centre, 12 Union Road, Cambridge CB2 1EZ, UK; Fax: + 44-1223-336-033; e-mail: [deposit@ccdc.cam.ac.uk](mailto:deposit@ccdc.cam.ac.uk)).

**Table S15.** Crystallographic details of **1c** and **2a-d**.

| Compound                                      | 1c                                                               | 2a                                                 | 2b                                                    | 2c                                               | 2d                                                                       |
|-----------------------------------------------|------------------------------------------------------------------|----------------------------------------------------|-------------------------------------------------------|--------------------------------------------------|--------------------------------------------------------------------------|
| CCDC                                          | 2247948                                                          | 2041983                                            | 2247949                                               | 2247950                                          | 2041982                                                                  |
| Formula                                       | C <sub>34</sub> H <sub>52</sub> FeKO <sub>7</sub> P <sub>5</sub> | C <sub>17</sub> H <sub>30</sub> BrFeP <sub>5</sub> | C <sub>14</sub> H <sub>24</sub> BrFeP <sub>5</sub>    | C <sub>19</sub> H <sub>23</sub> FeP <sub>5</sub> | C <sub>14.75</sub> H <sub>23.55</sub> FeN <sub>0.95</sub> P <sub>5</sub> |
| <i>D</i> <sub>calc.</sub> /g cm <sup>-3</sup> | 1.364                                                            | 1.558                                              | 1.595                                                 | 1.455                                            | 1.425                                                                    |
| $\mu$ /mm <sup>-1</sup>                       | 6.192                                                            | 2.816                                              | 12.027                                                | 9.316                                            | 1.160                                                                    |
| Formula Weight                                | 1645.11                                                          | 525.02                                             | 482.94                                                | 462.07                                           | 424.89                                                                   |
| Colour                                        | Metallic dark green                                              | dark brown                                         | dark red                                              | green                                            | clear dark brown                                                         |
| Shape                                         | Block                                                            | needle                                             | plate                                                 | plate-shaped                                     | block                                                                    |
| Size/mm <sup>3</sup>                          | 0.37x0.15x0.11                                                   | 0.27x0.10x0.07                                     | 0.21x0.12x0.03                                        | 0.39x0.21x0.06                                   | 0.33x0.20x0.17                                                           |
| <i>T</i> /K                                   | 123.00                                                           | 123(1)                                             | 122.9(2)                                              | 123.00(10)                                       | 123                                                                      |
| Crystal System                                | monoclinic                                                       | monoclinic                                         | orthorhombic                                          | monoclinic                                       | monoclinic                                                               |
| Flack Parameter                               | /                                                                | /                                                  | -0.008(7)                                             | /                                                | /                                                                        |
| Hooft Parameter                               | /                                                                | /                                                  | -0.003(5)                                             | /                                                | /                                                                        |
| Space Group                                   | <i>P</i> 2 <sub>1</sub> / <i>c</i>                               | <i>P</i> 2 <sub>1</sub> / <i>m</i>                 | <i>P</i> 2 <sub>1</sub> 2 <sub>1</sub> 2 <sub>1</sub> | <i>P</i> 2 <sub>1</sub> / <i>n</i>               | <i>P</i> 2 <sub>1</sub> / <i>c</i>                                       |
| <i>a</i> /Å                                   | 20.3442(5)                                                       | 11.2089(5)                                         | 8.1330(2)                                             | 9.53044(5)                                       | 14.2369(3)                                                               |
| <i>b</i> /Å                                   | 26.2921(5)                                                       | 11.4407(4)                                         | 9.6956(2)                                             | 14.14435(7)                                      | 9.0210(2)                                                                |
| <i>c</i> /Å                                   | 15.0828(3)                                                       | 18.1308(8)                                         | 25.5069(6)                                            | 16.21683(8)                                      | 16.3159(5)                                                               |
| <i>a</i> <sup>o</sup>                         | 90                                                               | 90                                                 | 90                                                    | 90                                               | 90                                                                       |
| <i>b</i> <sup>o</sup>                         | 96.721(2)                                                        | 105.764(4)                                         | 90                                                    | 105.2398(5)                                      | 109.044(3)                                                               |
| <i>g</i> <sup>o</sup>                         | 90                                                               | 90                                                 | 90                                                    | 90                                               | 90                                                                       |
| <i>V</i> /Å <sup>3</sup>                      | 8012.2(3)                                                        | 2237.60(17)                                        | 2011.33(8)                                            | 2109.183(19)                                     | 1980.78(9)                                                               |
| <i>Z</i>                                      | 4                                                                | 4                                                  | 4                                                     | 4                                                | 4                                                                        |
| <i>Z</i> '                                    | 2                                                                | 1                                                  | 1                                                     | 1                                                | 1                                                                        |
| Wavelength/Å                                  | 1.54184                                                          | 0.71073                                            | 1.54184                                               | 1.54184                                          | 0.71073                                                                  |
| Radiation type                                | CuK $\alpha$                                                     | MoK $\alpha$                                       | CuK $\alpha$                                          | CuK $\alpha$                                     | MoK $\alpha$                                                             |
| <i>Q</i> <sub>min</sub> <sup>o</sup>          | 3.362                                                            | 3.499                                              | 3.466                                                 | 4.213                                            | 3.231                                                                    |
| <i>Q</i> <sub>max</sub> <sup>o</sup>          | 66.600                                                           | 32.281                                             | 74.916                                                | 74.357                                           | 32.255                                                                   |
| Measured Refl's.                              | 41460                                                            | 13109                                              | 6543                                                  | 51123                                            | 19036                                                                    |
| Ind't Refl's                                  | 14019                                                            | 7434                                               | 3431                                                  | 4256                                             | 6439                                                                     |
| Refl's with <i>I</i> > 2( <i>I</i> )          | 10664                                                            | 6052                                               | 3190                                                  | 4200                                             | 5702                                                                     |
| <i>R</i> <sub>int</sub>                       | 0.0652                                                           | 0.0222                                             | 0.0322                                                | 0.0337                                           | 0.0189                                                                   |
| Parameters                                    | 1010                                                             | 255                                                | 259                                                   | 232                                              | 214                                                                      |
| Restraints                                    | 279                                                              | 0                                                  | 69                                                    | 0                                                | 0                                                                        |
| Largest Peak                                  | 0.659                                                            | 1.046                                              | 0.888                                                 | 0.858                                            | 1.173                                                                    |
| Deepest Hole                                  | -0.535                                                           | -0.440                                             | -1.150                                                | -0.435                                           | -0.490                                                                   |
| GooF                                          | 1.085                                                            | 1.064                                              | 1.071                                                 | 1.074                                            | 1.051                                                                    |
| <i>wR</i> <sub>2</sub> (all data)             | 0.1963                                                           | 0.0807                                             | 0.1398                                                | 0.0801                                           | 0.0883                                                                   |
| <i>wR</i> <sub>2</sub>                        | 0.1829                                                           | 0.0752                                             | 0.1361                                                | 0.0799                                           | 0.0851                                                                   |
| <i>R</i> <sub>1</sub> (all data)              | 0.0981                                                           | 0.0483                                             | 0.0551                                                | 0.0289                                           | 0.0385                                                                   |
| <i>R</i> <sub>1</sub>                         | 0.0754                                                           | 0.0349                                             | 0.0510                                                | 0.0287                                           | 0.0328                                                                   |

**Table S16.** Crystallographic details of **2e**, **3a-c** and **4**.

| Compound                                      | 2e                                                 | 3a                                                                  | 3b                                                              | 3c                                                                                | 4                                                               |
|-----------------------------------------------|----------------------------------------------------|---------------------------------------------------------------------|-----------------------------------------------------------------|-----------------------------------------------------------------------------------|-----------------------------------------------------------------|
| CCDC                                          | 2247951                                            | 2041984                                                             | 2247952                                                         | 2247953                                                                           | 2041985                                                         |
| Formula                                       | C <sub>18</sub> H <sub>32</sub> BrFeP <sub>5</sub> | C <sub>40.5</sub> ClFe <sub>2</sub> H <sub>76</sub> P <sub>10</sub> | C <sub>25</sub> H <sub>42</sub> Fe <sub>2</sub> P <sub>10</sub> | C <sub>27.5</sub> Cl <sub>3</sub> Fe <sub>2</sub> H <sub>47</sub> P <sub>10</sub> | C <sub>28</sub> H <sub>48</sub> Fe <sub>2</sub> P <sub>10</sub> |
| <i>D</i> <sub>calc</sub> / g cm <sup>-3</sup> | 1.493                                              | 1.432                                                               | 1.470                                                           | 1.460                                                                             | 1.443                                                           |
| $\mu$ /mm <sup>-1</sup>                       | 10.146                                             | 1.037                                                               | 11.252                                                          | 11.265                                                                            | 10.494                                                          |
| Formula Weight                                | 539.04                                             | 1019.86                                                             | 763.98                                                          | 905.40                                                                            | 806.06                                                          |
| Colour                                        | black                                              | dark green                                                          | brownish green                                                  | green                                                                             | dark green                                                      |
| Shape                                         | sticks                                             | block                                                               | plate-shaped                                                    | plate-shaped                                                                      | needle                                                          |
| Size/mm <sup>3</sup>                          | 0.89x0.125x0.096                                   | 0.57x0.32x0.29                                                      | 0.33x0.05x0.03                                                  | 0.23x0.11x0.03                                                                    | 0.50x0.12x0.09                                                  |
| <i>T</i> /K                                   | 122.9(2)                                           | 123(1)                                                              | 123.01(10)                                                      | 123.00(10)                                                                        | 123(1)                                                          |
| Crystal System                                | monoclinic                                         | monoclinic                                                          | monoclinic                                                      | monoclinic                                                                        | triclinic                                                       |
| Flack Parameter                               |                                                    | /                                                                   | /                                                               | /                                                                                 | /                                                               |
| Hooft Parameter                               |                                                    | /                                                                   | /                                                               | /                                                                                 | /                                                               |
| Space Group                                   | <i>P</i> <sub>2</sub> <sub>1</sub> / <i>n</i>      | <i>P</i> <sub>2</sub> <sub>1</sub> / <i>c</i>                       | <i>P</i> <sub>2</sub> <sub>1</sub> / <i>c</i>                   | <i>P</i> <sub>2</sub> <sub>1</sub> / <i>n</i>                                     | <i>P</i> -1                                                     |
| <i>a</i> /Å                                   | 14.6139(4)                                         | 15.5101(3)                                                          | 14.3913(2)                                                      | 8.6991(2)                                                                         | 8.8375(4)                                                       |
| <i>b</i> /Å                                   | 8.2362(3)                                          | 12.8109(2)                                                          | 8.09300(10)                                                     | 9.0109(2)                                                                         | 14.5973(7)                                                      |
| <i>c</i> /Å                                   | 20.3049(5)                                         | 24.2981(3)                                                          | 30.4026(3)                                                      | 26.6182(8)                                                                        | 16.2499(8)                                                      |
| <i>a</i> <sup>o</sup>                         | 90                                                 | 90                                                                  | 90                                                              | 90                                                                                | 63.684(5)                                                       |
| <i>b</i> <sup>o</sup>                         | 101.048(2)                                         | 101.4490(10)                                                        | 102.9490(10)                                                    | 99.170(3)                                                                         | 89.773(4)                                                       |
| <i>g</i> <sup>o</sup>                         | 90                                                 | 90                                                                  | 90                                                              | 90                                                                                | 81.732(4)                                                       |
| <i>V</i> /Å <sup>3</sup>                      | 2398.66(13)                                        | 4731.92(13)                                                         | 3450.91(7)                                                      | 2059.85(9)                                                                        | 1855.28(17)                                                     |
| <i>Z</i>                                      | 4                                                  | 4                                                                   | 4                                                               | 2                                                                                 | 2                                                               |
| <i>Z'</i>                                     | 1                                                  | 1                                                                   | 1                                                               | 0.5                                                                               | 1                                                               |
| Wavelength/Å                                  | 1.54184                                            | 0.71073                                                             | 1.54184                                                         | 1.54184                                                                           | 1.54184                                                         |
| Radiation type                                | CuK <sub>α</sub>                                   | MoK <sub>α</sub>                                                    | CuK <sub>α</sub>                                                | CuK <sub>α</sub>                                                                  | CuK <sub>α</sub>                                                |
| <i>Q</i> <sub>min</sub> <sup>o</sup>          | 4.1160                                             | 3.370                                                               | 2.983                                                           | 5.157                                                                             | 5.069                                                           |
| <i>Q</i> <sub>max</sub> <sup>o</sup>          | 75.0100                                            | 34.549                                                              | 75.279                                                          | 74.066                                                                            | 71.725                                                          |
| Measured Refl's.                              | 8203                                               | 55081                                                               | 36548                                                           | 15304                                                                             | 12816                                                           |
| Ind't Refl's                                  | 4840                                               | 18675                                                               | 6922                                                            | 3980                                                                              | 7024                                                            |
| Refl's with <i>I</i> > 2( <i>I</i> )          | 4136                                               | 13489                                                               | 6330                                                            | 3136                                                                              | 6125                                                            |
| <i>R</i> <sub>int</sub>                       | 0.0757                                             | 0.0309                                                              | 0.0353                                                          | 0.0622                                                                            | 0.0289                                                          |
| Parameters                                    | 289                                                | 525                                                                 | 441                                                             | 273                                                                               | 375                                                             |
| Restraints                                    | 84                                                 | 126                                                                 | 120                                                             | 52                                                                                | 0                                                               |
| Largest Peak                                  | 1.772                                              | 1.098                                                               | 0.851                                                           | 0.827                                                                             | 0.555                                                           |
| Deepest Hole                                  | -0.758                                             | -0.448                                                              | -0.571                                                          | -0.371                                                                            | -0.543                                                          |
| GooF                                          | 1.055                                              | 1.026                                                               | 1.044                                                           | 1.082                                                                             | 1.030                                                           |
| <i>wR</i> <sub>2</sub> (all data)             | 0.1862                                             | 0.1252                                                              | 0.1255                                                          | 0.1626                                                                            | 0.0919                                                          |
| <i>wR</i> <sub>2</sub>                        | 0.1764                                             | 0.1141                                                              | 0.1226                                                          | 0.1532                                                                            | 0.0870                                                          |
| <i>R</i> <sub>1</sub> (all data)              | 0.0761                                             | 0.0687                                                              | 0.0509                                                          | 0.0655                                                                            | 0.0434                                                          |
| <i>R</i> <sub>1</sub>                         | 0.0678                                             | 0.0458                                                              | 0.0471                                                          | 0.0532                                                                            | 0.0356                                                          |

**Table S17.** Crystallographic details of **5**, **6'**, **7** and **8**.

| Compound                                      | 5                                                | 6'                                 | 7                                                               | 8                                                                                  |
|-----------------------------------------------|--------------------------------------------------|------------------------------------|-----------------------------------------------------------------|------------------------------------------------------------------------------------|
| CCDC                                          | 2041986                                          | 2247954                            | 2247955                                                         | 2247956                                                                            |
| Formula                                       | C <sub>29</sub> H <sub>40</sub> FeP <sub>6</sub> | C <sub>21</sub> H <sub>29</sub> PS | C <sub>18</sub> H <sub>27</sub> FeN <sub>2</sub> P <sub>5</sub> | C <sub>18</sub> H <sub>27</sub> Br <sub>2</sub> FeN <sub>2</sub> P <sub>5</sub> Zn |
| <i>D</i> <sub>calc.</sub> /g cm <sup>-3</sup> | 1.322                                            | 1.158                              | 1.443                                                           | 1.775                                                                              |
| <i>m</i> /mm <sup>-1</sup>                    | 6.812                                            | 2.178                              | 1.046                                                           | 11.978                                                                             |
| Formula Weight                                | 630.28                                           | 344.47                             | 482.11                                                          | 707.30                                                                             |
| Colour                                        | dark green                                       | colourless                         | dark brown                                                      | green                                                                              |
| Shape                                         | block                                            | block-shaped                       | block                                                           | plate-shaped                                                                       |
| Size/mm <sup>3</sup>                          | 0.30×0.18×0.15                                   | 0.20×0.09×0.05                     | 0.28×0.22×0.18                                                  | 0.11×0.07×0.02                                                                     |
| <i>T</i> /K                                   | 123(1)                                           | 99.99(10)                          | 123(1)                                                          | 100.02(10)                                                                         |
| Crystal System                                | triclinic                                        | monoclinic                         | monoclinic                                                      | monoclinic                                                                         |
| Flack Parameter                               | /                                                | /                                  | /                                                               | /                                                                                  |
| Hooft Parameter                               | /                                                | /                                  | /                                                               | /                                                                                  |
| Space Group                                   | <i>P</i> -1                                      | <i>P</i> 2 <sub>1</sub> / <i>c</i> | <i>P</i> 2 <sub>1</sub> / <i>c</i>                              | <i>P</i> 2 <sub>1</sub> / <i>c</i>                                                 |
| <i>a</i> /Å                                   | 11.7026(6)                                       | 13.5196(3)                         | 12.6279(3)                                                      | 20.1798(6)                                                                         |
| <i>b</i> /Å                                   | 14.3826(5)                                       | 6.25270(10)                        | 13.0636(3)                                                      | 9.3717(3)                                                                          |
| <i>c</i> /Å                                   | 18.9471(7)                                       | 23.3769(6)                         | 13.8564(3)                                                      | 14.2681(4)                                                                         |
| <i>a</i> <sup>o</sup>                         | 85.336(3)                                        | 90                                 | 90                                                              | 90                                                                                 |
| <i>b</i> <sup>o</sup>                         | 85.053(4)                                        | 91.391(2)                          | 103.793(2)                                                      | 101.165(3)                                                                         |
| <i>g</i> <sup>o</sup>                         | 88.352(4)                                        | 90                                 | 90                                                              | 90                                                                                 |
| <i>V</i> /Å <sup>3</sup>                      | 3165.9(2)                                        | 1975.56(7)                         | 2219.92(9)                                                      | 2647.30(14)                                                                        |
| <i>Z</i>                                      | 4                                                | 4                                  | 4                                                               | 4                                                                                  |
| <i>Z'</i>                                     | 2                                                | 1                                  | 1                                                               | 1                                                                                  |
| Wavelength/Å                                  | 1.54184                                          | 1.54184                            | 0.71073                                                         | 1.54184                                                                            |
| Radiation type                                | CuK <sub>α</sub>                                 | CuK <sub>α</sub>                   | MoK <sub>α</sub>                                                | CuK <sub>α</sub>                                                                   |
| <i>Q</i> <sub>min</sub> <sup>o</sup>          | 3.726                                            | 3.270                              | 3.322                                                           | 4.467                                                                              |
| <i>Q</i> <sub>max</sub> <sup>o</sup>          | 73.574                                           | 74.458                             | 32.430                                                          | 74.907                                                                             |
| Measured Refl's.                              | 32841                                            | 19848                              | 20964                                                           | 9190                                                                               |
| Ind't Refl's                                  | 12335                                            | 3959                               | 7231                                                            | 9190                                                                               |
| Refl's with <i>I</i> > 2( <i>I</i> )          | 9948                                             | 3575                               | 6242                                                            | 7281                                                                               |
| <i>R</i> <sub>int</sub>                       | 0.0356                                           | 0.0250                             | 0.0216                                                          | .                                                                                  |
| Parameters                                    | 1206                                             | 212                                | 258                                                             | 268                                                                                |
| Restraints                                    | 753                                              | 0                                  | 6                                                               | 0                                                                                  |
| Largest Peak                                  | 0.670                                            | 0.662                              | 0.519                                                           | 0.909                                                                              |
| Deepest Hole                                  | -0.766                                           | -0.300                             | -0.294                                                          | -1.155                                                                             |
| GooF                                          | 1.068                                            | 1.047                              | 1.037                                                           | 1.109                                                                              |
| <i>wR</i> <sub>2</sub> (all data)             | 0.1471                                           | 0.1110                             | 0.0729                                                          | 0.1533                                                                             |
| <i>wR</i> <sub>2</sub>                        | 0.1432                                           | 0.1075                             | 0.0693                                                          | 0.1448                                                                             |
| <i>R</i> <sub>1</sub> (all data)              | 0.0737                                           | 0.0473                             | 0.0377                                                          | 0.0705                                                                             |
| <i>R</i> <sub>1</sub>                         | 0.0626                                           | 0.0427                             | 0.0293                                                          | 0.0542                                                                             |

**[K(18c6)(THF)][Cp\*Fe( $\eta^4$ -P<sub>5</sub>-C≡CPh)] (1c)**

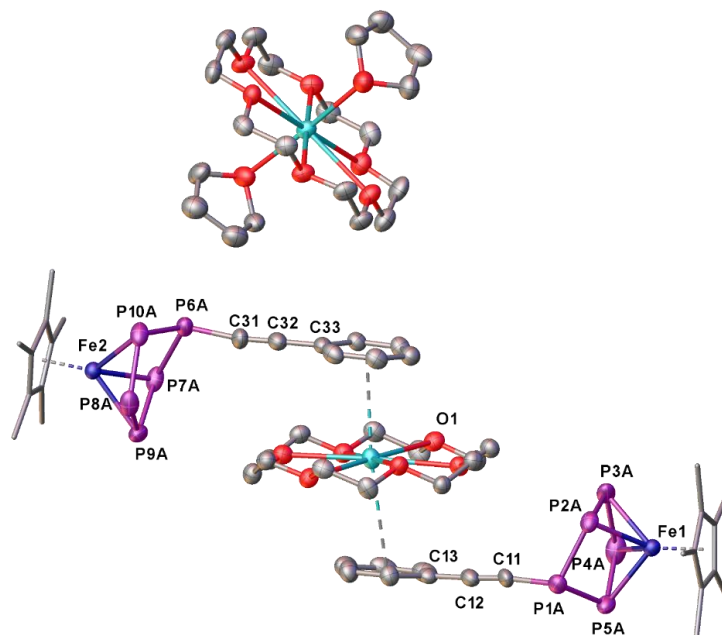

**Fig. S34.** Molecular structure of **1c** with thermal ellipsoids at 50% probability level. The hydrogen atoms are omitted for clarity. The Cp\* ligands are drawn in the wire frame model.

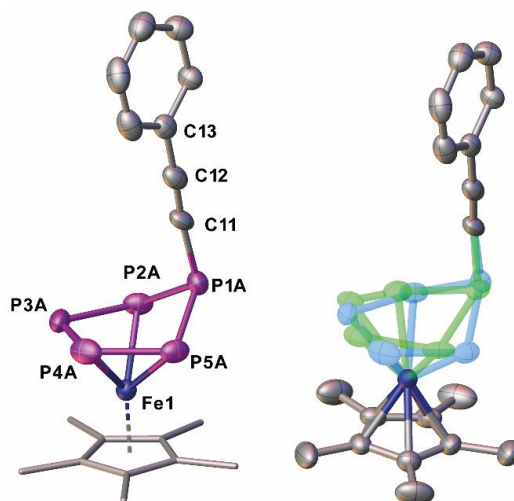

**Fig. S35.** Side view of the molecular structure of **1c** with thermal ellipsoids at 50 % probability level. The disorder is highlighted blue (Part 1) and green (Part 2). The hydrogen atoms are omitted for clarity. The Cp\* ligand is drawn in the wire frame model.

**Table S18.** Selected bond lengths of **1c**.

| Atom-Atom | Length [Å] |
|-----------|------------|
| P1A-P2A   | 2.142(5)   |
| P1A-P5A   | 2.162(3)   |
| P2A-P3A   | 2.187(3)   |
| P3A-P4A   | 2.127(4)   |

| Atom-Atom | Length [Å] |
|-----------|------------|
| P1A-C11   | 1.782(7)   |
| Fe1-P2A   | 2.322(3)   |
| Fe1-P3A   | 2.312(2)   |
| Fe1-P4A   | 2.338(2)   |

|         |          |
|---------|----------|
| P4A-P5A | 2.142(3) |
|---------|----------|

|         |          |
|---------|----------|
| Fe1-P5A | 2.317(2) |
|---------|----------|

**Table S19.** Selected angles of **1c**.

| Atom-Atom-Atom | Angle [°]  |
|----------------|------------|
| P5A-P1A-P2A    | 93.56(16)  |
| P3A-P2A-P1A    | 107.09(16) |
| P4A-P3A-P2A    | 103.14(13) |

| Atom-Atom-Atom | Angle [°]  |
|----------------|------------|
| P3A-P4A-P5A    | 103.82(11) |
| P4A-P5A-P1A    | 107.18(14) |

**[Cp\*Fe{η<sup>4</sup>-P<sub>5</sub>tBu(CH<sub>2</sub>)<sub>3</sub>Br}] (2a)**

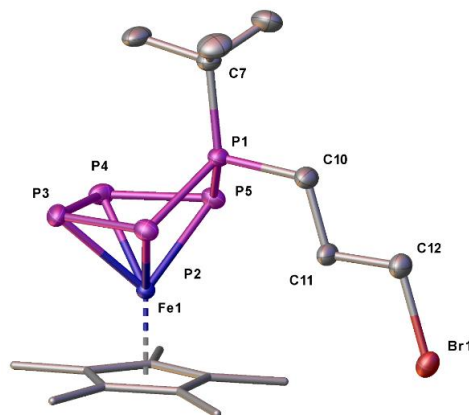

**Fig. S36.** Molecular structure of **2a** with thermal ellipsoids at 50% probability level. The hydrogen atoms are omitted for clarity. The Cp\* ligand is drawn in the wire frame model.

**Table S20.** Selected bond lengths of **2a**.

| Atom-Atom | Length [Å] |
|-----------|------------|
| P1-P2     | 2.1580(7)  |
| P2-P3     | 2.1461(8)  |
| P3-P4     | 2.1594(11) |
| P4-P5     | 2.1461(8)  |
| P1-P5     | 2.1580(7)  |
| P1-C7     | 1.871(3)   |
| C12-Br1   | 1.950(3)   |

| Atom-Atom | Length [Å] |
|-----------|------------|
| Fe1-P2    | 2.3425(6)  |
| Fe1-P3    | 2.3334(6)  |
| Fe1-P4    | 2.3334(6)  |
| Fe1-P5    | 2.3425(6)  |
| Fe1-P1    | 3.1105(9)  |
| P1-C10    | 1.838(3)   |

**Table S21.** Selected angles of **2a**.

| Atom-Atom-Atom | Angle [°]   |
|----------------|-------------|
| P1-P2-P3       | 99.57(3)    |
| P2-P3-P4       | 104.662(19) |
| P4-P5-P1       | 99.57(3)    |
| P5-P1-C10      | 120.16(5)   |
| C10-P1-C12     | 103.94(14)  |

| Atom-Atom-Atom | Angle [°]   |
|----------------|-------------|
| P3-P4-P5       | 104.662(19) |
| P5-P1-P2       | 97.53(4)    |
| P5-P1-C7       | 120.16(5)   |
| P2-P1-C7       | 120.16(5)   |
| P2-P1-C10      | 107.04(7)   |



**[Cp\*Fe{ $\eta^4$ -P<sub>5</sub>Me(CH<sub>2</sub>)<sub>3</sub>Br}] (2b)**

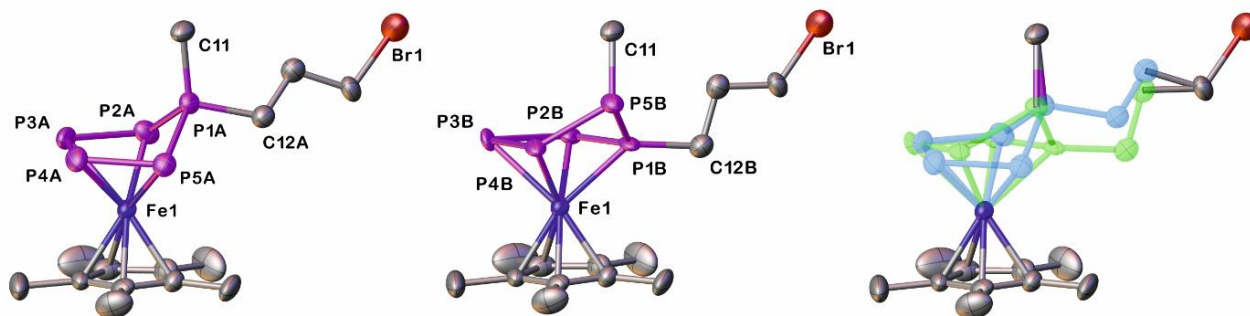

**Fig. S37.** Molecular structure of **2b** (left part) and **2b'** (middle part) with thermal ellipsoids at 50% probability level. The hydrogen atoms are omitted for clarity. The disorder is highlighted blue (Part 1) and green (Part 2). The Cp\* ligands are drawn in the wire frame model.

**Table S22.** Selected bond lengths of **2b** and **2b'**.

| Atom-Atom          | Length [Å] | Atom-Atom           | Length [Å] |
|--------------------|------------|---------------------|------------|
| <b>Part 1 – 2b</b> |            | <b>Part 2 – 2b'</b> |            |
| P1A-P2A            | 2.129(3)   | P1B-P2B             | 2.07(4)    |
| P1A-P5A            | 2.142(3)   | P1B-P5B             | 2.11(3)    |
| P2A-P3A            | 2.147(4)   | P2B-P3B             | 2.34(8)    |
| P3A-P4A            | 2.143(11)  | P3B-P4B             | 2.33(8)    |
| P4A-P5A            | 2.119(9)   | P4B-P5B             | 2.18(3)    |
| P1A-C11            | 1.817(8)   | P1B-C12B            | 1.84(3)    |
| P1A-C12A           | 1.842(9)   |                     |            |

**Table S23.** Selected angles of **2b** and **2b'**.

| Atom-Atom-Atom     | Angle [°] | Atom-Atom-Atom      | Angle [°] |
|--------------------|-----------|---------------------|-----------|
| <b>Part 1 – 2b</b> |           | <b>Part 2 – 2b'</b> |           |
| P5A-P1A-P2A        | 98.89(14) | P7-P8B-P9B          | 98.3(4)   |
| P3A-P2A-P1A        | 99.49(14) | P8B-P9B-P10B        | 106.1(6)  |
| P4A-P3A-P2A        | 103.9(2)  | P9B-P10B-P11B       | 101.6(8)  |
| P3A-P4A-P5A        | 106.0(3)  | P11B-P7-P8B         | 91.9(8)   |
| P4A-P5A-P1A        | 99.1(3)   | P8B-P7-C30          | 129.2(3)  |

**[Cp\*Fe{ $\eta^4$ -P<sub>5</sub>(-C≡CPh)Me}] (2c)**

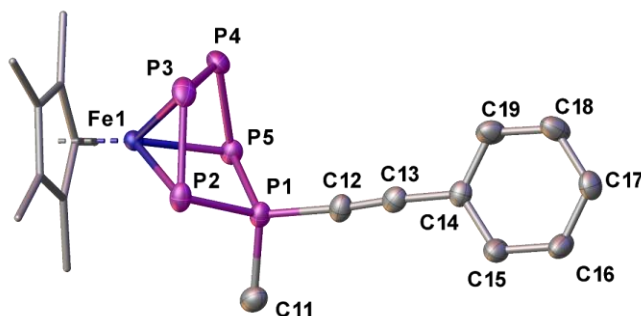

**Fig. S38.** Molecular structure of **2c** with thermal ellipsoids at 50% probability level. The hydrogen atoms are omitted for clarity. The Cp\* ligand is drawn in the wire frame model.

**Table S24.** Selected bond lengths of **2c**.

| Atom-Atom | Length [Å] |
|-----------|------------|
| P1–P5     | 2.1405(6)  |
| P1-P2     | 2.1425(6)  |
| P1-C12    | 1.7582(18) |
| P1-C11    | 1.821(2)   |

| Atom-Atom | Length [Å] |
|-----------|------------|
| P2-P3     | 2.1419(7)  |
| P4-P4     | 2.1538(7)  |
| C13-C12   | 1.197(3)   |
| P5-P4     | 2.1399(6)  |

**Table S25.** Selected angles of **2c**.

| Atom-Atom-Atom | Angle [°]  |
|----------------|------------|
| P5-P1-P2       | 93.56(16)  |
| C12-P1-P5      | 107.09(16) |
| C12-P1-P2      | 103.14(13) |

| Atom-Atom-Atom | Angle [°]  |
|----------------|------------|
| C12-P1-C11     | 103.82(11) |
| C11-P1-P5      | 107.18(14) |
| P1-C12-C13     | 175.74(18) |

**[Cp\*Fe{ $\eta^4$ -P<sub>5</sub>Me(CH<sub>2</sub>)<sub>3</sub>CN}] (2d)**

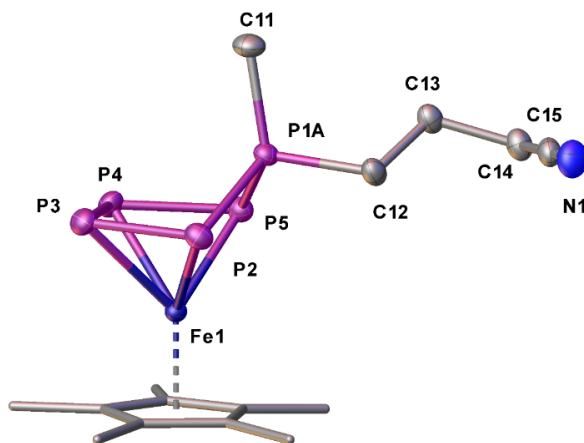

**Fig. S39.** Molecular structure of **2d** with thermal ellipsoids at 50% probability level. The hydrogen atoms are omitted for clarity. The Cp\* ligand is drawn in the wire frame model.

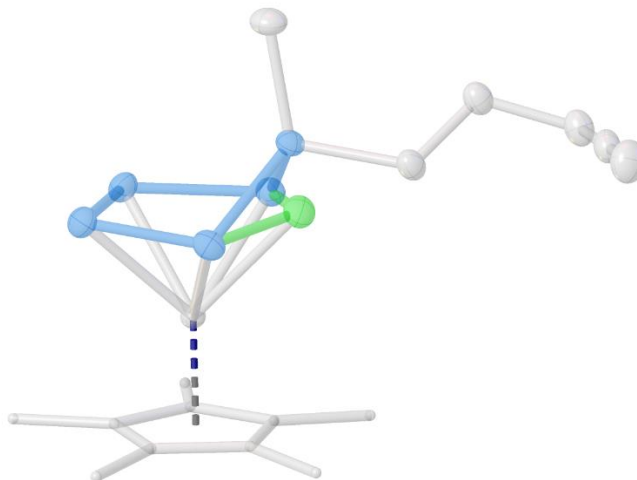

**Fig. S40.** Side view of the mixed crystal of **1** and **2d** with thermal ellipsoids at 50% probability level. The disordered P<sub>5</sub> middle decks are highlighted green (**1**) and blue (**3a**). The Cp\* ligand is drawn in the wire frame model.

**Table S26.** Selected bond lengths of **2d**.

| Atom-Atom | Length [Å] |
|-----------|------------|
| P1A–P2    | 2.1462(6)  |
| P2–P3     | 2.1465(6)  |
| P3–P4     | 2.1589(6)  |
| P4–P5     | 2.1384(6)  |
| P1A–P5    | 2.1499(5)  |
| P1A–C11   | 1.8214(17) |
| N1–C15    | 1.142(2)   |

| Atom-Atom | Length [Å] |
|-----------|------------|
| Fe1–P2    | 2.3340(4)  |
| Fe1–P3    | 2.3355(4)  |
| Fe1–P4    | 2.3422(4)  |
| Fe1–P5    | 2.3199(5)  |
| Fe1–P1A   | 3.0591(5)  |
| P1–C12    | 1.8284(16) |
|           |            |

**Table S27.** Selected angles of **2d**.

| Atom-Atom-Atom | Angle [°] |
|----------------|-----------|
| P1A–P2–P3      | 97.27(2)  |
| P2–P3–P4       | 105.34(2) |
| P4–P5–P1       | 105.8(3)  |
| P5–P1A–C11     | 118.98(6) |
| C10–P1A–C12    | 106.50(8) |

| Atom-Atom-Atom | Angle [°] |
|----------------|-----------|
| P3–P4–P5       | 104.28(2) |
| P5–P1A–P2      | 98.48(2)  |
| P5–P1A–C11     | 118.98(6) |
| P5–P1A–C12     | 106.70(6) |
| P2–P1A–C11     | 118.07(6) |

**[Cp\*Fe{η<sup>4</sup>-P<sub>5</sub>Me(CH<sub>2</sub>)<sub>4</sub>Br}] (2e)**

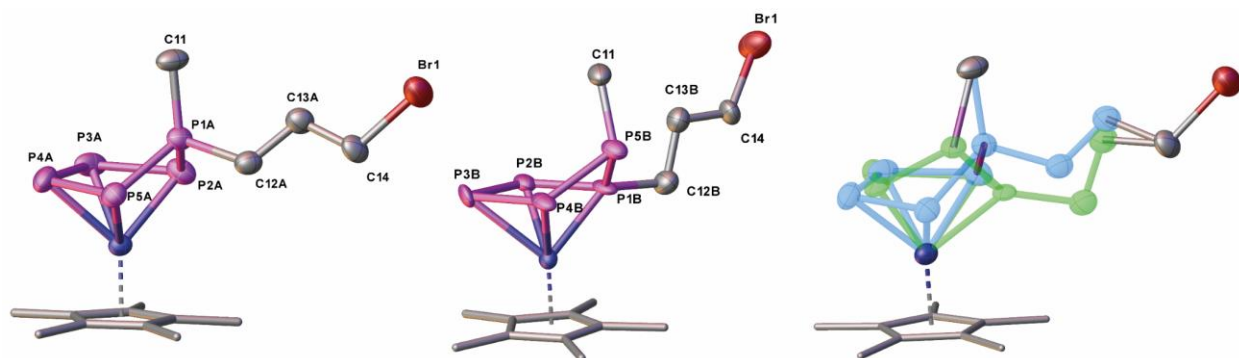

**Fig. S41.** Molecular structure of **2e** (left part) and **2e'** (middle part) with thermal ellipsoids at 50% probability level. The hydrogen atoms are omitted for clarity. The disorder is highlighted blue (Part 1) and green (Part 2). The Cp\* ligands are drawn in the wire frame model.

**Table S28.** Selected bond lengths of **2e** and **2e'**.

| Atom-Atom          | Length [Å] | Atom-Atom           | Length [Å] |
|--------------------|------------|---------------------|------------|
| <b>Part 1 – 2e</b> |            | <b>Part 2 – 2e'</b> |            |
| P1A-P2A            | 2.142(3)   | C11-P5B             | 1.88(2)    |
| P1A-P5A            | 2.129(3)   | C12A-C13A           | 1.526(14)  |
| P1A-C11            | 1.817(8)   | P4B-P5B             | 2.18(3)    |
| P1A-C12A           | 1.842(9)   | P5B-P1B             | 2.11(3)    |
| P2A-P3A            | 2.119(9)   | P1B-P2B             | 2.07(4)    |
| P3A-P4A            | 2.143(11)  | P1B-C12B            | 1.84(3)    |
| P5A-P4A            | 2.147(4)   | C14-Br1             | 1.938(8)   |

**Table S29.** Selected angles of **2e** and **2e'**.

| Atom-Atom-Atom     | Angle [°] | Atom-Atom-Atom      | Angle [°] |
|--------------------|-----------|---------------------|-----------|
| <b>Part 1 – 2e</b> |           | <b>Part 2 – 2e'</b> |           |
| P5A-P1A-P2A        | 98.89(14) | P5B-P4B-P3B         | 115(3)    |
| C11-P1A-P2A        | 120.0(3)  | C11-P5B-P4B         | 117.6(13) |
| C11-P1A-P5A        | 117.8(4)  | C11-P5B-P1B         | 100.2(12) |
| C11-P1A-C12A       | 107.5(4)  | P1B-P5B-P4B         | 84.8(11)  |
| C12A-P1A-P2A       | 106.6(3)  | C13B-C12B-P1B       | 103(3)    |

**$[(\text{Cp}^*\text{Fe})_2\{\mu,\eta^{4:4}\text{-P}_5\text{tBu}(\text{CH}_2)_3\text{P}_5\text{tBu}\}]$  (**3a**)**

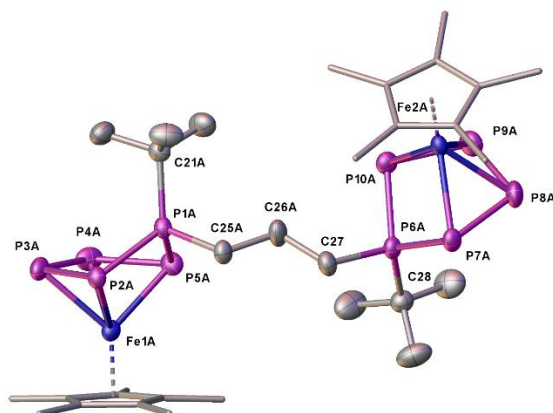

**Fig. S42.** Molecular structure of **3a** with thermal ellipsoids at 50% probability level. The hydrogen atoms are omitted for clarity. The Cp\* ligands are drawn in the wire frame model.

**$[(\text{Cp}^*\text{Fe})_2\{\mu,\eta^{4:4}\text{-P}_5\text{tBu}(\text{CH}_2)_3\text{P}_5\text{tBu}\}]$  (**3a'**)**

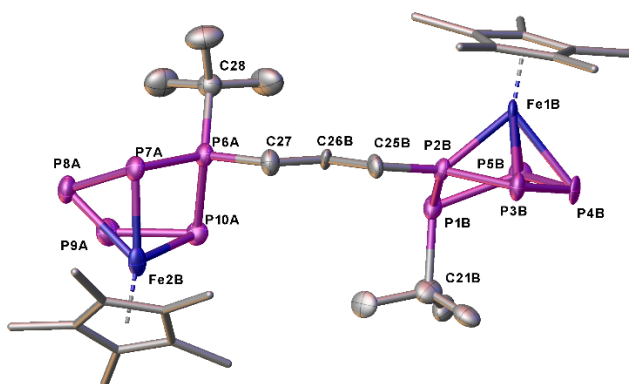

**Fig. S43.** Molecular structure of **3a'** with thermal ellipsoids at 50% probability level. The hydrogen atoms are omitted for clarity. The Cp\* ligands are drawn in the wire frame model.

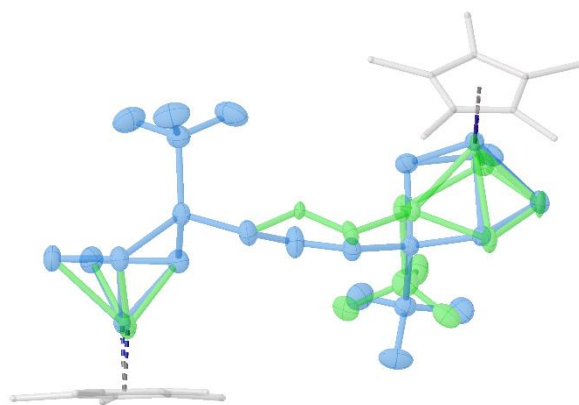

**Fig. S44.** Molecular structure of **3a**, highlighted blue (Part 1), and **3a'**, highlighted green (Part 2), with thermal ellipsoids at 50 % probability level. The hydrogen atoms and solvent molecules are omitted for clarity.

**Table S 30.** Selected bond lengths of **3a** and **3a'**.

| Atom-Atom           | Length [Å] | Atom-Atom           | Length [Å] |
|---------------------|------------|---------------------|------------|
| <b>Part 1 – 3a</b>  |            | <b>Part 1 – 3a</b>  |            |
| P1A–P2A             | 2.1514(9)  | P6A–P7A             | 2.1503(7)  |
| P2A–P3A             | 2.1422(15) | P7A–P8A             | 2.1419(8)  |
| P3A–P4A             | 2.1518(18) | P8A–P9A             | 2.1499(9)  |
| P4A–P5A             | 2.1422(11) | P9A–P10A            | 2.1361 (8) |
| P1A–P5A             | 2.1454(7)  | P6A–P10A            | 2.1508(7)  |
| P1A–C21A            | 1.876(2)   | P6A–C28             | 1.870(2)   |
| P1A–C25A            | 1.847(2)   | P6A–C21             | 1.848(2)   |
| <b>Part 2 – 3a'</b> |            | <b>Part 2 – 3a'</b> |            |
| P1B–P2B             | 2.098(9)   | P6A–P7A             | 2.1503(7)  |
| P2B–P3B             | 2.140(10)  | P7A–P8A             | 2.1419(8)  |
| P3B–P4B             | 2.179(19)  | P8A–P9A             | 2.1499(9)  |
| P4B–P5B             | 2.140(18)  | P9A–P10A            | 2.1361 (8) |
| P1B–P5B             | 2.213(12)  | P6A–P10A            | 2.1508(7)  |
| P1B–C21B            | 1.98(3)    | P6A–C28             | 1.870(2)   |
| P2B–C25B            | 1.84 (2)   | P6A–C21             | 1.848(2)   |

**Table S31.** Selected angles of **3a** and **3a'**.

| Atom-Atom-Atom      | Angle [°]  | Atom-Atom-Atom      | Angle [°]  |
|---------------------|------------|---------------------|------------|
| <b>Part 1 – 3a</b>  |            | <b>Part 1 – 3a</b>  |            |
| P1A–P2A–P3A         | 100.49(5)  | P6A–P7A–P8A         | 100.91(3)  |
| P2A–P3A–P4A         | 104.81(4)  | P8A–P9A–P10A        | 105.20(3)  |
| P1A–P5A–P2A         | 98.58(3)   | P9A–P10A–P6A        | 100.71(3)  |
| P2A–P1A–C21A        | 120.23(7)  | P7A–P6A–C28         | 119.33(7)  |
| P2A–P1A–C25A        | 104.01(8)  | C27–P6A–C28         | 106.91(10) |
| P5A–P1A–C21A        | 118.92(7)  | C21A– P1A–C25A      | 108.59(10) |
| <b>Part 2 – 3a'</b> |            | <b>Part 2 – 3a'</b> |            |
| P6A–P7A–P8A         | 100.91(3)  | P1B–P2B–P3B         | 119.5(4)   |
| P7A–P8A–P9A         | 105.20(3)  | P2B–P3B–P4B         | 95.1(6)    |
| P9A–P10A–P6A        | 100.71(3)  | P4B–P5B–P1B         | 111.3(7)   |
| P7A–P6A–C28         | 119.33(7)  | P2B–P1B–C21B        | 111.9(9)   |
| C27–P6A–C28         | 106.91(10) | P2B–P1B–C25B        | 114.4(9)   |
| C21A– P1A–C25A      | 108.59(10) | P5B–P1B–C21B        | 113.9(10)  |

**$[(\text{Cp}^*\text{Fe})_2\{\mu,\eta^{4:4}\text{-P}_5\text{Me}(\text{CH}_2)_3\text{P}_5\text{Me}\}]$  (**3b**)**

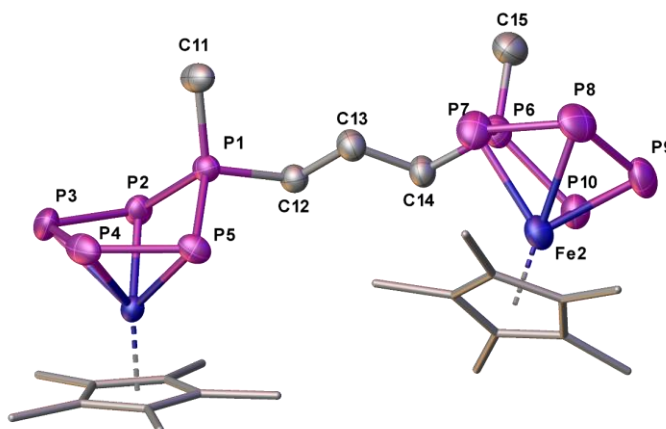

**Fig. S45.** Molecular structure of **3b** with thermal ellipsoids at 50% probability level. The hydrogen atoms are omitted for clarity. The Cp\* ligands are drawn in the wire frame model.

**Table S32.** Selected bond lengths of **3b**.

| Atom-Atom | Length [Å] |
|-----------|------------|
| P1-P2     | 2.1407(12) |
| P2-P5     | 2.1417(11) |
| P2-P3     | 2.1394(13) |
| P1-C11    | 1.816(3)   |
| P6-C14    | 1.829(3)   |
| P6-C15    | 1.814(4)   |
| P7-P8     | 2.1360(16) |

| Atom-Atom | Length [Å] |
|-----------|------------|
| P1-C12    | 1.824(3)   |
| P4-P5     | 2.1358(14) |
| P6-P10    | 2.1488(14) |
| P6-P7     | 2.1290(15) |
| P9-P10    | 2.1361(14) |
| P3-P4     | 2.1488(16) |
| P9-P8     | 2.1434(19) |

**Table S33.** Selected angles of **3b**.

| Atom-Atom-Atom | Angle [°]  |
|----------------|------------|
| P2-P1-P5       | 98.46(4)   |
| C12-P1-P2      | 105.49(11) |
| C12-P1-P5      | 105.89(11) |
| C11-P1-P2      | 119.77(14) |
| C11-P1-P5      | 119.09(12) |
| C14-P6-P7      | 106.83(12) |
| C15-P6-P7      | 118.38(16) |

| Atom-Atom-Atom | Angle [°]  |
|----------------|------------|
| C11-P1-C12     | 106.74(15) |
| P1-P2-P3       | 99.61(5)   |
| P5-P4-P1       | 99.46(5)   |
| P6-P7-P10      | 100.00(6)  |
| C14-P6-P10     | 103.83(12) |
| C15-P6-P10     | 121.22(16) |
| C15-P6-C14     | 105.10(18) |

**[(Cp\*Fe)<sub>2</sub>{μ,η<sup>4:4</sup>-P<sub>5</sub>Me(CH<sub>2</sub>)<sub>4</sub>P<sub>5</sub>Me}] (3c)**

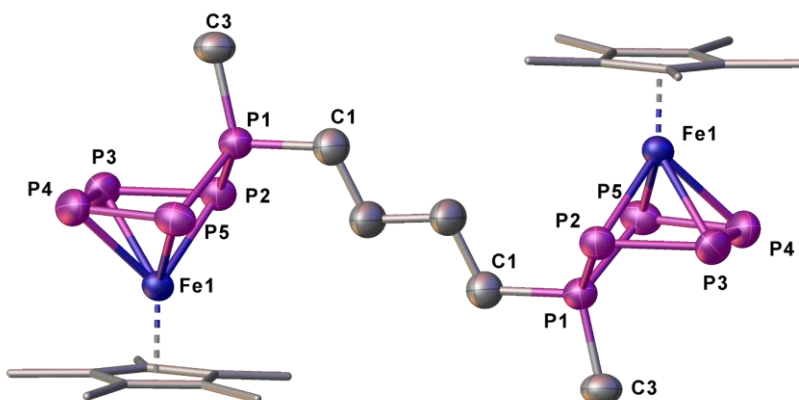

**Fig. S46.** Molecular structure of **3c** with thermal ellipsoids at 50% probability level. The hydrogen atoms are omitted for clarity. The Cp\* ligands are drawn in the wire frame model.

**Table S34.** Selected bond lengths of **3c**.

| Atom-Atom | Length [Å] |
|-----------|------------|
| P1-P2     | 2.1479(14) |
| P1-P5     | 2.1419(13) |
| P1-C3     | 1.812(4)   |
| P1-C1     | 1.826(4)   |

| Atom-Atom | Length [Å] |
|-----------|------------|
| P2-P3     | 2.1356(15) |
| P3-P4     | 2.1620(17) |
| P4-P5     | 2.1523(18) |
|           |            |

**Table S35.** Selected angles of **3e**.

| Atom-Atom-Atom | Angle [°]  |
|----------------|------------|
| P2-P1-P5       | 97.01(5)   |
| C3-P1-P2       | 117.83(15) |
| C3-P1-P5       | 118.61(15) |
| C3-P1-C1       | 102.88(19) |
| P3-P2-P1       | 97.95(6)   |

| Atom-Atom-Atom | Angle [°]  |
|----------------|------------|
| P2-P3-P4       | 104.18(6)  |
| P1-P5-P4       | 97.69(6)   |
| P5-P4-P3       | 104.19(6)  |
| C1-P1-P2       | 110.59(14) |
| C1-P1-P5       | 110.03(14) |



**[(Cp\*Fe)<sub>2</sub>{μ,η<sup>4:4</sup>-P<sub>5</sub>tBu(CH<sub>2</sub>)<sub>3</sub>P<sub>5</sub>Me}] (4)**

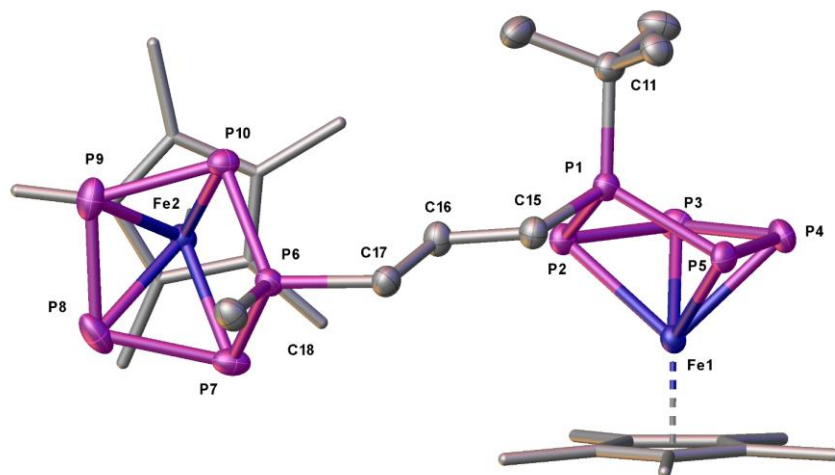

**Fig. S47.** Molecular structure of **4** with thermal ellipsoids at 50% probability level. The hydrogen atoms are omitted for clarity. The Cp\* ligands are drawn in the wire frame model.

**Table S36.** Selected bond lengths of **4**.

| Atom-Atom | Length [Å] |
|-----------|------------|
| P1–P2     | 2.1482(8)  |
| P2–P3     | 2.1370(9)  |
| P3–P4     | 2.1484(10) |
| P4–P5     | 2.1444(10) |
| P1–P5     | 2.1455(9)  |
| P1–C11    | 1.874(3)   |
| P1–C18    | 1.817(3)   |

| Atom-Atom | Length [Å] |
|-----------|------------|
| P6–P7     | 2.1451(9)  |
| P7–P8     | 2.1491(11) |
| P8–P9     | 2.1639(12) |
| P9–P10    | 2.1450(10) |
| P6–P10    | 2.1514(9)  |
| P6–C17    | 1.835(3)   |
| P1–C15    | 1.849(3)   |

**Table S37.** Selected angles of **4**.

| Atom-Atom-Atom | Angle [°]  |
|----------------|------------|
| P1–P2–P3       | 101.02(4)  |
| P2–P3–P4       | 105.30(4)  |
| P4–P5–P1       | 100.73(4)  |
| P5–P1–C15      | 104.54(9)  |
| P2–P1–C15      | 104.88(9)  |
| C11–P1–C15     | 107.36(12) |
| P6–P7–P8       | 96.71(4)   |
| P7–P8–P9       | 104.27(4)  |
| P9–P10–P6      | 97.12(4)   |
| P10–P6–C18     | 118.35(10) |
| C18–P6–C17     | 102.70(13) |

| Atom-Atom-Atom | Angle [°]  |
|----------------|------------|
| P3–P4–P5       | 105.16(4)  |
| P5–P1–P2       | 99.33(3)   |
| P5–P1–C11      | 117.90(8)  |
| P2–P1–C11      | 121.08(9)  |
| P2–P1–C15      | 104.88(9)  |
| P8–P9–P10      | 103.78(4)  |
| P17–P6–P7      | 96.46(3)   |
| P17–P6–C18     | 102.70(13) |
| P7–P6–C17      | 111.75(9)  |
| P7–P6–C18      | 118.35(10) |
| C17–P6–P10     | 111.57(9)  |

**[Cp\*Fe( $\eta^4$ -P5<sup>t</sup>Bu(CH<sub>2</sub>)<sub>3</sub>PPh<sub>2</sub>)] (5)**

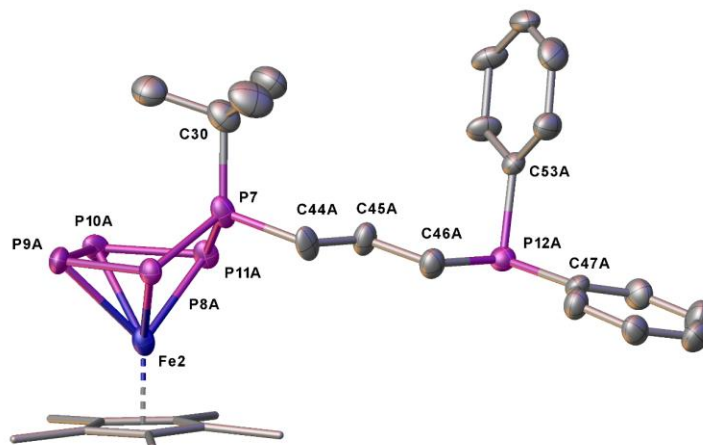

**Fig. S48.** Molecular structure of **5** with thermal ellipsoids at 50% probability level. The hydrogen atoms are omitted for clarity. The Cp\* ligand is drawn in the wire frame model.

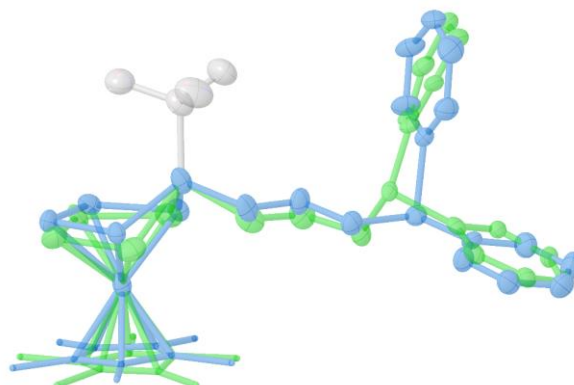

**Fig. S49.** Molecular structure of **5** with thermal ellipsoids at 50% probability level. The hydrogen atoms are omitted for clarity. The disorder is highlighted blue (Part 1) and green (Part 2). The Cp\* ligand is drawn in the wire frame model.

**Table S38.** Selected bond lengths of **5**.

| Atom-Atom     | Length [Å] | Atom-Atom     | Length [Å] |
|---------------|------------|---------------|------------|
| <b>Part 1</b> |            | <b>Part 2</b> |            |
| P7–P8A        | 2.147(3)   | P7–P8B        | 2.205(10)  |
| P8A–P9A       | 2.139(3)   | P8B–P9B       | 2.130(11)  |
| P9A–P10A      | 2.148(4)   | P9B–P10B      | 2.123(11)  |
| P10A–P11A     | 2.137(5)   | P10B–P11B     | 2.134(14)  |
| P7–P11A       | 2.140(4)   | P7–P11B       | 2.172(14)  |
| P7–C30        | 1.867(6)   | P7–C30        | 1.867(6)   |
| P7–C44A       | 1.829(5)   | P7–C44B       | 1.858(19)  |
| P12A–C46A     | 1.839(6)   | P12B–C46B     | 1.838(18)  |
| P12A–C53A     | 1.853(6)   | P12B–C53B     | 1.81(3)    |
| P12A–C47A     | 1.828(5)   | P12B–C47B     | 1.79(3)    |

**Table S39.** Selected angles of **5**.

| Atom-Atom-Atom | Angle [°]  | Atom-Atom-Atom | Angle [°] |
|----------------|------------|----------------|-----------|
| <b>Part 1</b>  |            | <b>2</b>       |           |
| P7-P8A-P9A     | 101.14(12) | P7-P8B-P9B     | 98.3(4)   |
| P8A-P9A-P10A   | 104.90(16) | P8B-P9B-P10B   | 106.1(6)  |
| P9A-P10A-P11A  | 106.0(2)   | P9B-P10B-P11B  | 101.6(8)  |
| P11A-P7-P8A    | 100.1(2)   | P11B-P7-P8B    | 91.9(8)   |
| P8A-P7-C30     | 118.15(19) | P8B-P7-C30     | 129.2(3)  |
| P11A-P7-C30    | 119.7(3)   | P11B-P7-C30    | 122.8(9)  |
| C30-P7-C44A    | 106.7(3)   | C30-P7-C44B    | 117.9(15) |
| C46A-P12A-C53A | 102.4(3)   | C46B-P12B-C53B | 102.3(15) |
| C46A-P12A-C47A | 102.5(3)   | C46B-P12B-C47B | 100.5(14) |
| C47A-P12A-C53A | 98.9(3)    | C47B-P12B-C53B | 102.3(15) |

**SP<sup>3</sup>BuBn((CH<sub>2</sub>)<sub>3</sub>Bn) (6')**

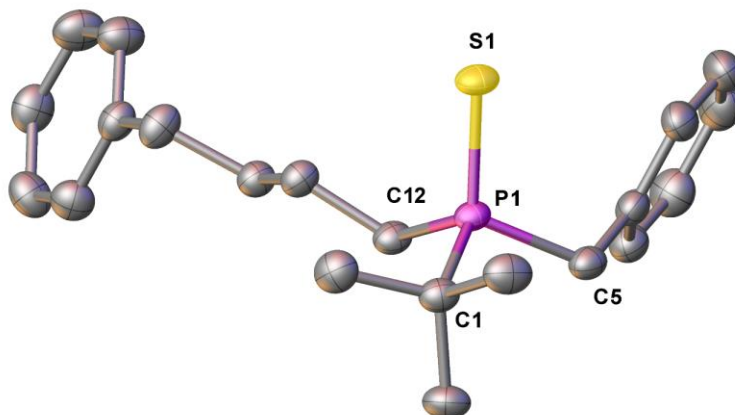

**Fig. S50.** Molecular structure of **6'** with thermal ellipsoids at 50% probability level. The hydrogen atoms are omitted for clarity.

**Table S40.** Selected bond lengths of **6'**.

| Atom-Atom | Length [Å] | Atom-Atom | Length [Å] |
|-----------|------------|-----------|------------|
| P1-S1     | 1.9575(6)  | P1-C12    | 1.8253(18) |
| P1-C1     | 1.8600(18) | P1-C5     | 1.8280(19) |

**Table S41.** Selected angles of **6'**.

| Atom-Atom-Atom | Angle [°] | Atom-Atom-Atom | Angle [°] |
|----------------|-----------|----------------|-----------|
| C1-P1-S1       | 112.49(6) | C12-P1-C5      | 103.10(8) |
| C12-P1-S1      | 112.40(6) | C5-P1-S1       | 113.49(6) |
| C12-P1-C1      | 110.13(8) | C5-P1-C1       | 104.58(8) |

**[Cp\*Fe{ $\eta^4$ -P<sub>5</sub>((CH<sub>2</sub>)<sub>3</sub>CN)<sub>2</sub>}] (7)**

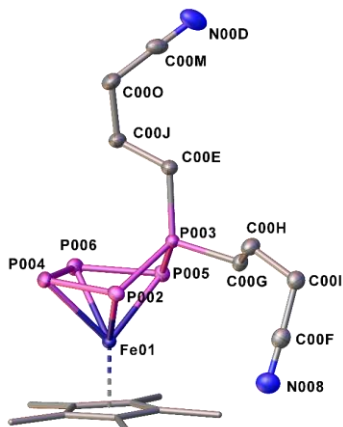

**Fig. S51.** Molecular structure of **7** with thermal ellipsoids at 50% probability level. The hydrogen atoms are omitted for clarity. The Cp\* ligand is drawn in the wire frame model.

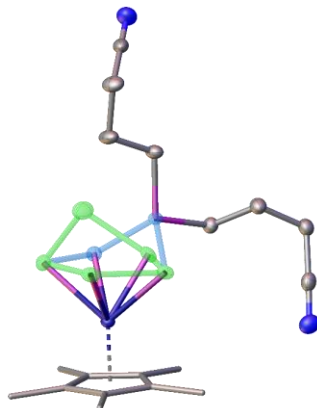

**Fig. S52.** Molecular structure of **7** with thermal ellipsoids at 50% probability level. The hydrogen atoms are omitted for clarity. The disorder is highlighted blue (Part 1) and green (Part 2). The Cp\* ligand is drawn in the wire frame model.

**Table S42.** Selected bond lengths of **7**.

| Atom-Atom | Length [Å] |
|-----------|------------|
| P002-P003 | 2.1478(5)  |
| P002-P004 | 2.1482(5)  |
| P003-P005 | 2.1498(5)  |
| P003-C00E | 1.8341(13) |

| Atom-Atom | Length [Å] |
|-----------|------------|
| P003-C00G | 1.8360(13) |
| P004-P006 | 2.1614(5)  |
| P005-P006 | 2.1446(5)  |

**Table S43.** Selected angles of **7**.

| Atom-Atom-Atom | Angle [°]  |
|----------------|------------|
| P003-P002-P004 | 99.561(19) |
| P002-P003-P005 | 98.259(18) |
| C00E-P003-P002 | 117.94(5)  |
| C00E-P003-P005 | 122.24(5)  |
| C00E-P003-C00G | 104.96(6)  |

| Atom-Atom-Atom | Angle [°]   |
|----------------|-------------|
| C00G-P003-P002 | 105.14(4)   |
| C00G-P003-P005 | 106.90(4)   |
| P002-P004-P006 | 104.727(19) |
| P005-P006-P004 | 104.643(19) |

**[[Cp\*Fe{η<sup>4</sup>-P<sub>5</sub>((CH<sub>2</sub>)<sub>3</sub>CN)<sub>2</sub>}ZnBr<sub>2</sub>] (8)**

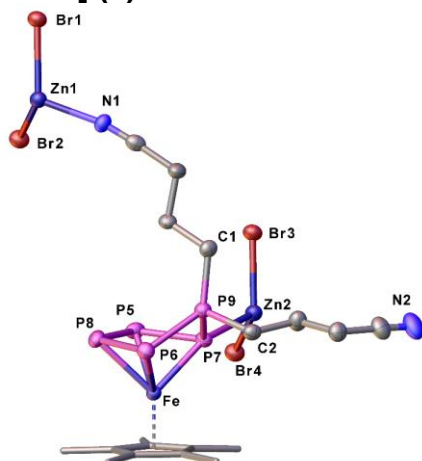

**Fig. S53.** Molecular structure of **8** with thermal ellipsoids at 50% probability level. The hydrogen atoms are omitted for clarity. The Cp\* ligand is drawn in the wire frame model.

**Table S44.** Selected bond lengths of **8**.

| Atom-Atom | Length [Å] |
|-----------|------------|
| P9-P7     | 2.141(2)   |
| P7-P5     | 2.143(3)   |
| P5-P8     | 2.140(3)   |
| P8-P6     | 2.137(3)   |
| P6-P9     | 2.168(2)   |

| Atom-Atom | Length [Å] |
|-----------|------------|
| N1-Zn1    | 2.053(6)   |
| Zn1-Br1   | 2.3533(12) |
| Zn1-Br2   | 2.3653(12) |
| P7-Zn2    | 2.4296(18) |

**Table S45.** Selected angles of **8**.

| Atom-Atom-Atom | Angle [°] |
|----------------|-----------|
| Br1-Zn1-Br2    | 121.57(5) |
| Br3-Zn2-P7     | 106.06(6) |
| Br4-Zn2-P7     | 108.40(6) |

| Atom-Atom-Atom | Angle [°]  |
|----------------|------------|
| N1-Zn1-Br1     | 109.88(18) |
| N1-Zn1-Br2     | 102.69(18) |
| N1-Zn1-P7      | 107.60(17) |

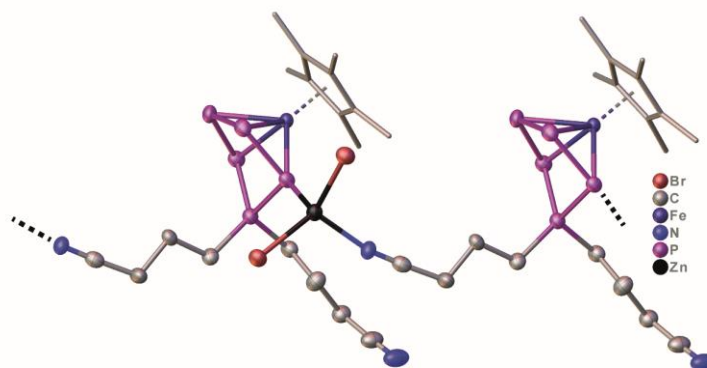

**Fig. S54.** Molecular structure of **8** as a grown structure with thermal ellipsoids at 50% probability level. The Cp\* ligands are drawn in the wire frame model.

## Additional information

### NMR Investigations

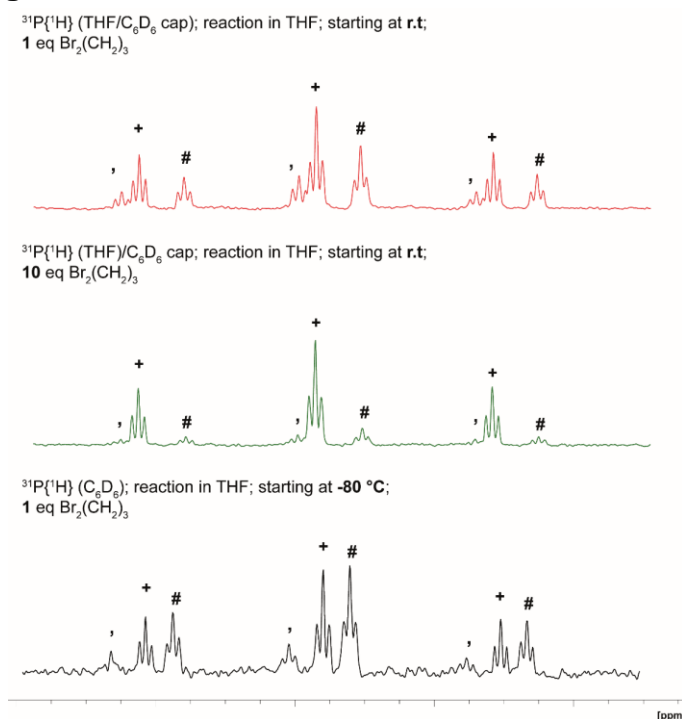

**Fig. S55.**  $^{31}\text{P}\{^1\text{H}\}$  NMR Spectra (161.98 MHz)/ Cutout: Reaction of **1a** with 1,3-dibromopropane at different reaction conditions (shifts are normalized for better overview) (+ = **2a**; # = **3a**; ' = **3a'**).

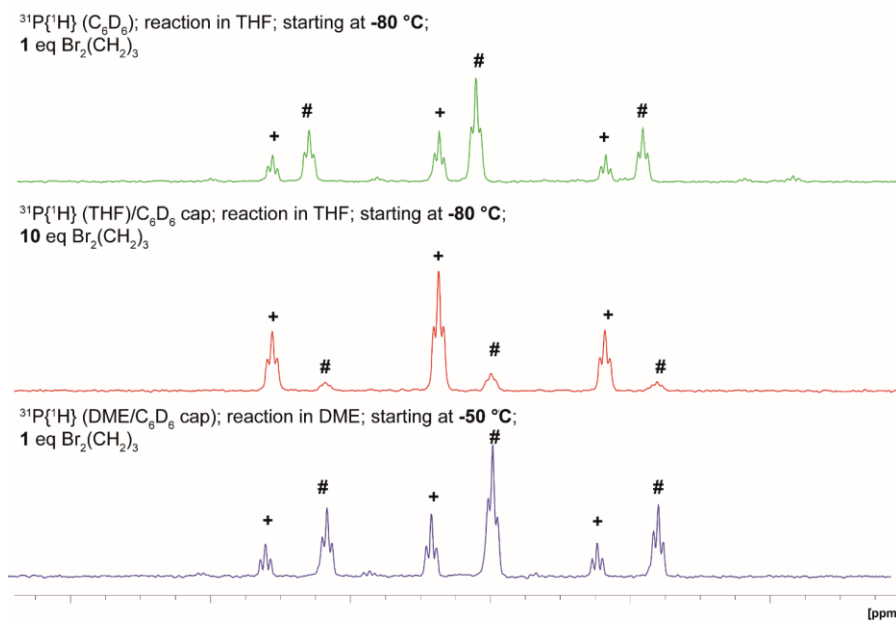

**Fig. S56.**  $^{31}\text{P}\{^1\text{H}\}$  NMR Spectra (161.98 MHz)/ Cutout: Reaction of **1b** with 1,3-dibromopropane at different reaction conditions (shifts are normalized for better overview) (+ = **2b**; # = **3b**).

$^{31}\text{P}\{^1\text{H}\}$  ( $\text{C}_6\text{D}_6$ ); reaction in THF; starting at  $-80\text{ }^\circ\text{C}$ ;  
1 eq  $\text{Br}_2(\text{CH}_2)_3$

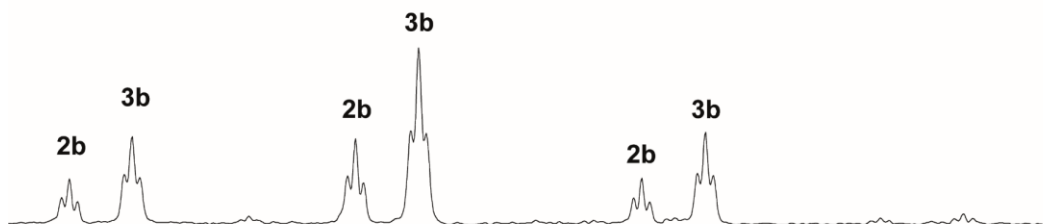

$^{31}\text{P}\{^1\text{H}\}$  ( $\text{C}_6\text{D}_6$ ); reaction in THF; starting at  $-80\text{ }^\circ\text{C}$ ;  
1 eq  $\text{Br}_2(\text{CH}_2)_4$

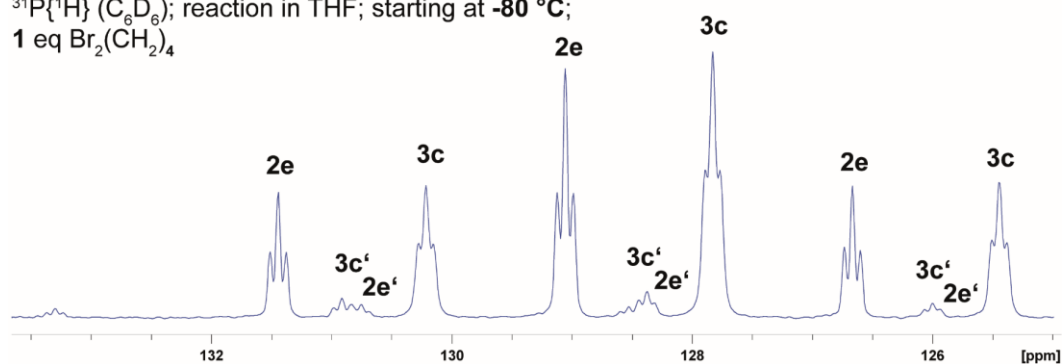

**Fig. S57.**  $^{31}\text{P}\{^1\text{H}\}$  NMR Spectra (161.98 MHz)/ Cutout: Reaction of **1b** with 1,3-dibromopropane (top) and 1,4-dibromobutane (button).

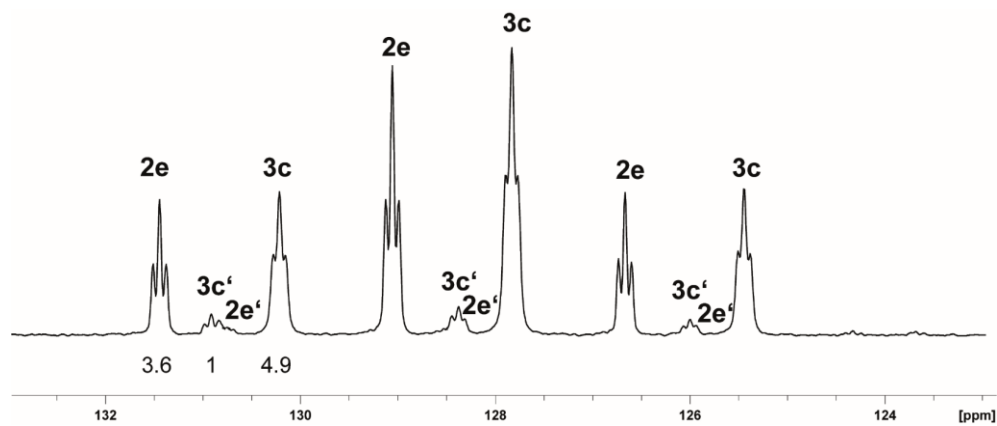

**Fig. S58.**  $^{31}\text{P}\{^1\text{H}\}$  NMR Spectra (161.98 MHz)/ Cutout: Reaction of **1b** with 1,4-dibromobutane.

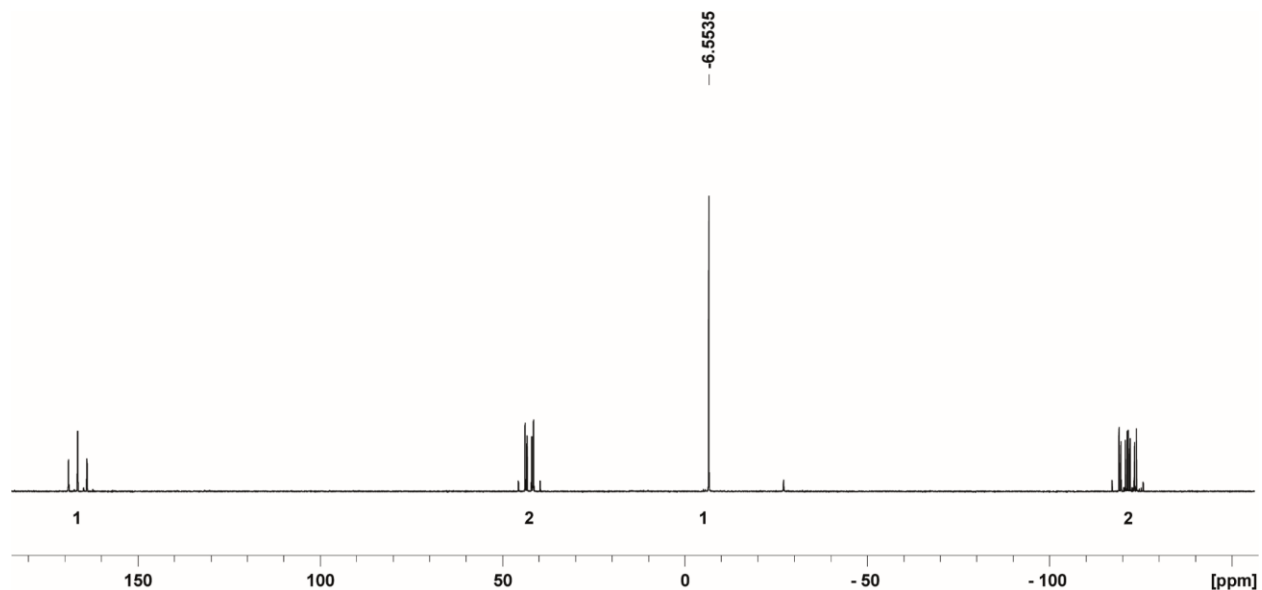

**Fig. S59.**  $^{31}\text{P}\{^1\text{H}\}$  NMR Spectra (161.98 MHz, THF/ $\text{C}_6\text{D}_6$  capillary): Reaction of **2a** with  $\text{LiPCy}_2$ .

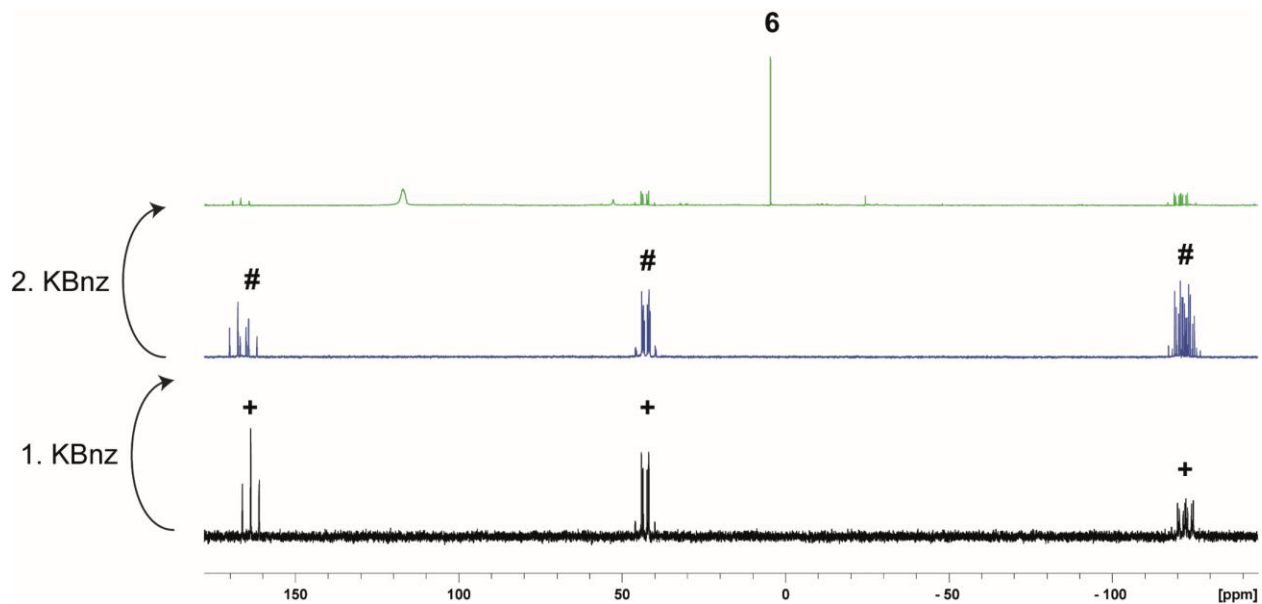

**Fig. S60.**  $^{31}\text{P}\{^1\text{H}\}$  NMR Spectra (161.98 MHz,  $\text{C}_6\text{D}_6$  or THF/ $\text{C}_6\text{D}_6$  capillary (middle spectra)): Reaction of **2a** with successive 2 eq KBn (+ = **2a**; # =  $[\text{Cp}^*\text{Fe}\{\eta^4\text{-P}_5^t\text{Bu}(\text{CH}_2)_3\text{Bn}\}]$ ).



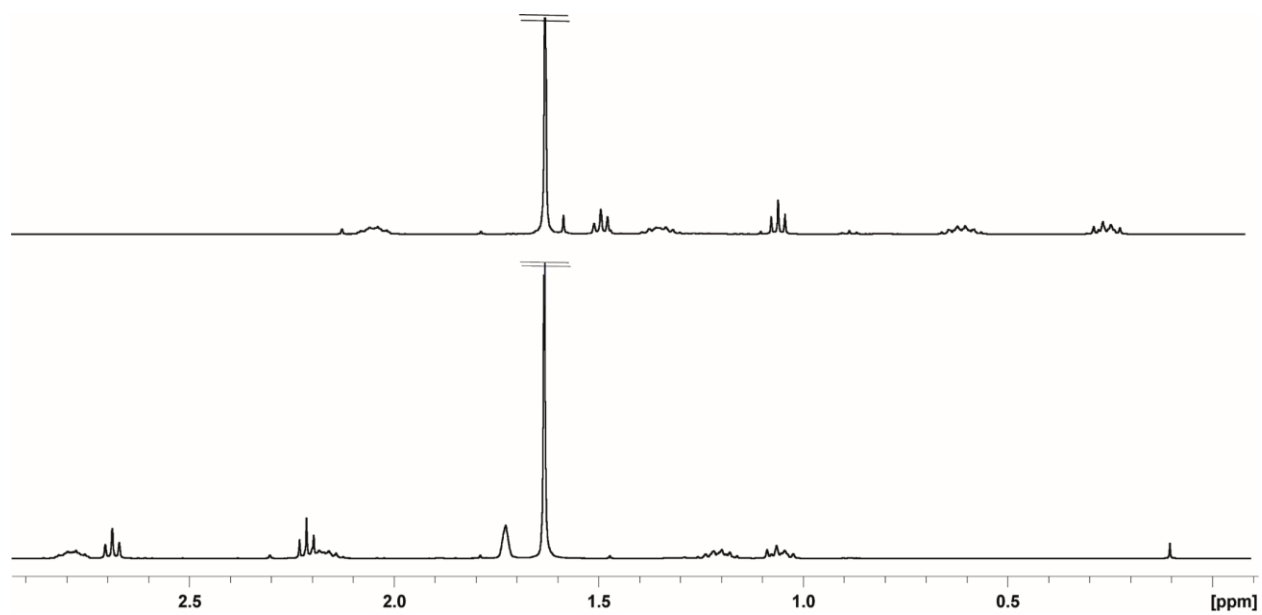

**Fig. S61.**  $^1\text{H}$  NMR Spectra (400.13 MHz)/ Cutout: Complex 7 (top,  $\text{C}_6\text{D}_6$ ) and Complex 8 (bottom,  $\text{THF-d}_8$ ).

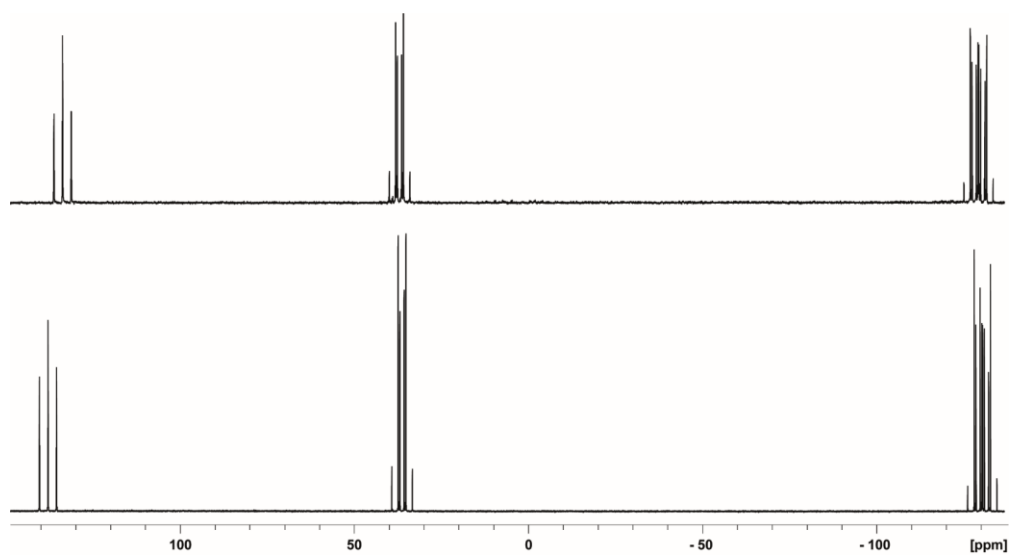

**Fig. S 62.**  $^{31}\text{P}\{^1\text{H}\}$  NMR Spectra (161.98 MHz): Complex 7 (top,  $\text{C}_6\text{D}_6$ ) and Complex 8 (bottom,  $\text{THF-d}_8$ ).

## Cyclovoltammogram

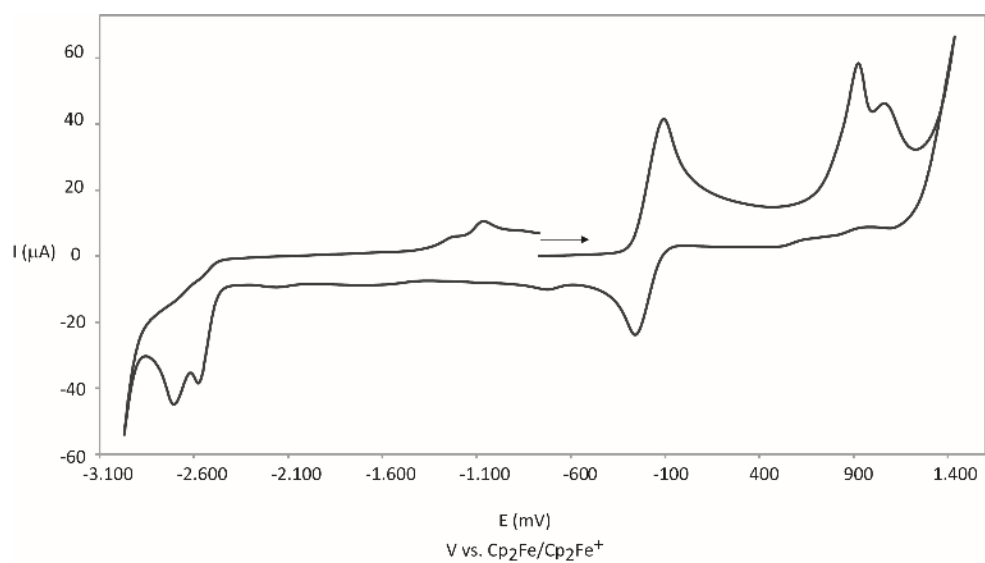

**Fig. S63.** CV of compound  $[(\text{Cp}^*\text{Fe})_2\{\mu,\eta^{4:4}\text{-P}_5^t\text{Bu}(\text{CH}_2)_3\text{P}_5\text{Me}\}]$  (**4**)

## Computational details

DFT calculations were carried out using the ORCA program.<sup>5</sup> The geometries were optimised using the B3LYP<sup>6-9</sup> functional together with the *def2*-TZVP basis set<sup>10</sup> and the RIJCOSX<sup>11</sup> approximation. The dispersion effects have been incorporated by using the charge dependent atom-pairwise dispersion correction D4<sup>12</sup> as implemented in Orca. The nature of the stationary points has been proofed by frequency analysis at the B3LYP-D4/*def2*-SVP level of theory, which show no imaginary frequencies.

### Thermodynamic data for **3** (B3LYP-D4/*def2*-SVP):

```
-----
GIBBS FREE ENERGY
-----

The Gibbs free energy is G = H - T*S

Total enthalpy          ... -7150.78057949 Eh
Total entropy correction ...   -0.13824262 Eh   -86.75 kcal/mol
-----
Final Gibbs free energy ... -7150.91882210 Eh

For completeness - the Gibbs free energy minus the electronic energy
G-E(el)              ...   0.71506087 Eh   448.71 kcal/mol
```

### Thermodynamic data for **3'** (B3LYP-D4/*def2*-SVP):

```
-----
GIBBS FREE ENERGY
-----

The Gibbs free energy is G = H - T*S

Total enthalpy          ... -7150.77005460 Eh
Total entropy correction ...   -0.13966935 Eh   -87.64 kcal/mol
-----
Final Gibbs free energy ... -7150.90972395 Eh

For completeness - the Gibbs free energy minus the electronic energy
G-E(el)              ...   0.71289328 Eh   447.35 kcal/mol
```

**Table S46.** Total energies (final single point energy) for all optimized geometries (B3LYP/*def2*-TZVP level of theory).

|            | total energy [Ha]  |
|------------|--------------------|
| <b>3a</b>  | -7154.469496830940 |
| <b>3a'</b> | -7154.459987063832 |

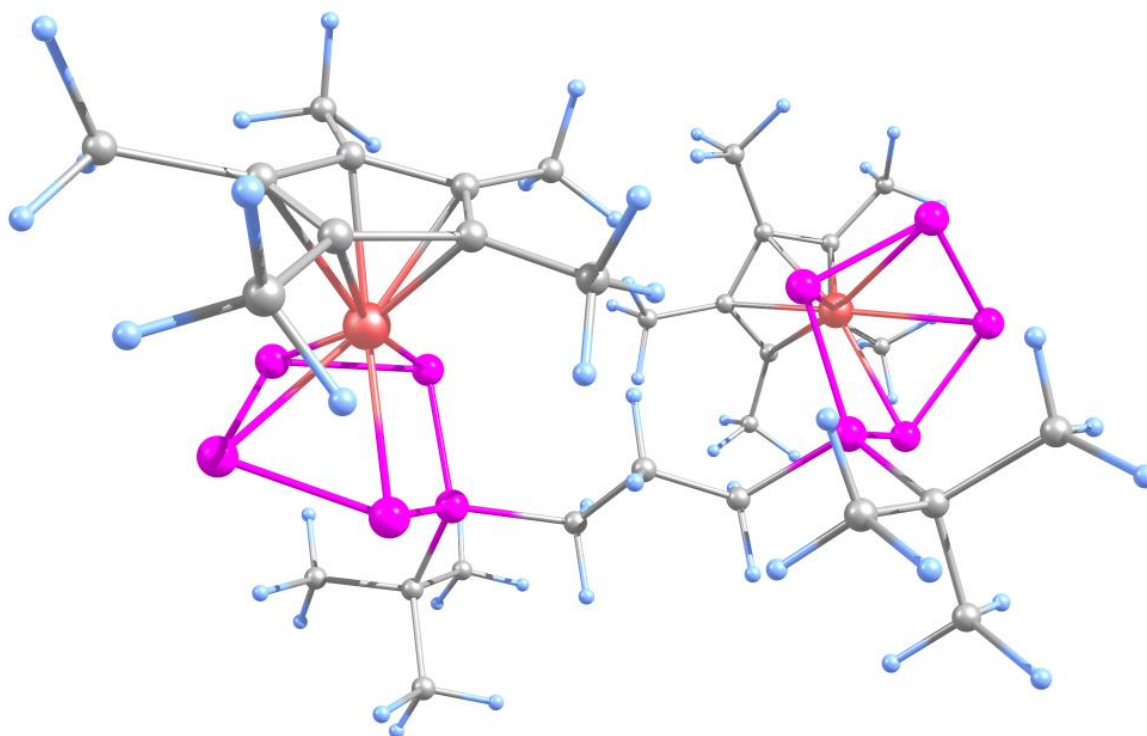

**Table S47.** Optimized geometries of **3a** XYZ coordinated in angstroms. B3LYP/def2-TZVP level of theory.

|    |                   |                   |                   |
|----|-------------------|-------------------|-------------------|
| Fe | -3.89612574913573 | -0.34794107283859 | -0.61397446189609 |
| Fe | 3.63878182935633  | -0.93015456651920 | 0.03386623664552  |
| P  | 2.72596583662703  | 1.98428443911075  | -0.52709583226963 |
| P  | -2.47904750898578 | 0.81931439164679  | 1.76771144278261  |
| P  | -2.19519222764702 | -1.11688757919114 | 0.85454683120389  |
| P  | -4.33696150249641 | 1.46780725569684  | 0.85823333857024  |
| P  | 3.70173633760971  | 1.14423265424407  | 1.21948218773384  |
| P  | 2.72794677903173  | 0.24770188512820  | -1.83115559561846 |
| P  | -4.17304981108793 | -1.98700026386107 | 1.05252360169387  |
| P  | -5.55491174509278 | -0.31893907396633 | 1.05164816421054  |
| P  | 5.51300238333341  | 0.44490453845484  | 0.22559716143593  |
| P  | 4.87589528166990  | -0.14511013519568 | -1.77451950245137 |
| C  | -2.75704189038912 | -0.22898915852495 | -2.36893429247994 |
| C  | -3.74009641237626 | 0.80886054258807  | -2.36061504617170 |
| C  | 2.29073391794523  | -2.55494505457827 | 0.00512928819991  |
| C  | 2.50776470107320  | -2.10965326839348 | 1.34692690368712  |
| C  | -5.03686394142918 | 0.19910881981853  | -2.26082044292164 |
| C  | -4.85189239364236 | -1.22466109185548 | -2.21200947448532 |
| C  | 3.91484353088382  | -2.21091106027846 | 1.62563312402477  |
| C  | 0.17146498395089  | 1.34587488646333  | 0.68506972878698  |
| H  | 0.07594117430131  | 0.43153067628905  | 0.08295905563726  |
| H  | 0.69395367599429  | 1.05910343916883  | 1.60829499788266  |
| C  | -2.31589299830187 | 1.00938776240778  | 3.63896481285955  |
| C  | 4.56209932779603  | -2.72549334119760 | 0.45120656677535  |
| C  | -3.44128425776155 | -1.49073391666385 | -2.27377367067324 |
| C  | 3.55642221939502  | -2.93205418438149 | -0.55255365519323 |
| C  | 0.97905999020489  | 2.39146087873303  | -0.08078545291381 |
| H  | 1.02413260663825  | 3.32772445123772  | 0.49897022792544  |
| H  | 0.46760790058279  | 2.63329733103882  | -1.02617384514508 |
| C  | -2.69115112053084 | 2.44953574614726  | 4.01632789732006  |
| H  | -1.97217538710364 | 3.18643291444912  | 3.62464214135845  |
| H  | -3.69420405867065 | 2.71627072296564  | 3.64764707322029  |
| H  | -2.69676759444189 | 2.55038796615007  | 5.11483899566725  |
| C  | 1.45641649189169  | -1.72089622063759 | 2.33625991562819  |
| H  | 0.52554835846223  | -1.41414014276806 | 1.84268734374579  |
| H  | 1.20571780033101  | -2.57503250832909 | 2.99116351141586  |
| H  | 1.79325447873039  | -0.89792011945588 | 2.98329620212600  |
| C  | -1.21629681617293 | 1.92902377130274  | 0.98514511883186  |
| H  | -1.68697372826550 | 2.25103295146045  | 0.04431993631708  |
| H  | -1.13142981035002 | 2.82779699692140  | 1.61714269391292  |
| C  | -6.34481357035571 | 0.92725496762155  | -2.27412848423879 |

|   |                   |                   |                   |
|---|-------------------|-------------------|-------------------|
| H | -7.14174414177934 | 0.33246993353545  | -1.80631330896582 |
| H | -6.28348293653178 | 1.88073314521188  | -1.72748993869308 |
| H | -6.65802531299513 | 1.15885854848086  | -3.30782938145936 |
| C | 3.36638193875112  | 3.63683685344448  | -1.21289012029019 |
| C | -3.47472562501108 | 2.27426111282028  | -2.51703829850012 |
| H | -4.21331367301737 | 2.88310247491656  | -1.97687337609788 |
| H | -2.47886509192531 | 2.54947004595706  | -2.13910851464098 |
| H | -3.51233134100339 | 2.56495775387648  | -3.58227418415085 |
| C | -1.28373402863463 | -0.04389176057037 | -2.55826435844719 |
| H | -0.94222634043921 | 0.93803104427093  | -2.20159225599459 |
| H | -0.69903910744720 | -0.80875904085939 | -2.03302256039088 |
| H | -1.01727143492772 | -0.10580841634408 | -3.62847393962158 |
| C | -2.78910623066653 | -2.83825460314679 | -2.30028207807962 |
| H | -1.82256998154093 | -2.82761975003145 | -1.77549620258395 |
| H | -3.41785457177005 | -3.59903545291230 | -1.81616478961656 |
| H | -2.59941782580890 | -3.16736903779599 | -3.33736409547827 |
| C | -3.30671626147096 | 0.02210961448595  | 4.27546085102345  |
| H | -4.34177040725422 | 0.23088866524621  | 3.96679096039081  |
| H | -3.07714602946781 | -1.01731980953922 | 3.99715702004004  |
| H | -3.25086201641440 | 0.10536437864543  | 5.37409675928465  |
| C | 4.56717734503382  | -1.90061538299555 | 2.93661646325379  |
| H | 4.07419368425839  | -1.05592544585631 | 3.44148681920147  |
| H | 4.52035493112992  | -2.76789004951645 | 3.61915692387473  |
| H | 5.62586919510979  | -1.63305338309244 | 2.80687519247078  |
| C | -5.94237268587966 | -2.24854965654429 | -2.15864340318297 |
| H | -5.60824932475562 | -3.16651741348056 | -1.65421601291025 |
| H | -6.81737170953091 | -1.87339520635478 | -1.60828113246234 |
| H | -6.27538482185921 | -2.52259790071164 | -3.17539657651192 |
| C | 0.97235294487392  | -2.70633931575721 | -0.68431839391206 |
| H | 0.60412030409464  | -3.74354415009104 | -0.58721469912241 |
| H | 0.20473668981612  | -2.05153390287631 | -0.25321299685478 |
| H | 1.04984414340455  | -2.48215398769093 | -1.75790381601353 |
| C | -0.88306060409607 | 0.67436413830048  | 4.07081995560187  |
| H | -0.59284372939834 | -0.33878940738243 | 3.75531843437300  |
| H | -0.14604720549080 | 1.38688156236279  | 3.66956756878283  |
| H | -0.81230067288057 | 0.71382345227039  | 5.17120215212140  |
| C | 6.01479033707361  | -3.05909139300167 | 0.31164526404586  |
| H | 6.36727292752861  | -2.89369849689484 | -0.71689339968466 |
| H | 6.63709302534768  | -2.44085812638212 | 0.97377170419649  |
| H | 6.19757815841632  | -4.11863898654852 | 0.56414216365363  |
| C | 3.76405130419111  | -3.51490618347219 | -1.91649353886732 |
| H | 3.54224272245728  | -4.59719447208472 | -1.91921159736249 |
| H | 3.10743969054357  | -3.04306702040378 | -2.66310841889203 |
| H | 4.79920306819607  | -3.38178094553984 | -2.25941176225676 |
| C | 4.76670042226113  | 3.43727144033872  | -1.81024381495882 |
| H | 5.48787417508745  | 3.08980039170756  | -1.05800897026522 |
| H | 4.76171033691015  | 2.70801040030851  | -2.63258989184910 |
| H | 5.12207631794461  | 4.40306457201739  | -2.20814199320806 |
| C | 3.44799184853727  | 4.64132793126242  | -0.05275425562757 |
| H | 2.46092764084933  | 4.88762323843146  | 0.36840268635858  |
| H | 4.08478368274756  | 4.26018503288130  | 0.76094914726248  |
| H | 3.89178802794604  | 5.58324637349836  | -0.41682164768497 |
| C | 2.40797921088174  | 4.11994907416431  | -2.31329158946251 |
| H | 2.84443207062695  | 4.99971917099148  | -2.81517893366004 |
| H | 2.25023837467637  | 3.34413725775405  | -3.08057697352942 |
| H | 1.42774951173002  | 4.42367586028766  | -1.91699958778658 |

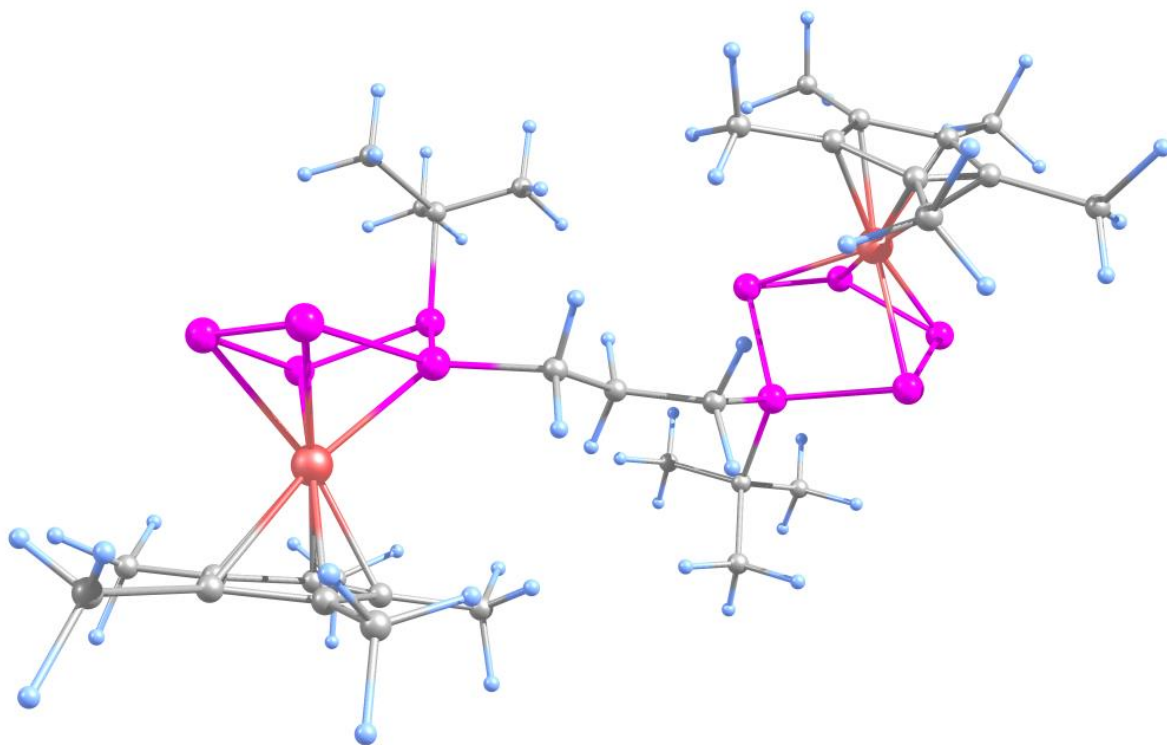

**Table S48.** Optimized geometries of **3a'** XYZ coordinated in angstroms. B3LYP/def2-TZVP level of theory.

|   |                   |                   |                   |
|---|-------------------|-------------------|-------------------|
| P | 2.44539429396336  | -1.63150957727077 | -0.56624568811845 |
| P | 4.18288554905658  | -2.04334067820079 | 0.65771698796980  |
| P | 2.96365208327462  | 0.27643072547505  | -1.44506134814584 |
| P | 4.99665829204042  | -0.11733571562264 | -2.10576091782546 |
| P | 5.78669842928416  | -1.60216182730581 | -0.74054111708681 |
| C | -4.32237036143721 | -2.24994338320505 | 0.38198718623868  |
| C | -5.33180200510359 | -1.87981478722743 | -0.56168471750866 |
| C | 5.90456882100594  | 0.67531086779285  | 1.80330498644082  |
| C | 4.01448111218912  | 1.91223624064214  | 1.27041770714961  |
| C | 1.14366169286186  | -1.22648153870422 | 0.68585548081296  |
| H | 0.92909878608511  | -2.13436335313511 | 1.27145493601319  |
| H | 1.64959550734042  | -0.52058589788193 | 1.36094249627807  |
| C | 6.22403434941569  | 1.50674247722723  | 0.67625895592743  |
| C | -4.75460713578247 | -1.83756867816226 | 1.68922442226243  |
| C | 4.53812100801846  | 0.93199169561136  | 2.16921381468231  |
| C | -6.40131151443794 | -1.24215540508671 | 0.16011120758601  |
| C | 5.05361762857041  | 2.26953552324628  | 0.34261859775758  |
| C | -6.04310618885554 | -1.21646867600004 | 1.55024634252320  |
| C | 1.77814016247471  | -2.99504408952664 | -1.69782683345156 |
| C | -5.31438316822299 | -2.17901106220682 | -2.02835648606342 |
| H | -5.91112955956582 | -1.45039438949540 | -2.59385684404720 |
| H | -5.72855671759738 | -3.18402732498262 | -2.22734446343647 |
| H | -4.29350907848526 | -2.15156602182003 | -2.43677773946805 |
| C | -3.07215104715659 | -3.00939190196026 | 0.05856241335920  |
| H | -2.68905422174062 | -2.74902650353494 | -0.93848857165326 |
| H | -3.26459419454801 | -4.09712517395346 | 0.06411121213906  |
| H | -2.27426420893490 | -2.81761432026169 | 0.79028543792085  |
| C | 2.64994271871682  | 2.52607539906659  | 1.32835018930718  |
| H | 2.28814654446457  | 2.80471165518175  | 0.32915910024345  |
| H | 2.65663277982481  | 3.43940679667960  | 1.94984010339740  |
| H | 1.91173942532892  | 1.83914097206686  | 1.76822626880270  |
| C | -4.03406753943925 | -2.07875170717262 | 2.97994122758041  |
| H | -2.94907351147422 | -2.18154906597152 | 2.82874551624690  |
| H | -4.38340920060708 | -3.00911255819940 | 3.46210638930850  |
| H | -4.19111712202257 | -1.25416962275161 | 3.69018625512406  |

|    |                   |                   |                    |
|----|-------------------|-------------------|--------------------|
| C  | -6.88036700776841 | -0.68406234984916 | 2.67067693049336   |
| H  | -6.25607306035811 | -0.28643806848906 | 3.48388699477691   |
| H  | -7.52136006686509 | -1.47684283467343 | 3.09530203072705   |
| H  | -7.53432782036340 | 0.13222664366207  | 2.33248045973471   |
| C  | -7.67814381059893 | -0.74349647176478 | -0.44139718414848  |
| H  | -8.15333830542165 | 0.01587136764541  | 0.19516188462643   |
| H  | -8.39816254708470 | -1.56935878961601 | -0.57956104707206  |
| H  | -7.50347166941354 | -0.28397570960381 | -1.425771149573560 |
| C  | 6.83575019641436  | -0.25363723817978 | 2.51794643197242   |
| H  | 6.31107687510651  | -1.15313999510042 | 2.87440528021003   |
| H  | 7.28949050395642  | 0.23622353845723  | 3.39787561324072   |
| H  | 7.65161009446840  | -0.58908975925541 | 1.86211070781385   |
| C  | 3.82532628074685  | 0.33611420621362  | 3.34360314097039   |
| H  | 2.73427557065571  | 0.33150311033001  | 3.20259347247082   |
| H  | 4.03215466853183  | 0.91713632359573  | 4.26024911232908   |
| H  | 4.13962669787124  | -0.70114998704447 | 3.52620905676131   |
| C  | 2.99613377967194  | -3.62019020649078 | -2.39740561334597  |
| H  | 3.68950827071049  | -4.07965516215501 | -1.67743088737660  |
| H  | 3.55998543841537  | -2.87070144113783 | -2.97246627685665  |
| H  | 2.65278651178877  | -4.40220755155561 | -3.09555764627982  |
| C  | 4.93998246371744  | 3.30128235450712  | -0.73600717061683  |
| H  | 5.13695507582520  | 4.31351954466305  | -0.34010639820062  |
| H  | 3.93281140674601  | 3.31030333285774  | -1.17981629439039  |
| H  | 5.65445496076508  | 3.11326352092027  | -1.55001141733605  |
| C  | 1.05524627317668  | -4.04880097333975 | -0.84810021505148  |
| H  | 0.78720277967868  | -4.91346892321613 | -1.47874771326316  |
| H  | 0.12336618645440  | -3.66205803049342 | -0.40775870012113  |
| H  | 1.69803016936052  | -4.42153227451632 | -0.03341914010069  |
| C  | 7.55713315711428  | 1.59787018126467  | 0.00142421765325   |
| H  | 7.45202756875091  | 1.85123648829434  | -1.06332941227567  |
| H  | 8.09942808516848  | 0.64320172382533  | 0.05829678368944   |
| H  | 8.18658256762026  | 2.37322060175883  | 0.47278206330806   |
| C  | 0.84605731885567  | -2.37481435049682 | -2.75052224056930  |
| H  | 0.53432005192236  | -3.15666062888461 | -3.46380457465272  |
| H  | 1.35841214252534  | -1.58383655286562 | -3.31980286038210  |
| H  | -0.06467235468716 | -1.93857400685041 | -2.31675528212024  |
| P  | -2.51021934669681 | 1.39616820129440  | -1.52976635049044  |
| P  | -2.60324477658315 | 0.63741222191977  | 0.48179291482486   |
| C  | -1.83769831025607 | 3.17808446685466  | -1.59137998222399  |
| C  | -2.01773358773538 | 3.63053972810982  | -3.04972347568192  |
| H  | -1.48100309545854 | 2.97167071297804  | -3.75132413689115  |
| H  | -1.62540113808869 | 4.65441236927941  | -3.17824127513084  |
| H  | -3.08200792441164 | 3.64264792094999  | -3.33676553256952  |
| C  | -0.34625282526864 | 3.08932364673840  | -1.23101323753738  |
| H  | -0.20471139097553 | 2.76442725522005  | -0.18753026391548  |
| H  | 0.12585387549892  | 4.08270986923097  | -1.32981914914440  |
| H  | 0.20436127958791  | 2.39227102801642  | -1.88306998585895  |
| C  | -2.56088227977087 | 4.13610373769510  | -0.64312468725614  |
| H  | -3.63448164797064 | 4.19981118788662  | -0.87342916224385  |
| H  | -2.12952564173566 | 5.14897662916362  | -0.73538403770925  |
| H  | -2.46596988865205 | 3.82023688042076  | 0.40627983929713   |
| P  | -4.73317678199069 | 1.28548835324196  | -1.42812107771082  |
| P  | -5.47012892374880 | 2.00635151595480  | 0.50825779559798   |
| P  | -3.91371958134012 | 1.56751956566209  | 1.93079060974306   |
| Fe | -4.64041281480067 | -0.18990346022601 | 0.44389789471545   |
| Fe | 4.67565660190309  | 0.24017766646437  | 0.19432640181534   |
| C  | -0.13177116942396 | -0.60734020216688 | 0.11646696641590   |
| H  | -0.70437063700491 | -1.35912154645079 | -0.44474881579102  |
| H  | 0.13063479379826  | 0.17749995634143  | -0.60910571972749  |
| C  | -1.02250727489472 | -0.00112532009759 | 1.20185183414550   |
| H  | -0.50478170073378 | 0.82328204389501  | 1.71854231720777   |
| H  | -1.29420467520964 | -0.74664515414315 | 1.96655219697078   |

## References

- 1 E. S. S. A, L. Lochmann and J. Trekoval, *J. Organomet. Chem.*, 1987, **326**, 1–7.
- 2 O. J. Scherer and T. Brück, *Angew. Chem. Int. Ed.*, 1987, **26**, 11987.
- 3 M. V. Butovskiy, G. Balázs, M. Bodensteiner, E. V. Peresykina, A. V. Virovets, J. Sutter and M. Scheer, *Angew. Chem. Int. Ed.*, 2013, **52**, 2972–2976.
- 4 S. Reichl, E. Mädl, F. Riedlberger, M. Piesch, G. Balázs, M. Seidl and M. Scheer, *Nat. Commun.*, 2021, **12**, 5774.
- 5 a) ORCA - *An Ab Initio, DFT and Semiempirical electronic structure package*, Version 5.0; b) F. Neese, *WIREs Comput Mol Sci.*, **2012**, 2, 73–78; b) F. Neese, *WIREs Comput Mol Sci.*, **2017**, 8, e1327.
- 6 A. D. Becke, *J. Chem. Phys.*, 2005, **98**, 5648–5652.
- 7 S. H. Vosko, L. Wilk and M. Nusair, *Can. J. Phys.*, 1980, **58**, 1200–1211.
- 8 C. Lee, W. Yang and R. G. Parr, *Phys. Rev. B*, 1988, **37**, 785–789.
- 9 P. J. Stephen, F. J. Devlin, C. F. Chabalowski and M. J. Frisch, *J. Phys. Chem.*, 1994, **98**, 11623–11627.
- 10 F. Weigend and R. Ahlrichs, *Phys. Chem. Chem. Phys.*, 2005, **7**, 3297–3305.
- 11 F. Neese, F. Wennmohs, A. Hansen and U. Becker, *Chem. Phys.*, 2009, **356**, 98–109.
- 11 a) E. Caldeweyher, S. Ehlert, A. Hansen, H. Neugebauer, S. Spicher, C. Bannwarth, S. Grimme, *J. Chem. Phys.* **2019**, 150, 154122; b) E. Caldeweyher, C. Bannwarth, S. Grimme, *J. Chem. Phys.* **2017**, 147, 034112.
- 13 L. J. Bourhis, O. V Dolomanov, R. J. Gildea, J. A. K. Howard and H. Puschmann, *J. Appl. Crystallogr.*, 2009, **42**, 339–341.
- 14 G. M. Sheldrick, *Acta Crystallogr. Sect. A*, 2015, **71**, 3–8.
- 15 G. M. Sheldrick, *Acta Crystallogr. Sect. C*, 2015, **71**, 3–8.
